# Supplementary material for: Quasilinear 3d-metal(i) complexes [KM(N(Dipp)SiR3)2] (M = Cr–Co) – structural diversity, solution state behaviour and reactivity
Source: Royal Society of Chemistry journal article supplement (doi:10.1039/d1dt00121c), 2021-01-01
Supplement: d1dt00121c1.pdf [file d1dt00121c1.pdf]

## **Quasilinear 3d-Metal(I) Complexes [KM(N(Dipp)SiR<sub>3</sub>)<sub>2</sub>] (M = Cr – Co) – Structural Diversity, Solution State Behaviour and Reactivity**

Ruth Weller,<sup>a</sup> I. Müller,<sup>a</sup> Carine Duhayon,<sup>b</sup> Sylviane Sabo-Etienne,<sup>b</sup> Sébastien Bontemps,<sup>b</sup> C. Gunnar Werncke<sup>\*</sup>

<sup>a</sup>Department of Chemistry, Philipps-University Marburg, Hans-Meerwein-Straße 4, D-35032 Marburg, Germany, E-Mail: [gunnar.werncke@chemie.uni-marburg.de](mailto:gunnar.werncke@chemie.uni-marburg.de); <sup>b</sup>CNRS, LCC (Laboratoire de Chimie de Coordination), 205 route de Narbonne, 31077 Toulouse and Université de Toulouse, UPS, INPT, 31077 Toulouse, France

## Table of Content

|                                                                                    |    |
|------------------------------------------------------------------------------------|----|
| 1 NMR Spectra .....                                                                | 1  |
| Temperature-dependent $^1\text{H}$ NMR spectra of 4.....                           | 11 |
| Gradual addition of coordinating solvent to 4 in toluene- $d_8$ .....              | 13 |
| <i>In Situ</i> $^1\text{H}$ NMR's of reacting 2 and 3 with diphenyl acetylene..... | 17 |
| 2 UV/Vis spectra.....                                                              | 19 |
| 3 IR spectra .....                                                                 | 29 |
| 4 X-Ray Diffraction Analysis and Molecular Structures .....                        | 35 |
| References .....                                                                   | 53 |

## 1 NMR Spectra

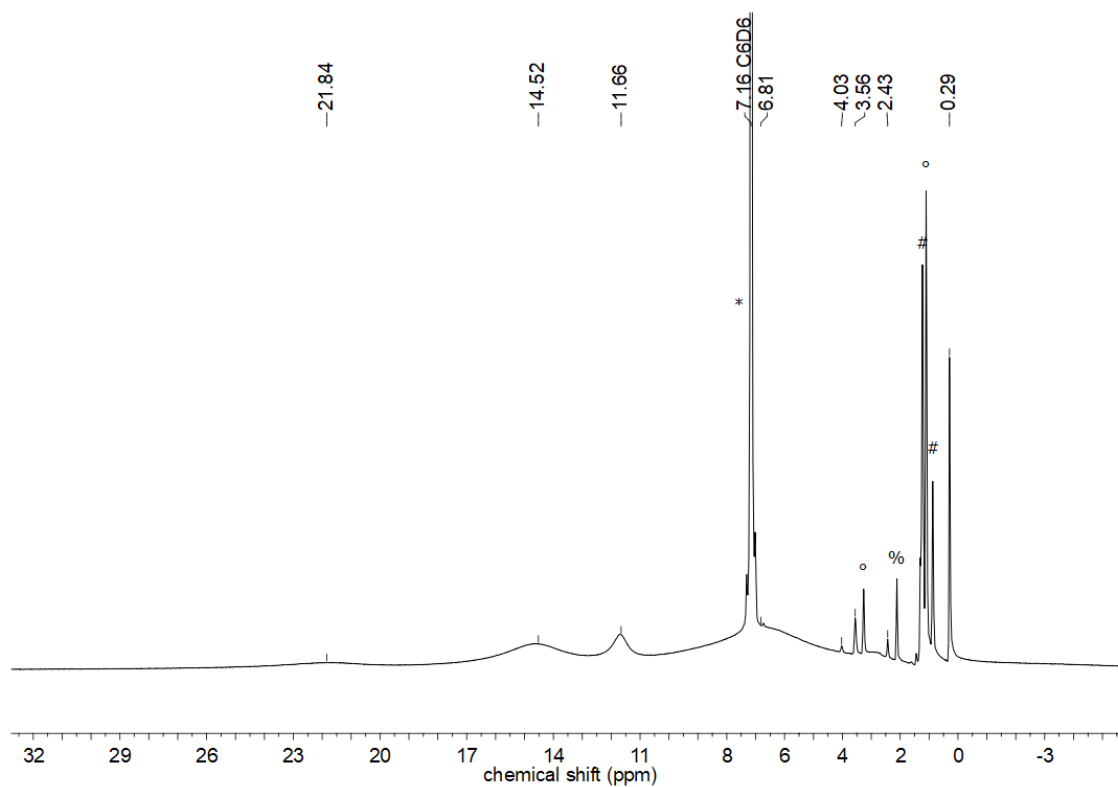

**Figure S 1.**  $^1\text{H}$  NMR spectrum (500.1 MHz) of  $[\text{KCr}(\text{L}^1)_2]$  (1) in  $\text{C}_6\text{D}_6$  at 300 K. (\* solvent, ° diethyl ether, # *n*-pentane, % toluene)

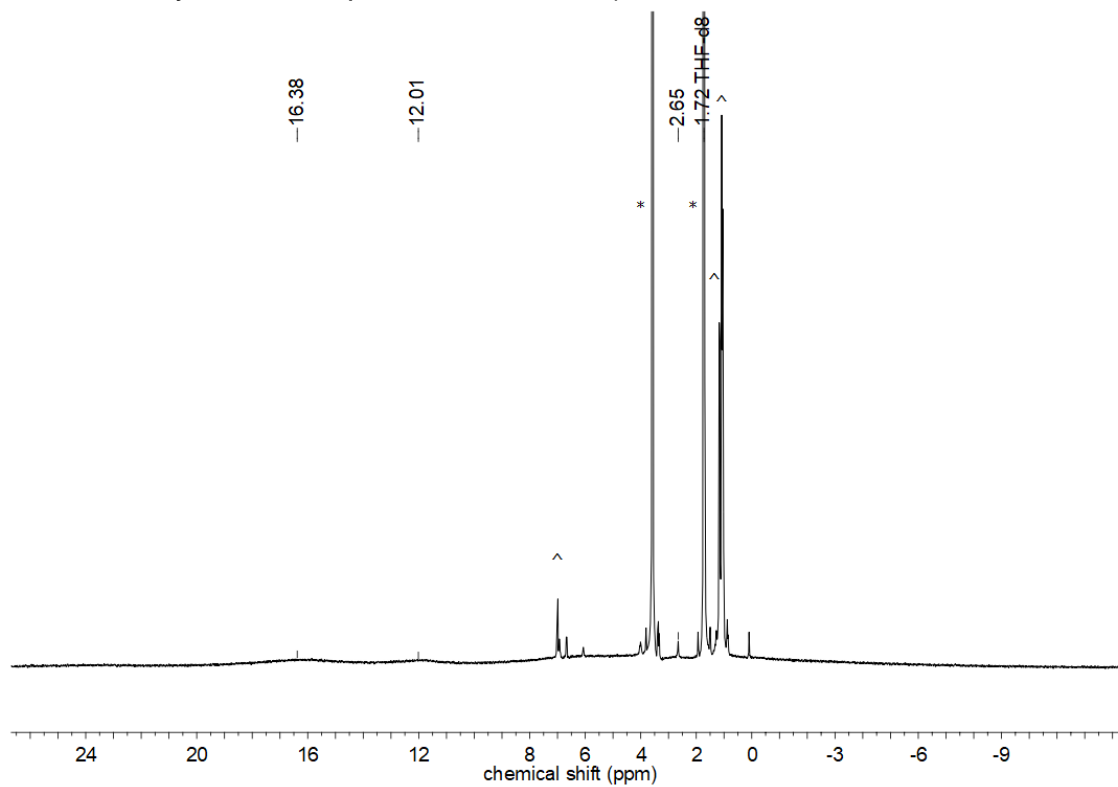

**Figure S 2.**  $^1\text{H}$  NMR spectrum (500.1 MHz) of  $[\text{KCr}(\text{L}^1)_2]$  (1) in  $\text{THF-}d_8$  at 300 K. (\* solvent, ^ impurities)

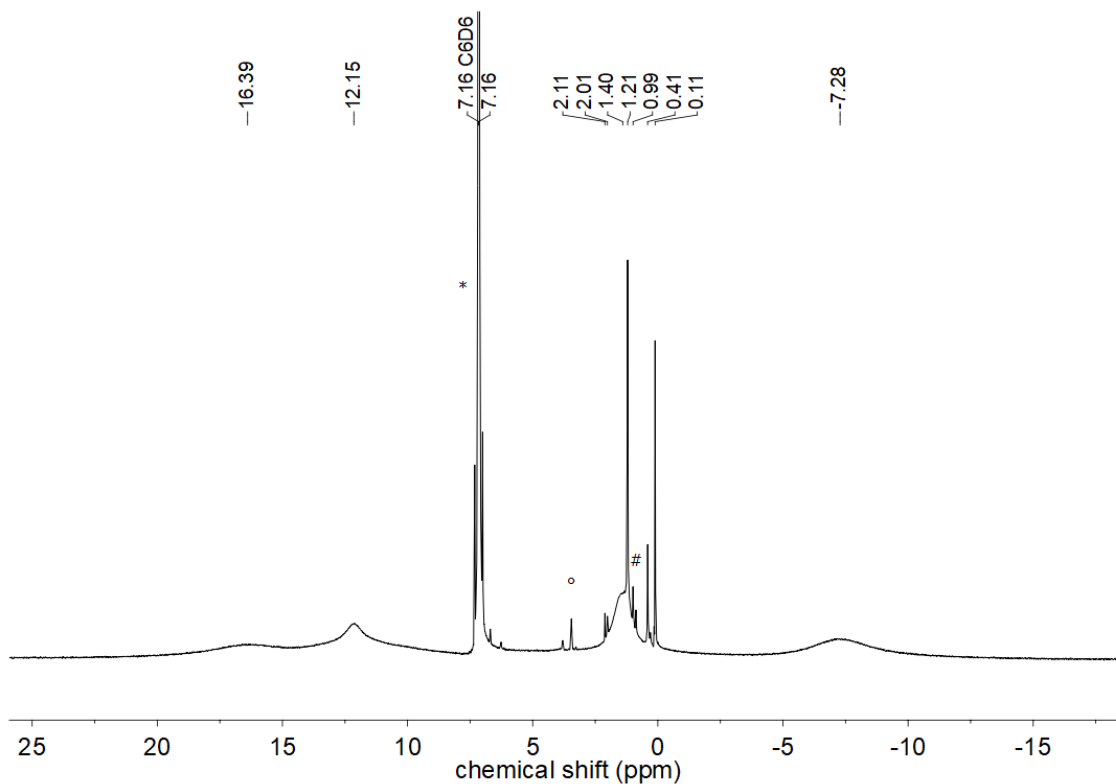

**Figure S 3.**  $^1\text{H}$  NMR spectrum (500.1 MHz) of  $[\text{KMn}(\text{L}^2)_2]$  (**2**) in  $\text{C}_6\text{D}_6$  at 300 K. (\* solvent, ° diethyl ether, # *n*-pentane)

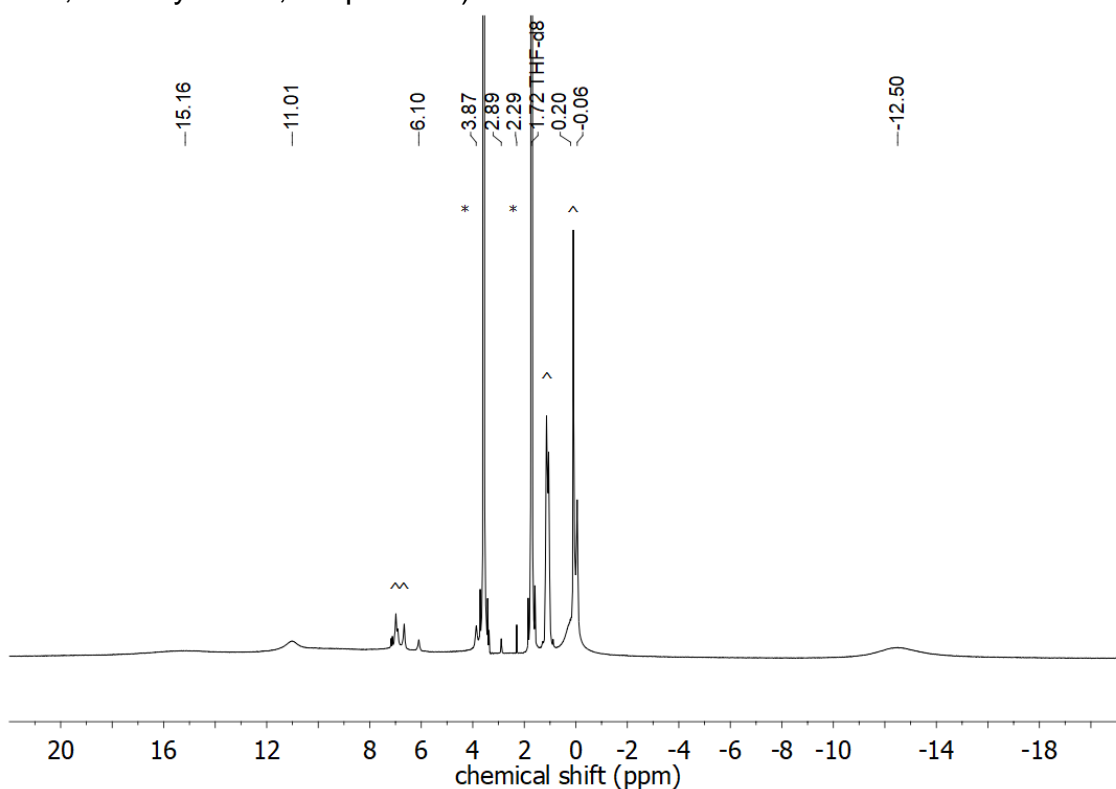

**Figure S 4.**  $^1\text{H}$  NMR spectrum (500.1 MHz) of  $[\text{KMn}(\text{L}^2)_2]$  (**2**) in  $\text{THF-}d_8$  at 300 K. (\* solvent, ^ impurities)

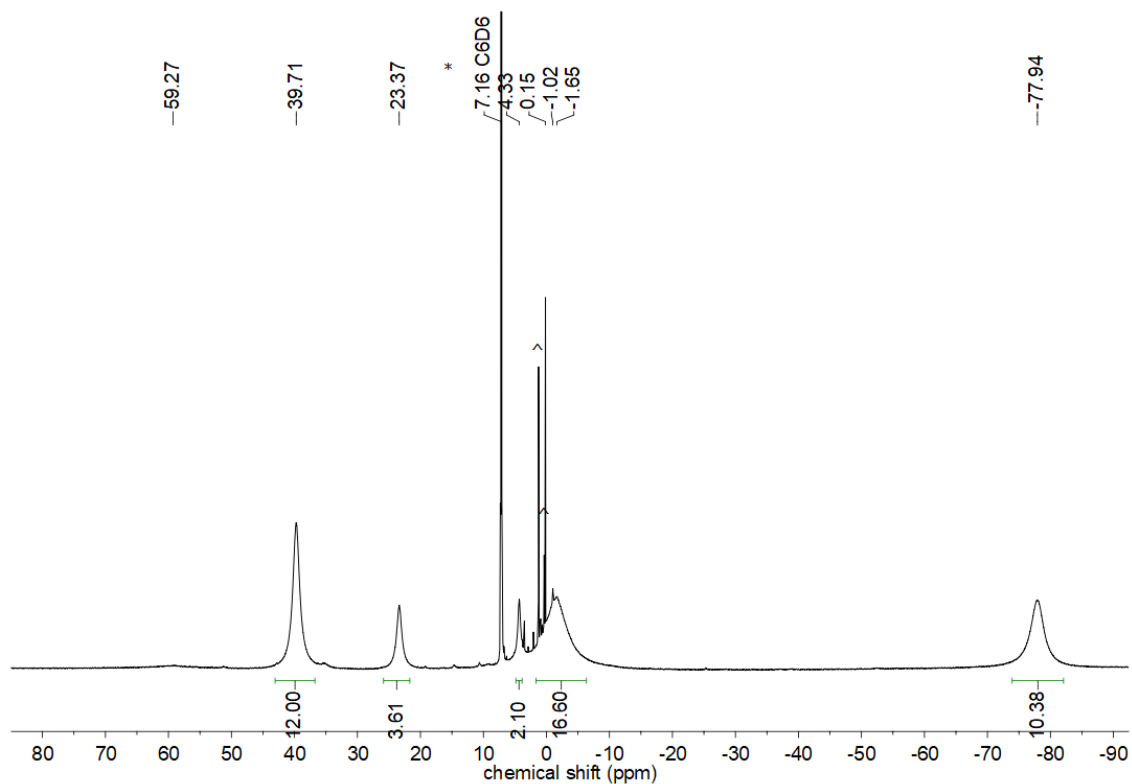

**Figure S 5.**  $^1\text{H}$  NMR spectrum (500.1 MHz) of  $[\text{KFe}(\text{L}^2)_2]$  (**3**) in  $\text{C}_6\text{D}_6$  at 300 K. (\* solvent, ^ impurities)

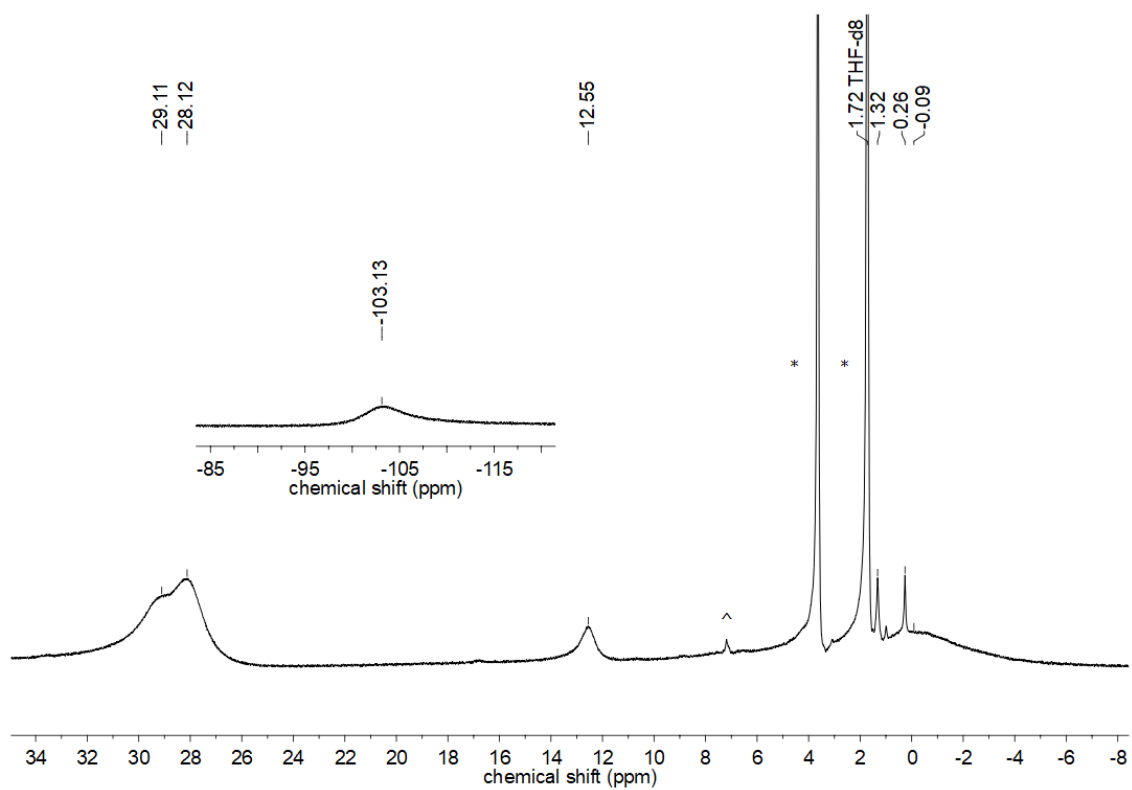

**Figure S 6.**  $^1\text{H}$  NMR spectrum (500.1 MHz) of  $[\text{KFe}(\text{L}^2)_2]$  (**3**) in  $\text{THF-}d_8$  at 300 K. (\* solvent, ^ impurities)

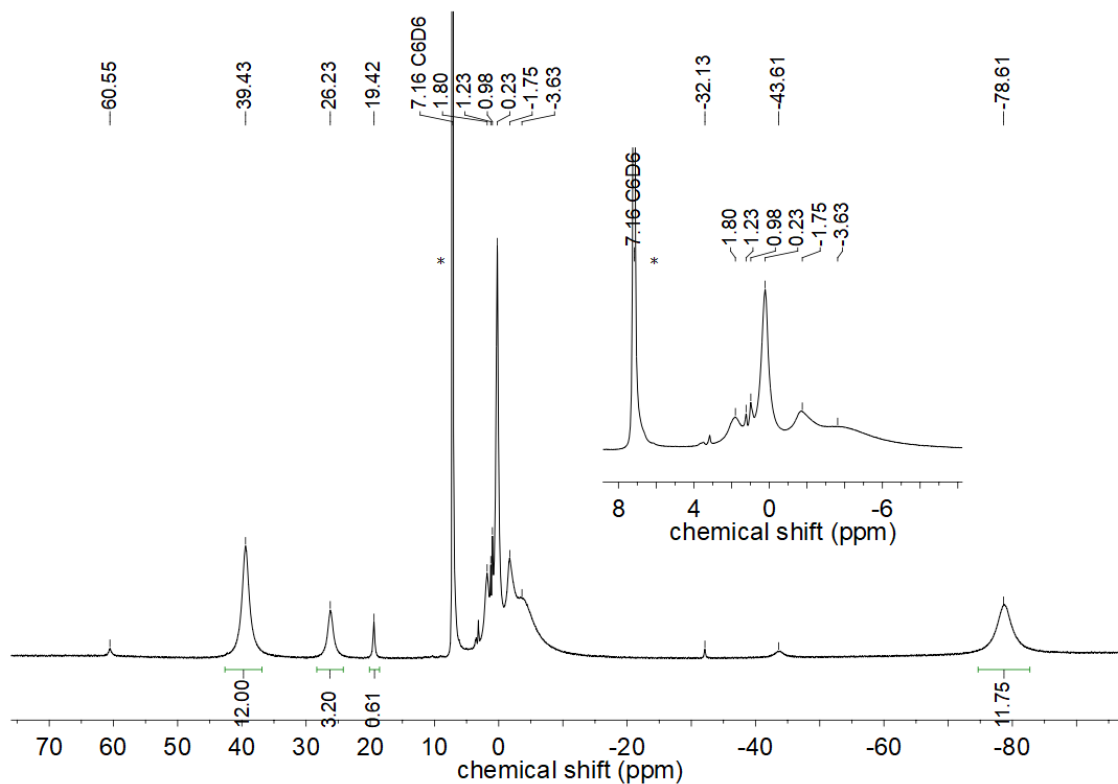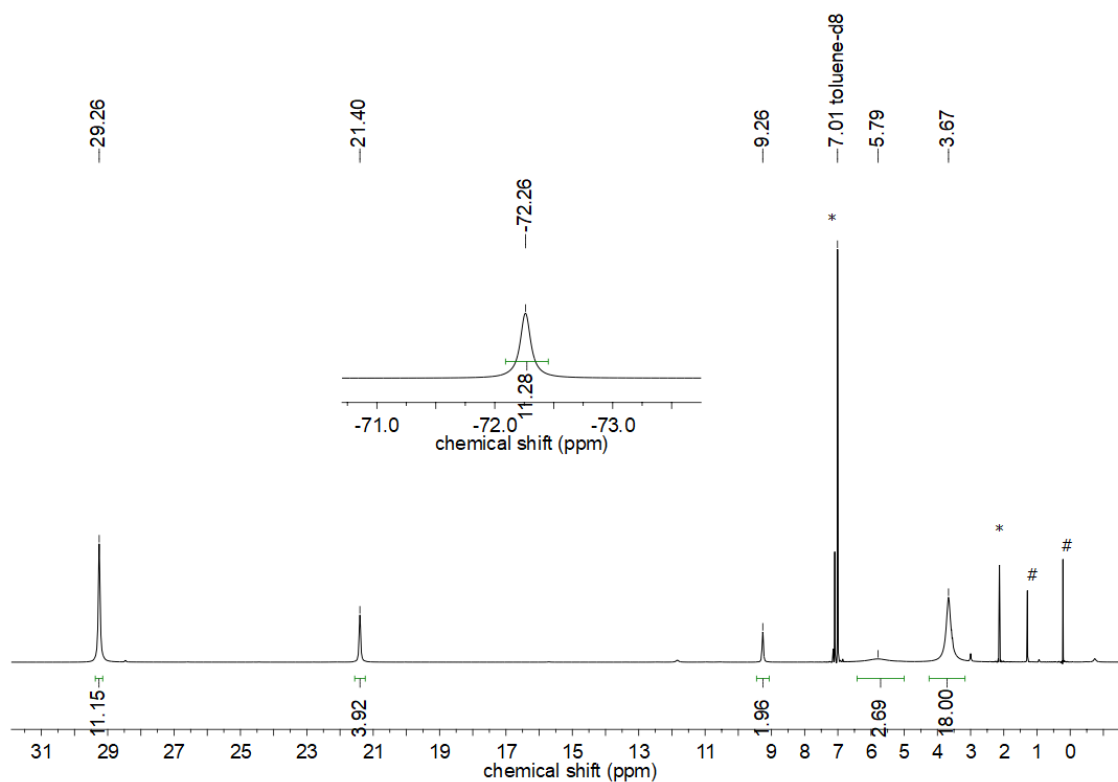

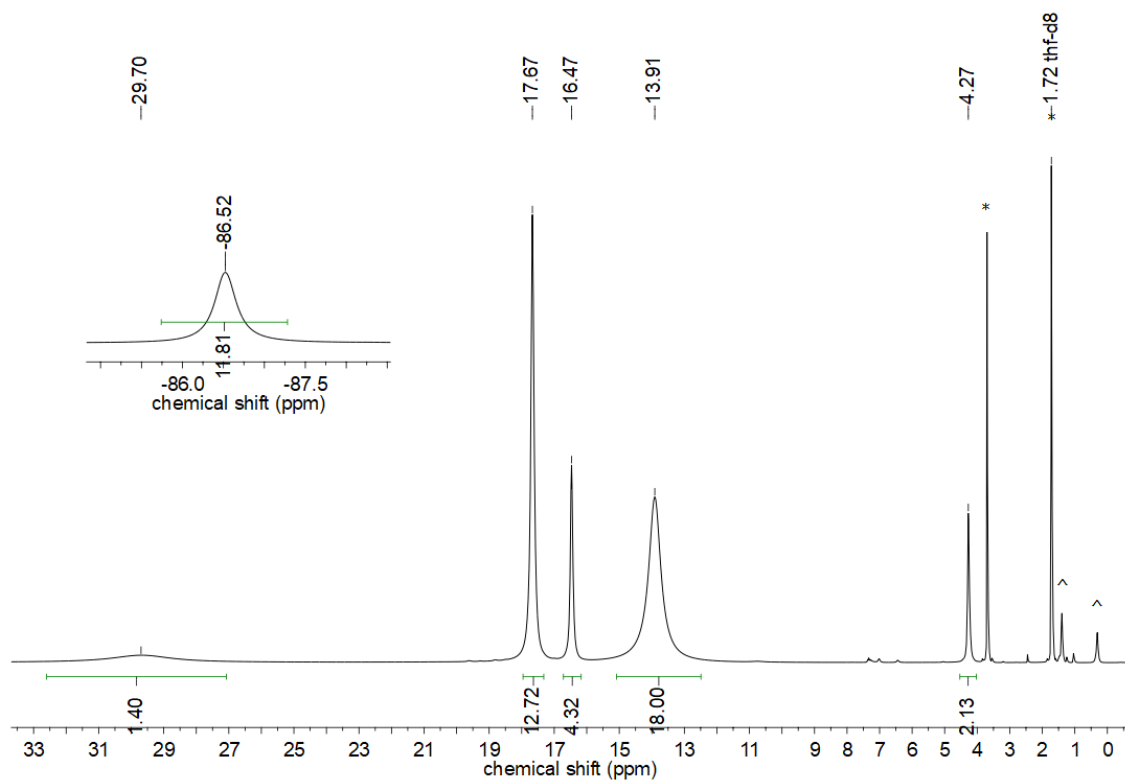

**Figure S 9.**  $^1\text{H}$  NMR spectrum (500.1 MHz) of  $[\text{KCo}(\text{L}^2)_2]$  (**4**) in  $\text{THF-}d_8$  at 300 K. (\* solvent, ^ impurities)

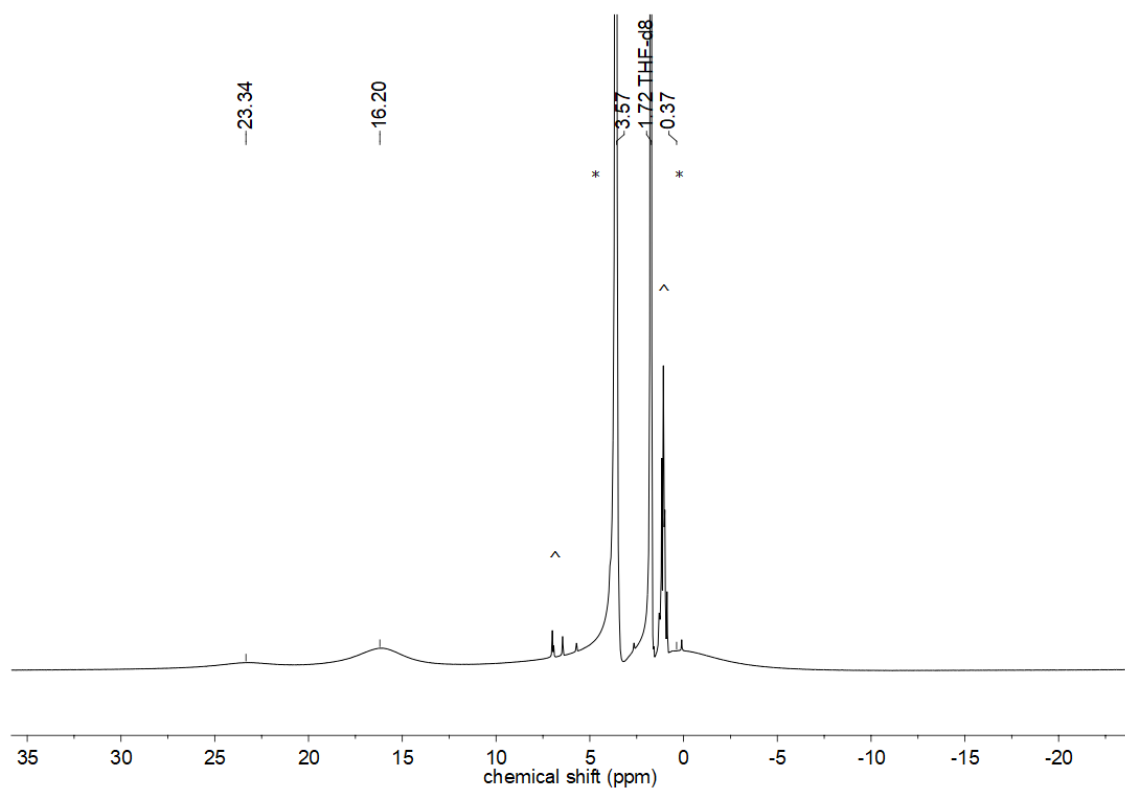

**Figure S 10.**  $^1\text{H}$  NMR spectrum (500.1 MHz) of  $[\text{K}\{18\text{c}6\}][\text{Cr}(\text{L}^1)_2]$  (**5**) in  $\text{THF-}d_8$  at 300 K. (\* solvent, ^ impurities)

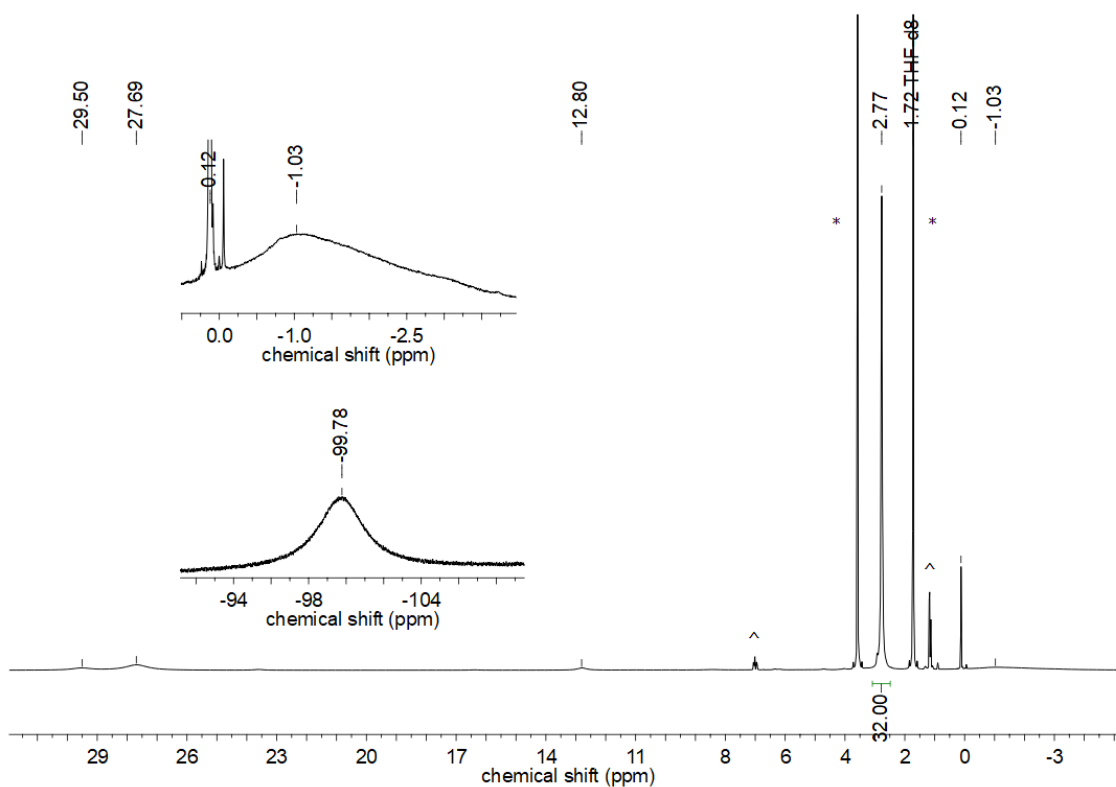

**Figure S 11.**  $^1\text{H}$  NMR spectrum (500.1 MHz) of  $[\text{Li}\{12\text{c}4\}_2][\text{Fe}(\text{L}^2)_2]$  (**6**) in  $\text{THF-}d_8$  at 300 K. (\* solvent, ^ impurities)

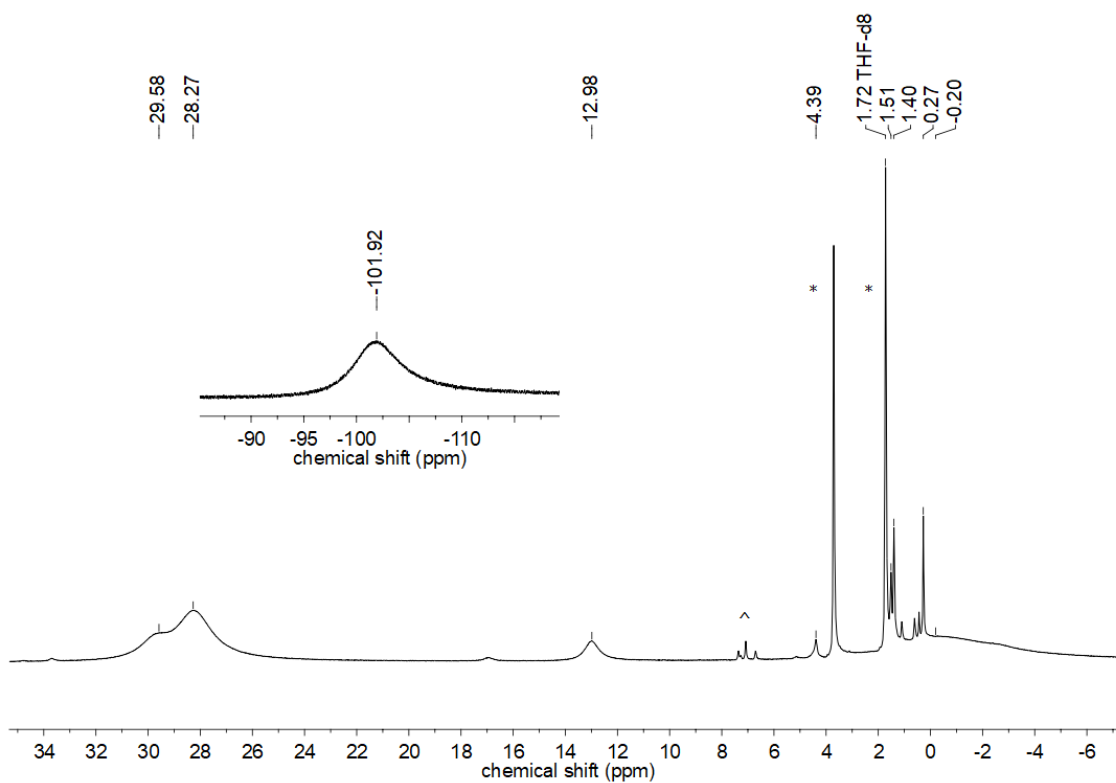

**Figure S 12.** *In Situ*  $^1\text{H}$  NMR spectrum (300.2 MHz) of  $[\text{LiFe}(\text{L}^2)_2]$  in  $\text{THF-}d_8$  at 300 K. (\* solvent, ^ impurities)



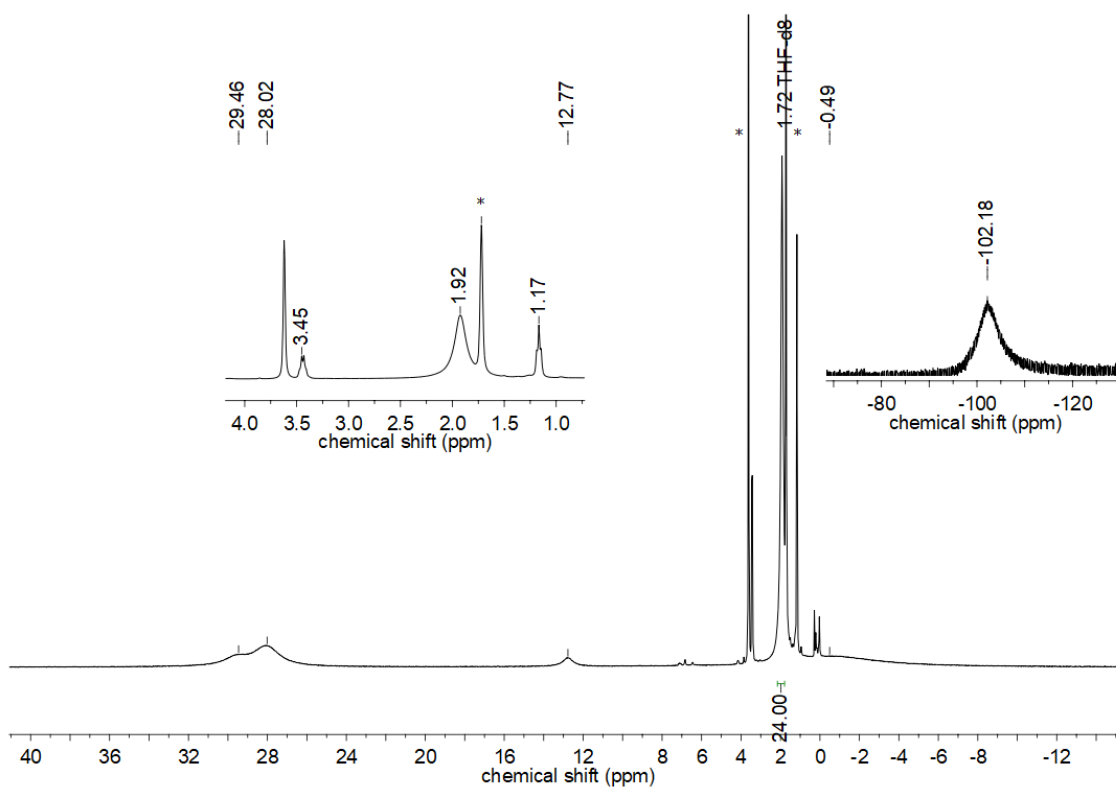

**Figure S 13.**  $^1\text{H}$  NMR spectrum (500.1 MHz) of  $[\text{Na}\{18\text{c}6\}][\text{Fe}(\text{L}^2)_2]$  (**7**) in  $\text{THF-}d_8$  at 300 K. (\* solvent)

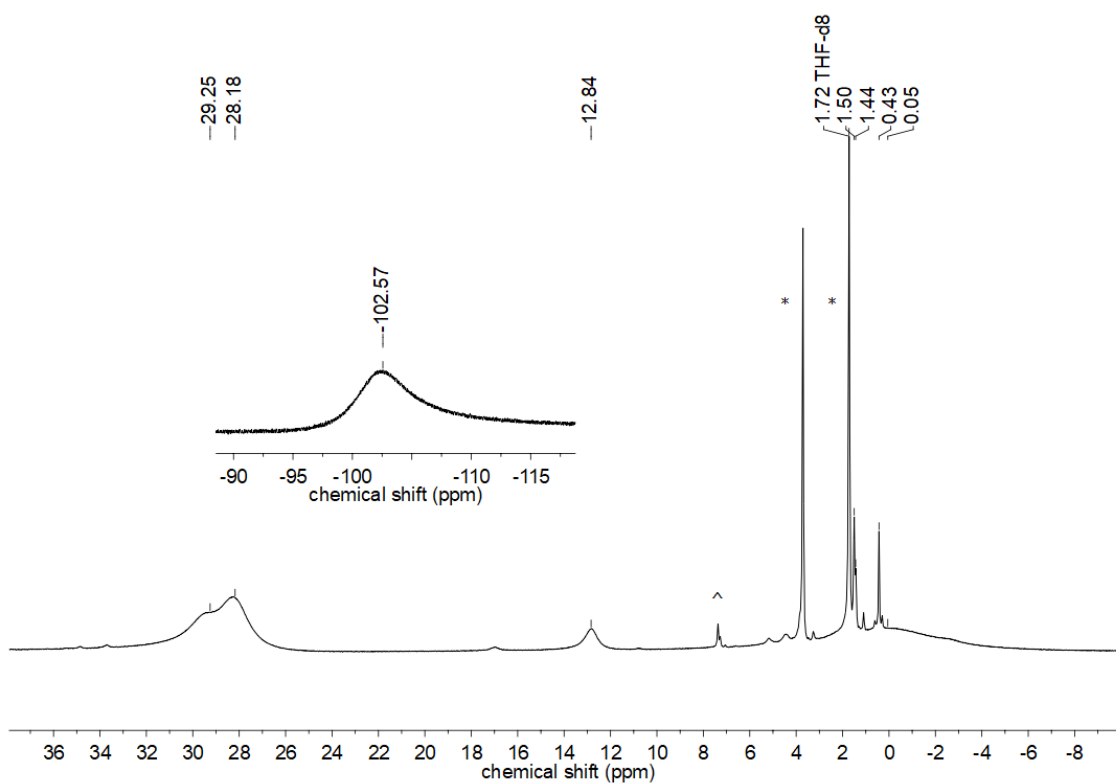

**Figure S 14.** *In Situ*  $^1\text{H}$  NMR spectrum (300.2 MHz) of  $[\text{NaFe}(\text{L}^2)_2]$  in  $\text{THF-}d_8$  at 300 K. (\* solvent, ^ impurities)

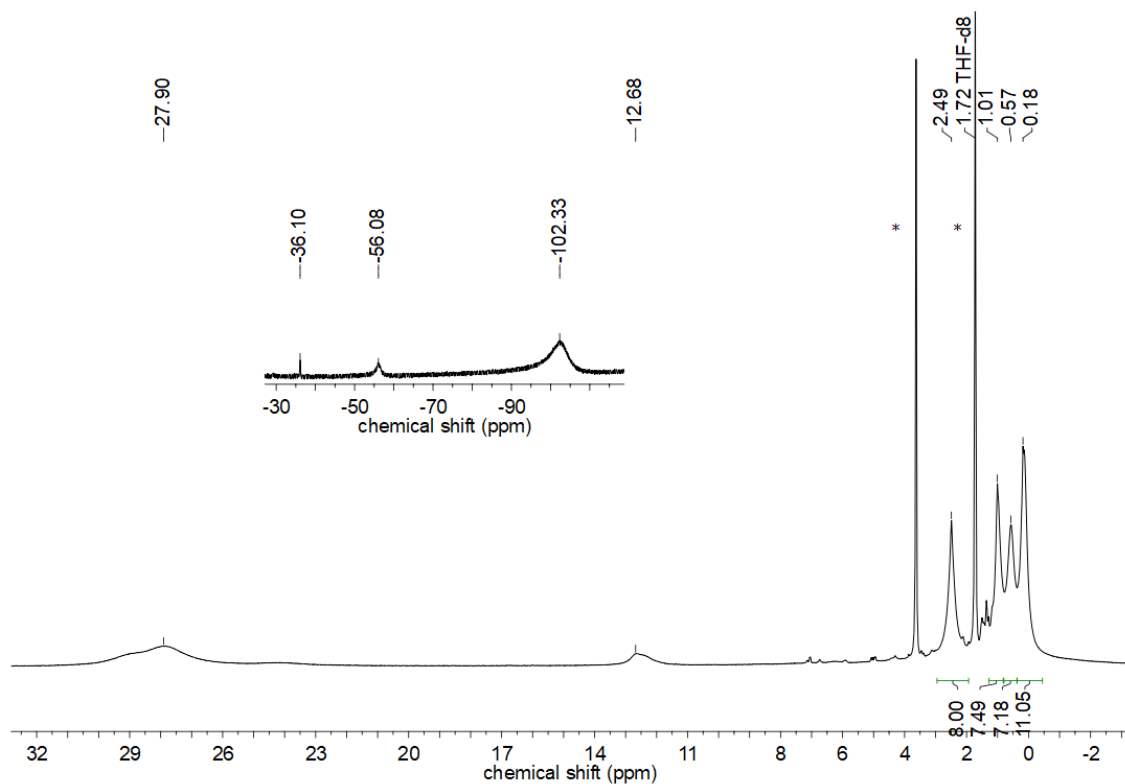

**Figure S 15.**  $^1\text{H}$  NMR spectrum (500.1 MHz) of  $[\text{NBu}_4][\text{Fe}(\text{L}^2)_2]$  (**8**) in  $\text{THF-}d_8$  at 300 K. (\* solvent)

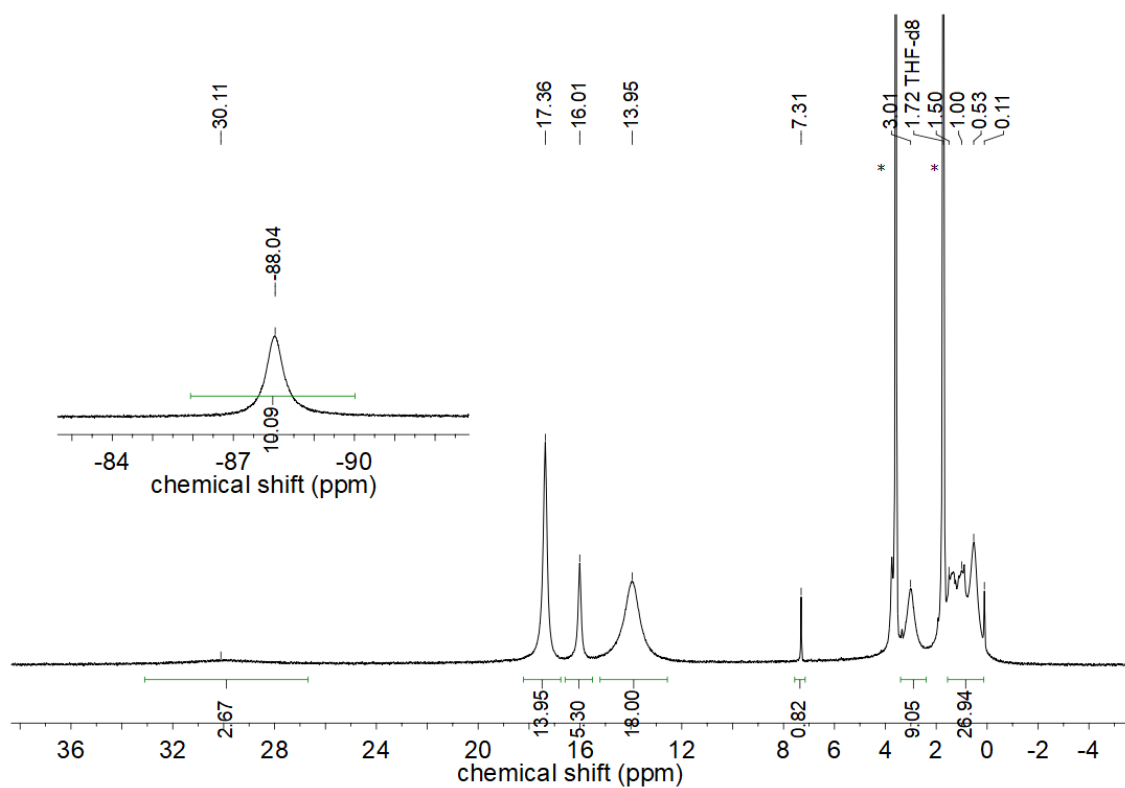

**Figure S 16.**  $^1\text{H}$  NMR spectrum (500.1 MHz) of  $[\text{Bu}_4\text{N}][\text{Co}(\text{L}^2)_2]$  (**9**) in  $\text{THF-}d_8$  at 300 K. (\* solvent)

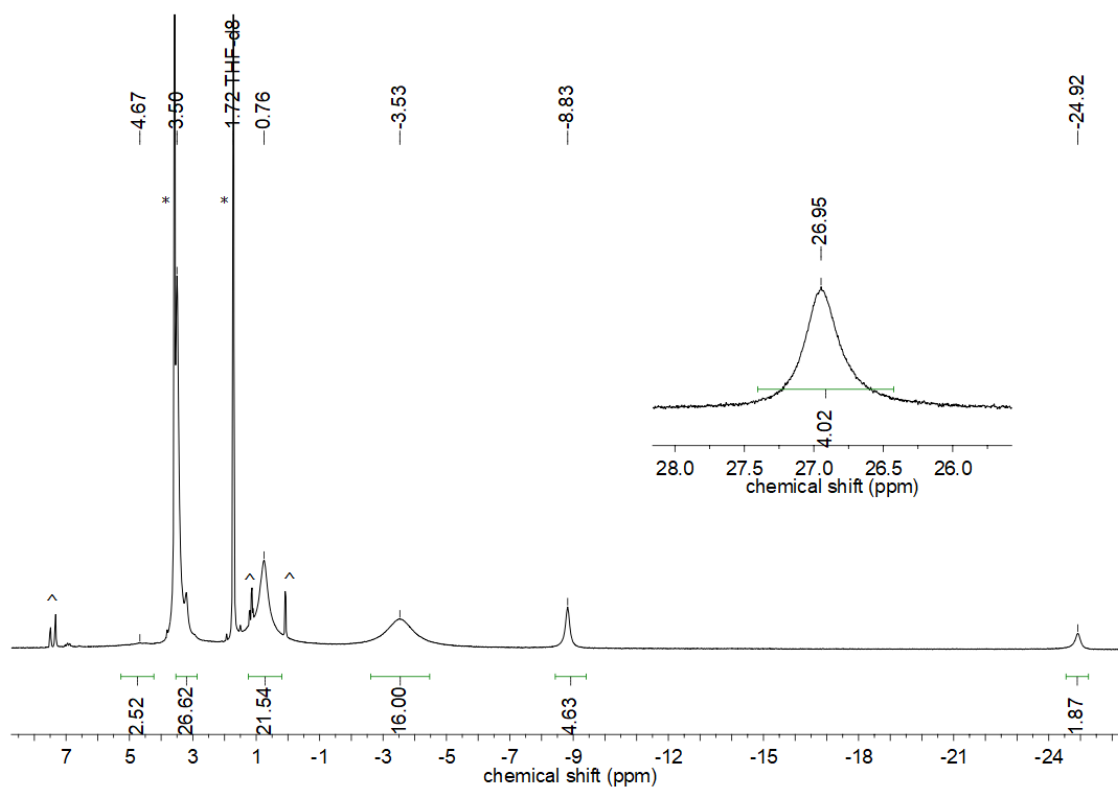

**Figure S 17.**  $^1\text{H}$  NMR spectrum (300.2 MHz) of  $[\text{K}\{18\text{c}6\}][\text{Fe}(\text{L}^2)_2](\eta^2\text{-PhCCPh})$  (**10**) in  $\text{THF-}d_8$  at 300 K. (\* solvent, ^ impurities and residual diphenyl acetylene)

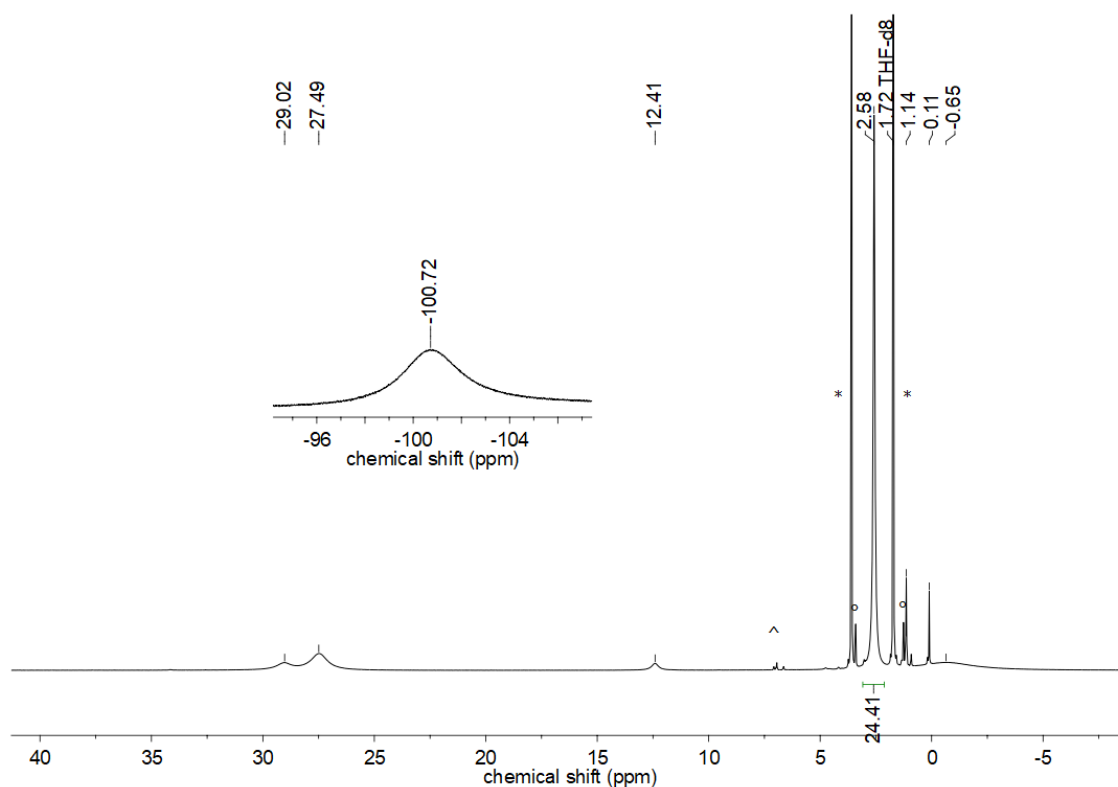

**Figure S 18.**  $^1\text{H}$  NMR spectrum (500.1 MHz) of  $[\text{K}\{18\text{c}6\}][\text{Fe}(\text{L}^2)_2]$  in  $\text{THF-}d_8$  at 300 K. (\* solvent, ° diethyl ether, ^ impurities)

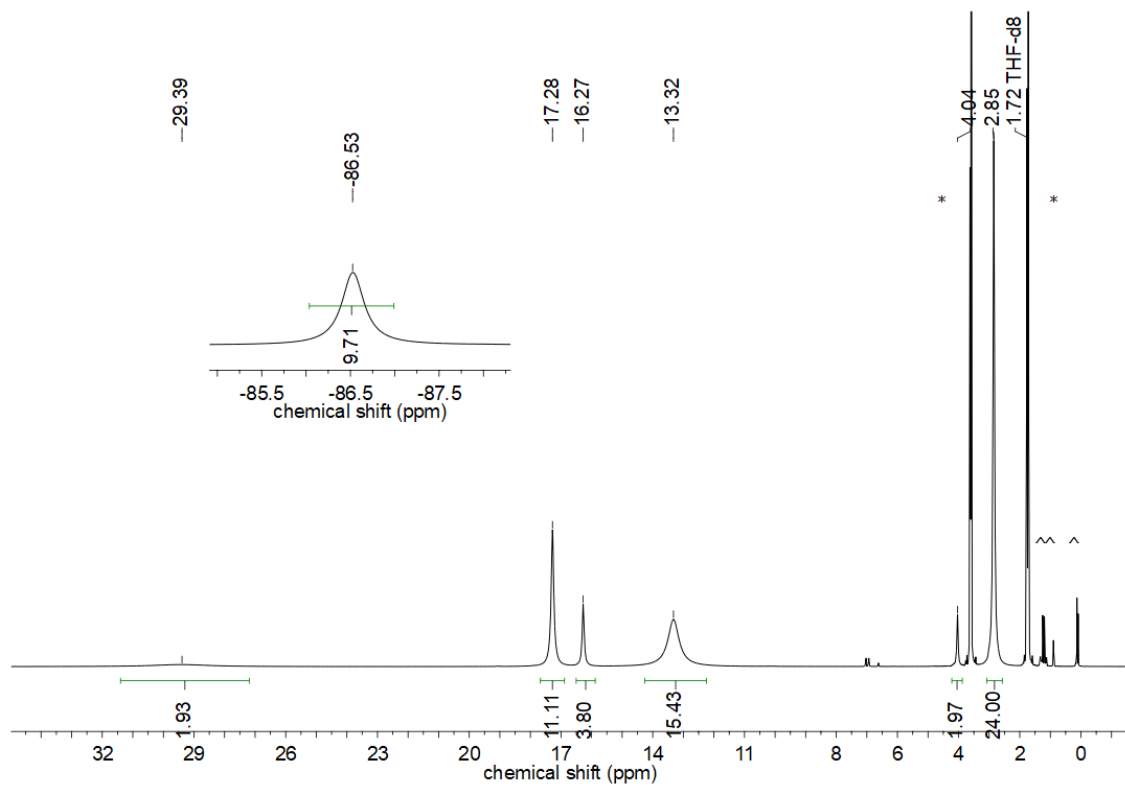

**Figure S 19.**  $^1\text{H}$  NMR spectrum (500.1 MHz) of  $[\text{K}\{18\text{c}6\}][\text{Co}(\text{L}^2)_2]$  in  $\text{THF-}d_8$  at 300 K. (\* solvent, ^ impurities)

### Temperature-dependent $^1\text{H}$ NMR spectra of **4**

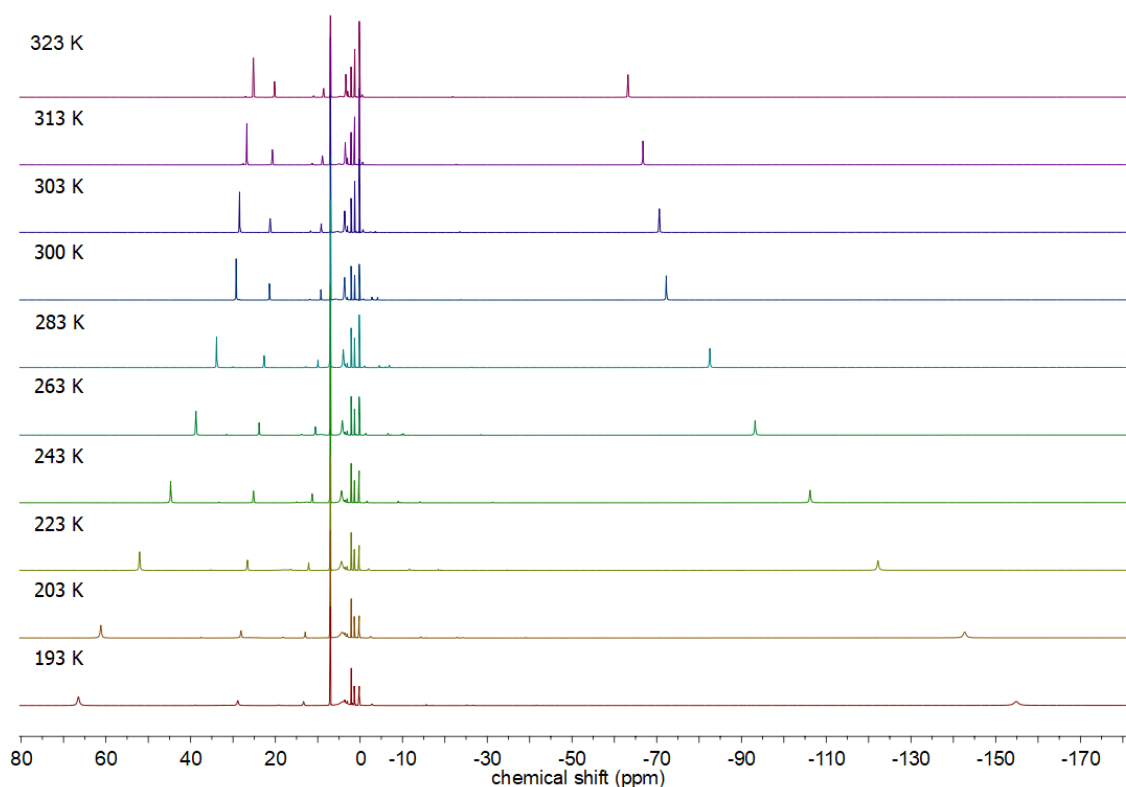

**Figure S 20.** Temperature-dependent  $^1\text{H}$  NMR spectrum (500.1 MHz) of  $[\text{KCo}(\text{L}^2)_2]$  (**4**) in  $\text{toluene-}d_8$  from 323 K to 193 K.

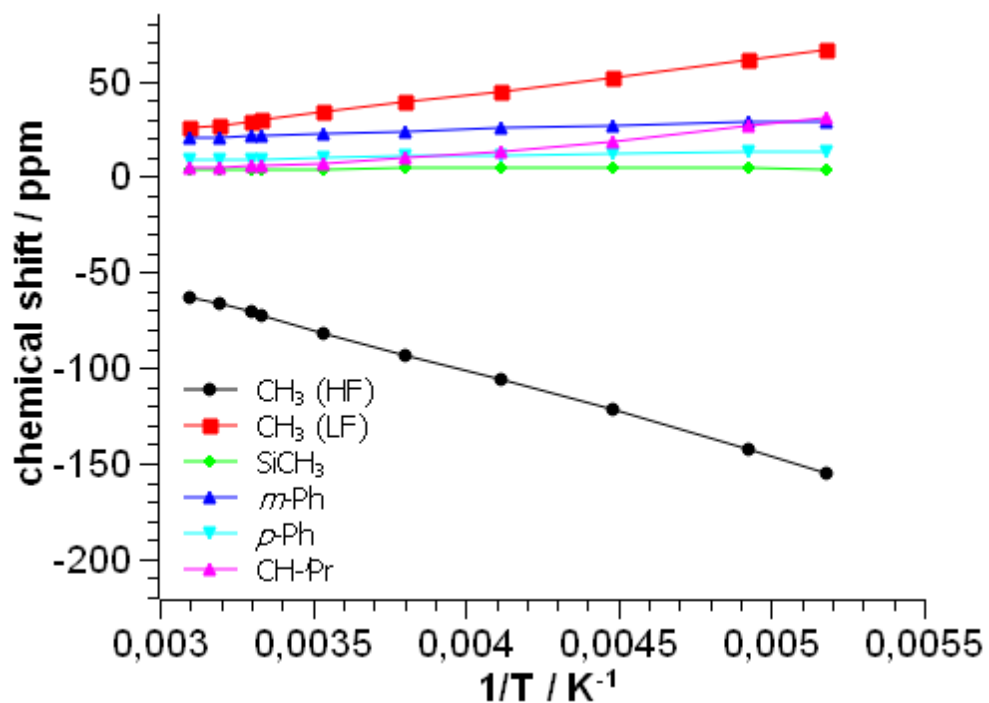

**Figure S 21.** Curie-Weiss plot of the temperature dependent  $^1\text{H}$  NMR spectrum of  $[\text{KCo}(\text{L}^2)_2]$  (**4**) in  $\text{toluene-}d_8$  (HF: high field; LF: low field).

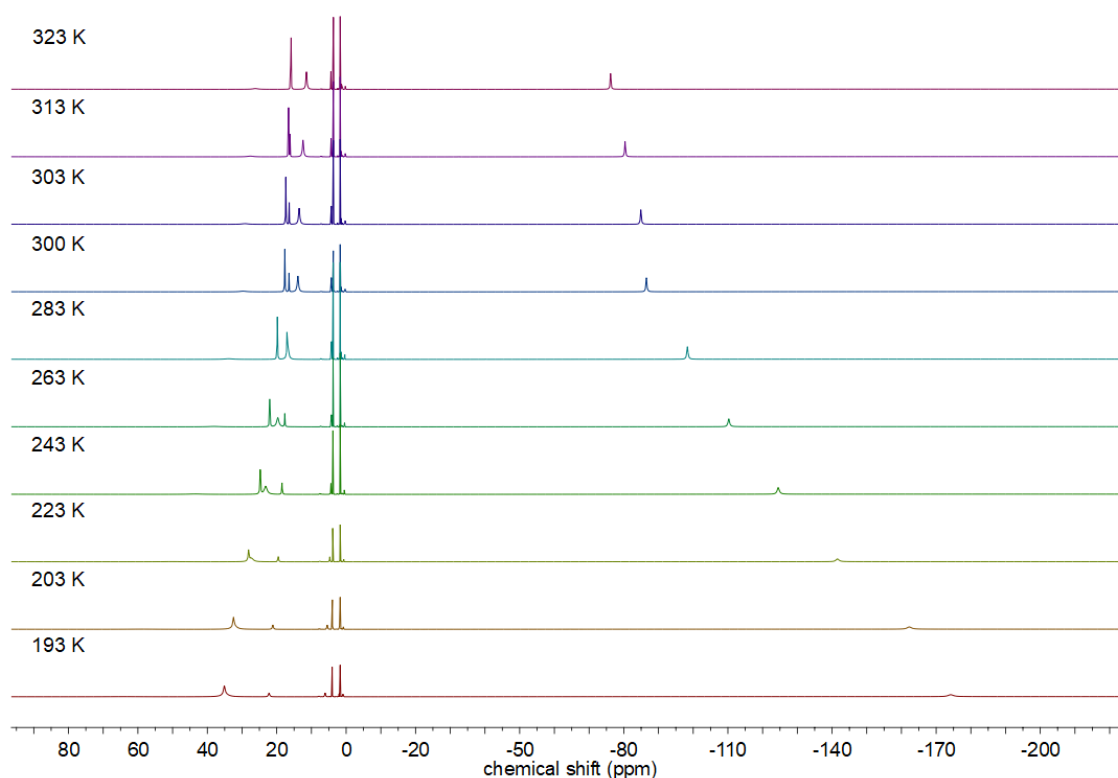

**Figure S 22.** Temperature-dependent  $^1\text{H}$  NMR spectrum (500.1 MHz) of  $[\text{KCo}(\text{L}^2)_2]$  (**4**) in  $\text{THF-}d_8$  from 323 K to 193 K.

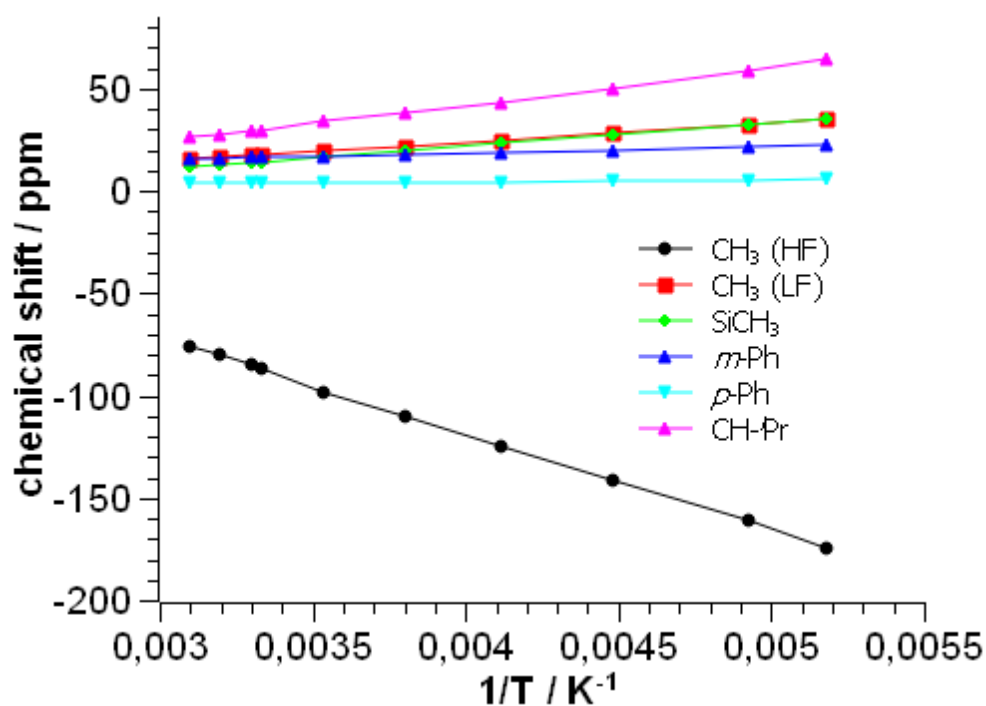

**Figure S 23.** Curie-Weiss plot of the temperature dependent  $^1\text{H}$  NMR spectrum of  $[\text{KCo}(\text{L}^2)_2]$  (**4**) in  $\text{THF-}d_8$  (HF: high field; LF: low field).

### Gradual addition of coordinating solvent to 4 in toluene- $d_8$

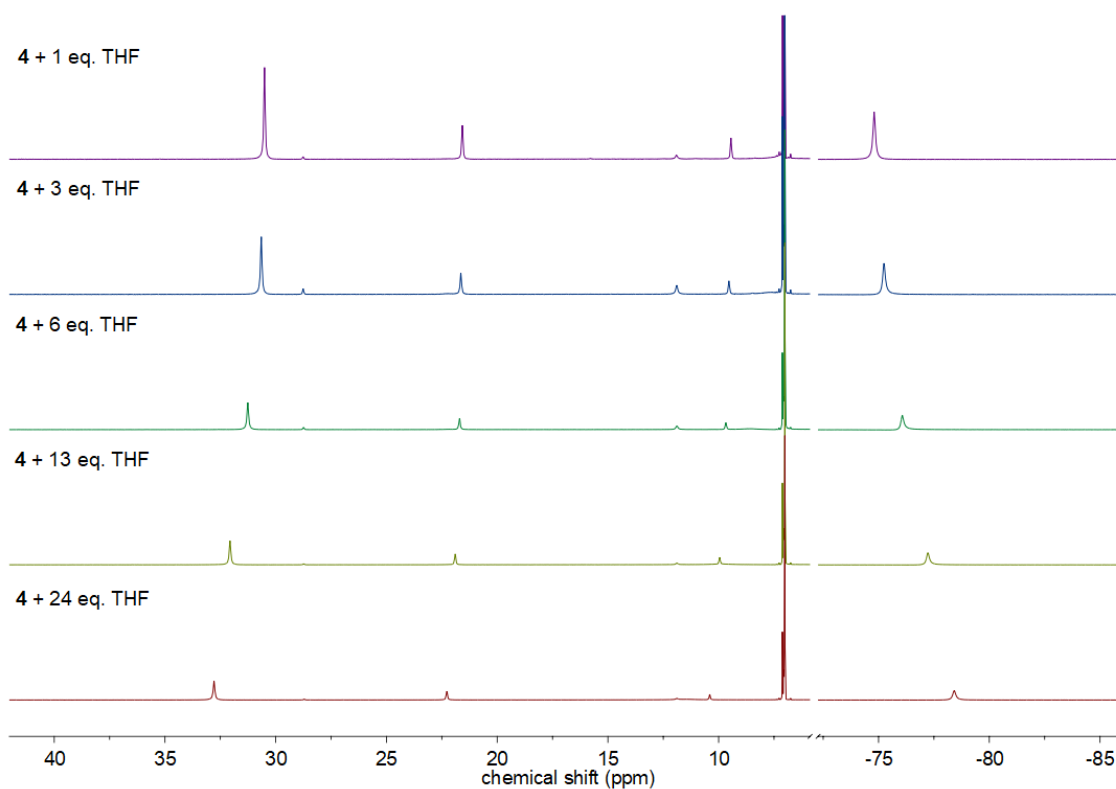

**Figure S 24.** Paramagnetic region of the  $^1\text{H}$  NMR spectrum (300.2 MHz) of  $[\text{KCo}(\text{L}^2)_2]$  (**4**) in toluene- $d_8$  at 300 K by gradual addition of THF.

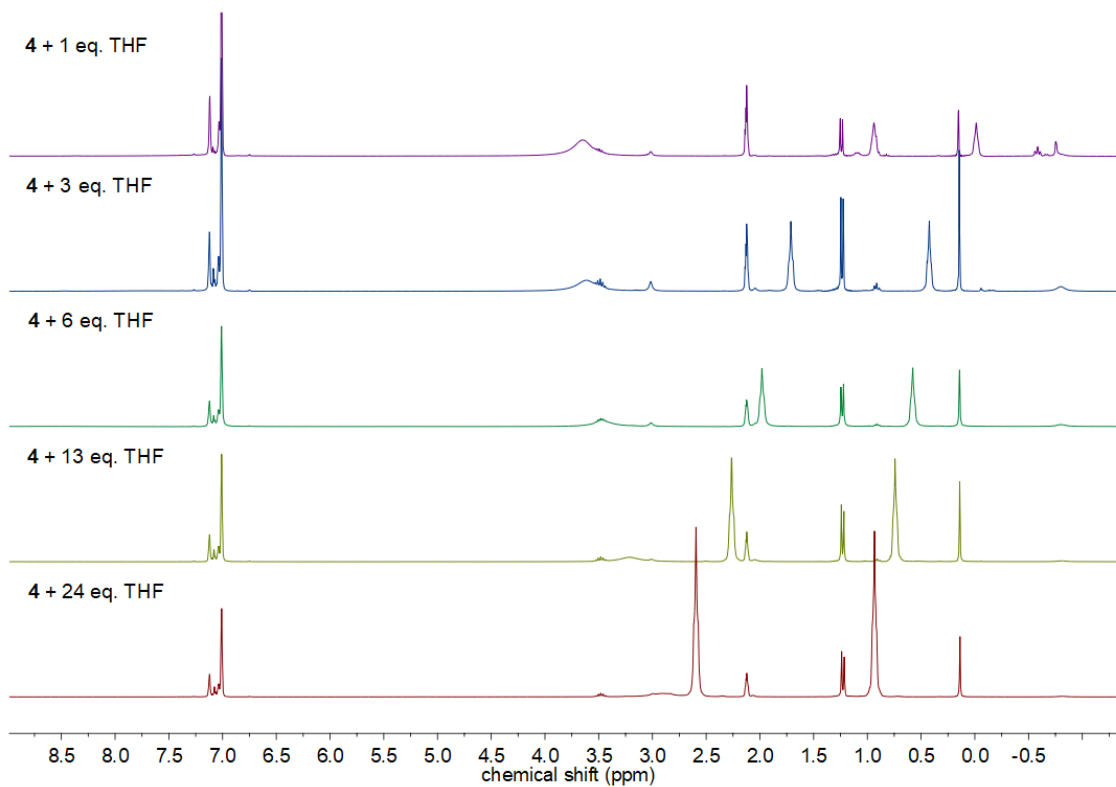

**Figure S 25.** Diamagnetic region of the  $^1\text{H}$  NMR spectrum (300.2 MHz) of  $[\text{KCo}(\text{L}^2)_2]$  (**4**) in toluene- $d_8$  at 300 K by gradual addition of THF.

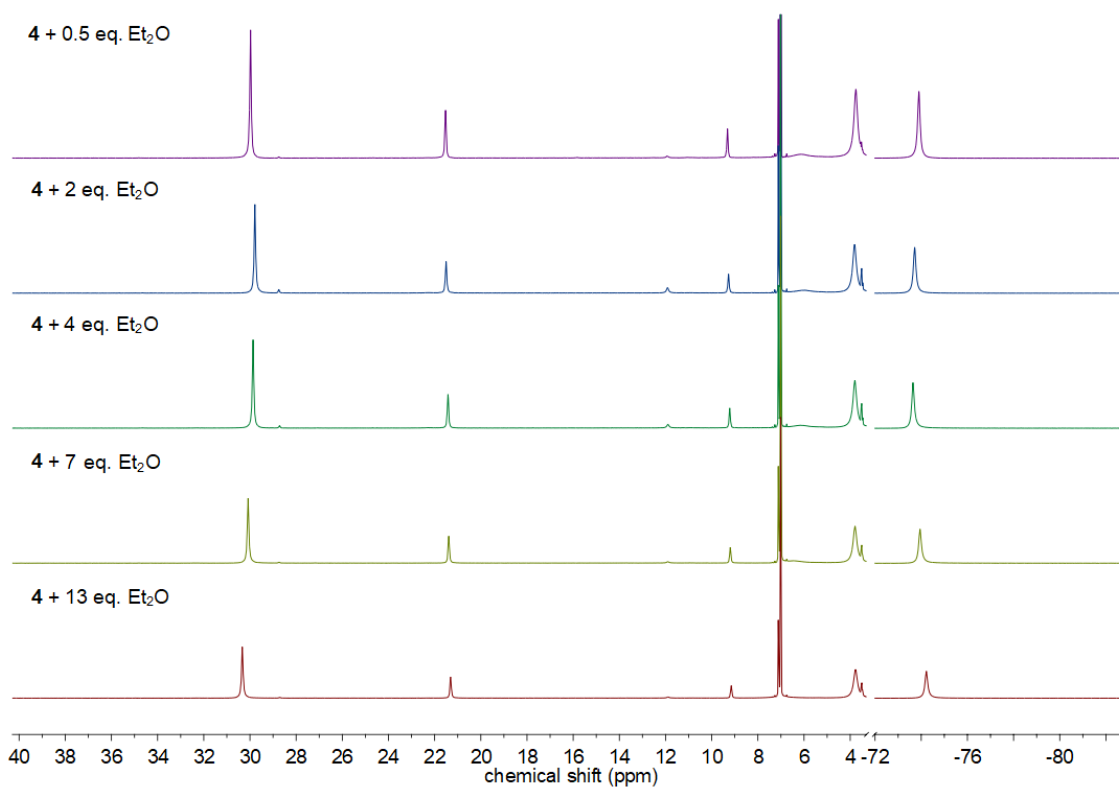

**Figure S 26.** Paramagnetic region of the  $^1\text{H}$  NMR spectrum (300.2 MHz) of  $[\text{KCo}(\text{L}^2)_2]$  (4) in  $\text{toluene-}d_8$  at 300 K by gradual addition of  $\text{Et}_2\text{O}$ .

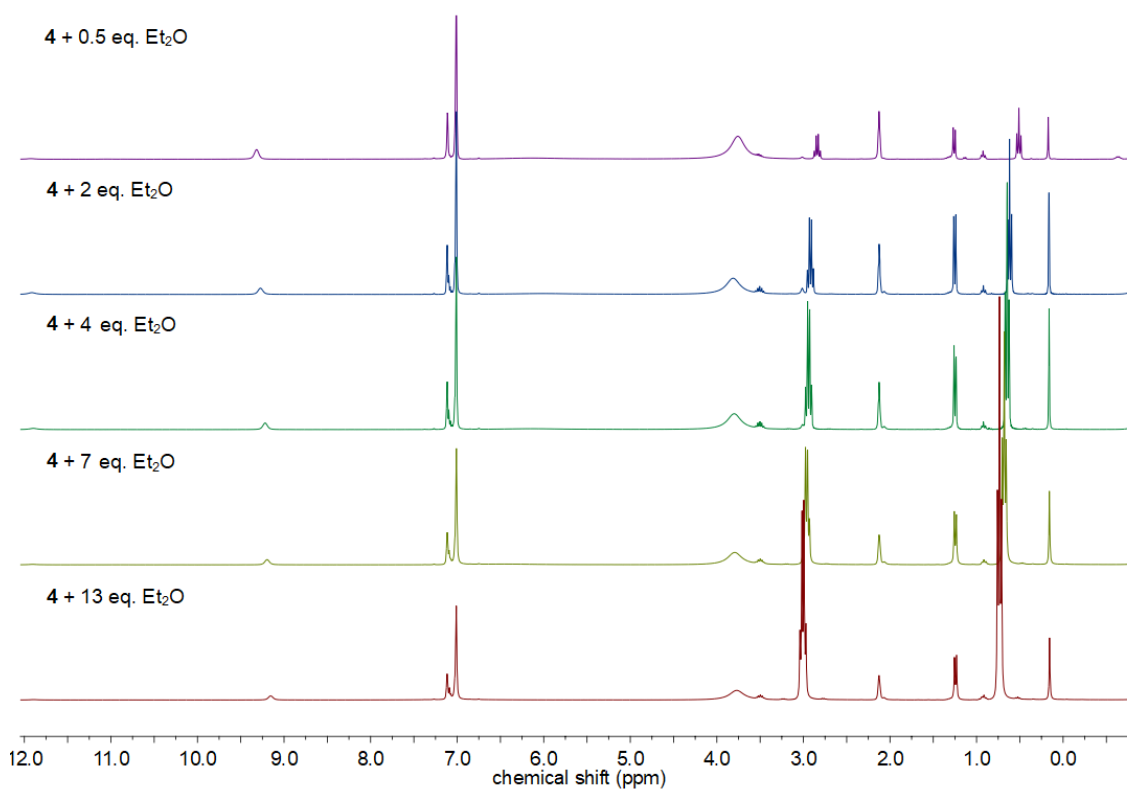

**Figure S 27.** Diamagnetic region of the  $^1\text{H}$  NMR spectrum (300.2 MHz) of  $[\text{KCo}(\text{L}^2)_2]$  (4) in  $\text{toluene-}d_8$  at 300 K by gradual addition of  $\text{Et}_2\text{O}$ .



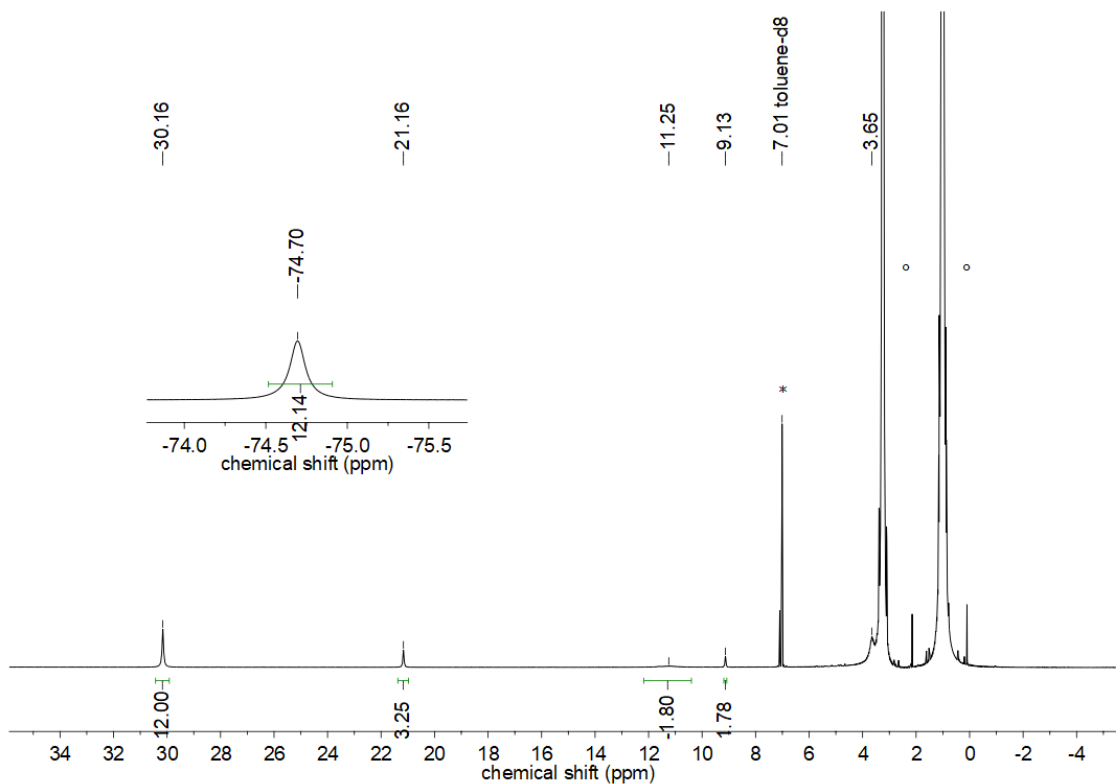

**Figure S 28.**  $^1\text{H}$  NMR spectrum (300.2 MHz) of  $[\text{KCo}(\text{L}^2)_2]$  (**4**) in toluene- $d_8$ / $\text{Et}_2\text{O}$  (1:1 v/v) at 300 K. (\* solvent, ° diethyl ether)

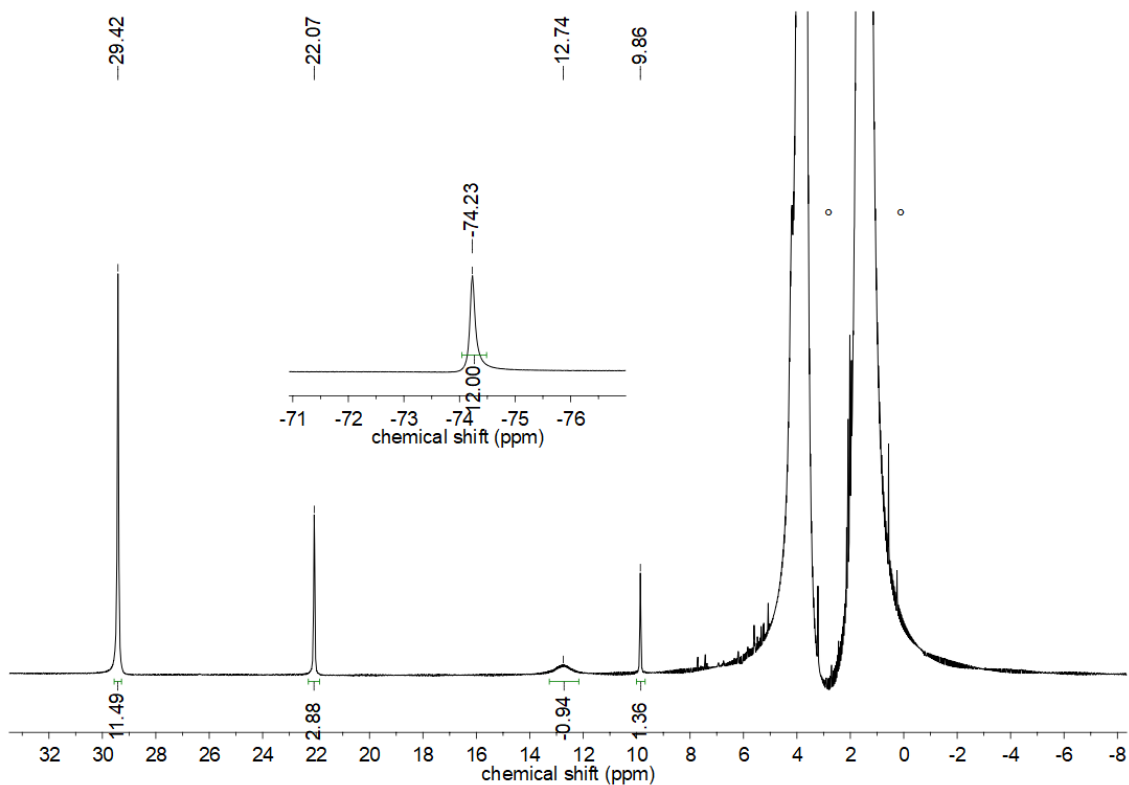

**Figure S 29.**  $^1\text{H}$  NMR spectrum (300.2 MHz) of  $[\text{KCo}(\text{L}^2)_2]$  (**4**) in  $\text{Et}_2\text{O}$  at 300 K. (° diethyl ether)

### $^1\text{H}$ NMR studies of **3** with diethyl ether

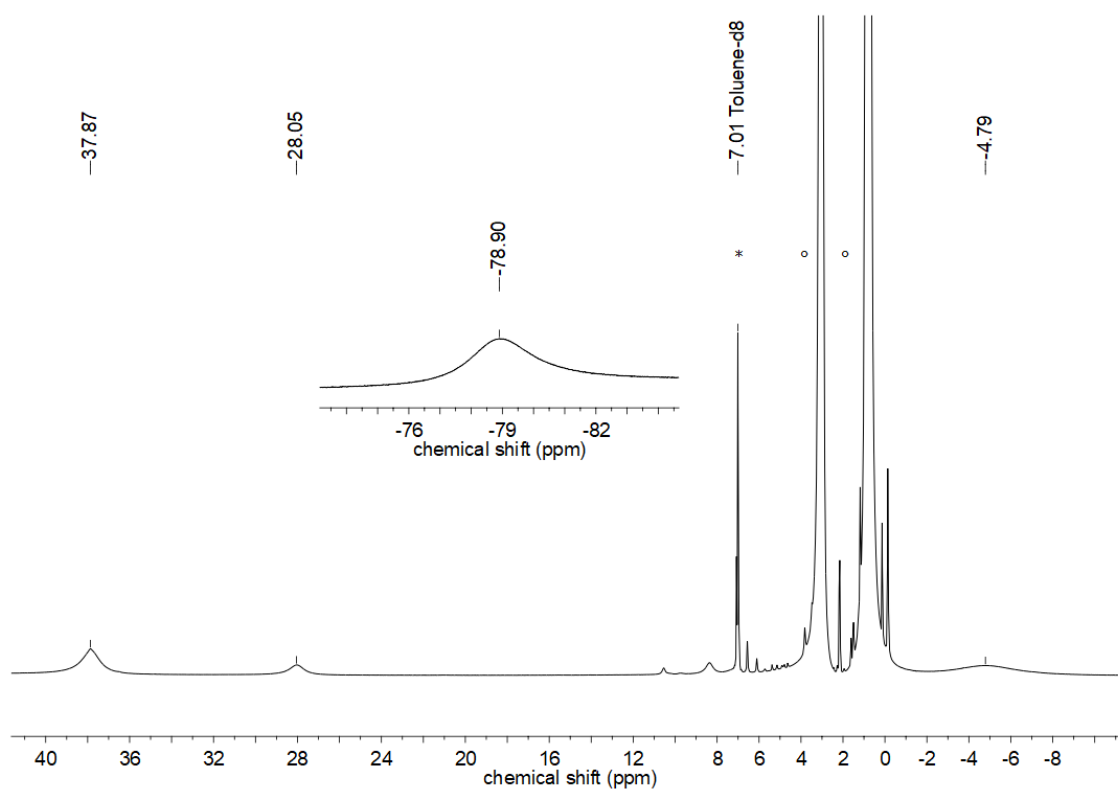

**Figure S 30.**  $^1\text{H}$  NMR spectrum (300.2 MHz) of  $[\text{KFe}(\text{L}^2)_2]$  (**3**) in toluene- $d_8$ /Et $_2$ O (1:1 v/v) at 300 K. (\* solvent, ° diethyl ether)

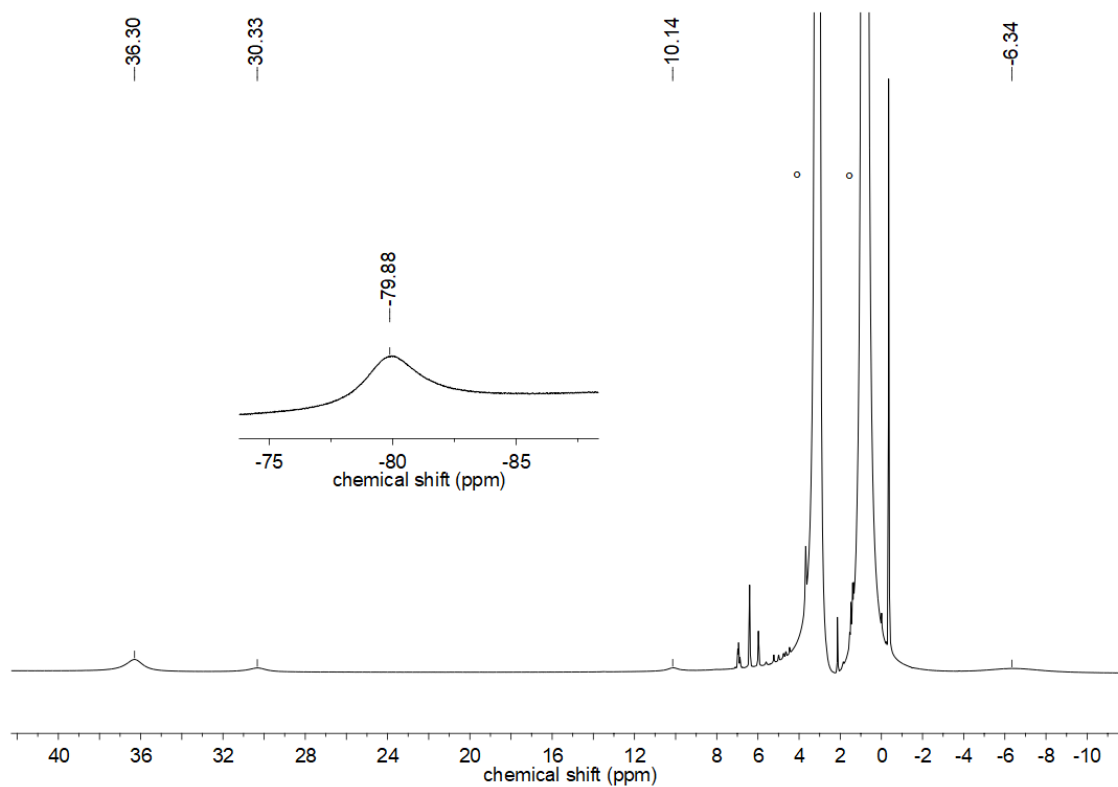

**Figure S 31.**  $^1\text{H}$  NMR spectrum (300.2 MHz) of  $[\text{KFe}(\text{L}^2)_2]$  (**3**) in Et $_2$ O at 300 K. (° diethyl ether)

***In Situ*  $^1\text{H}$  NMR's of reacting 2 and 3 with diphenyl acetylene**

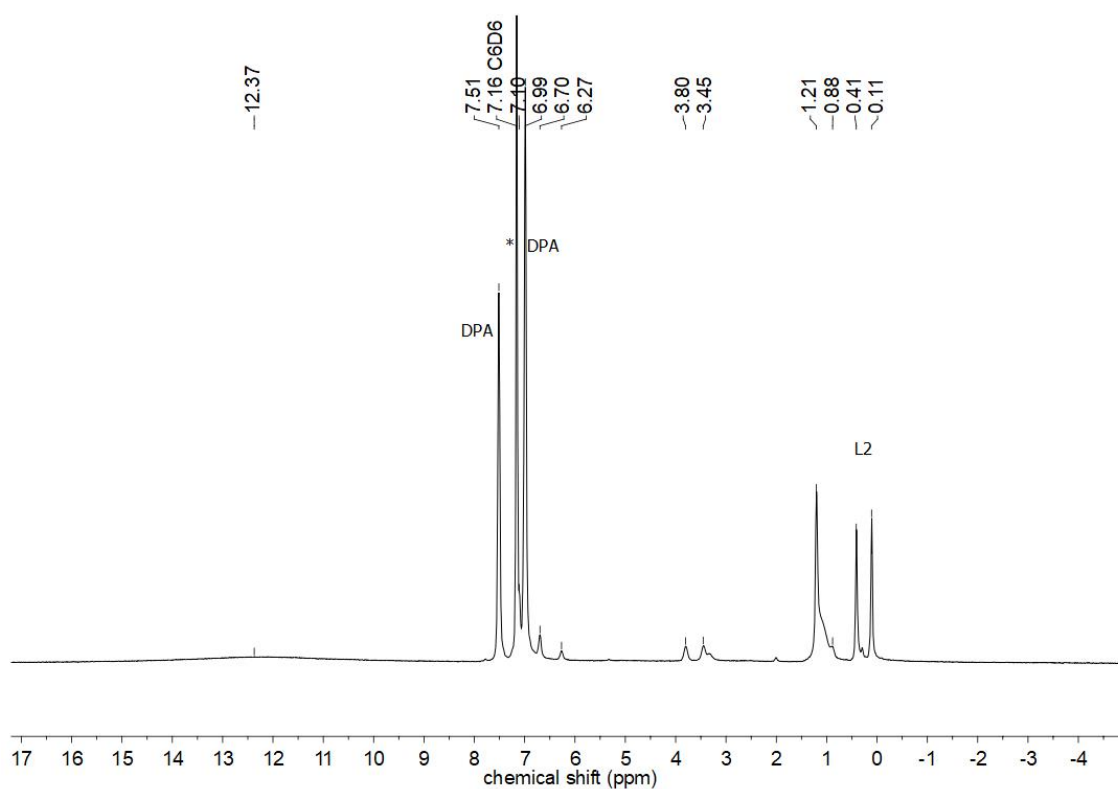

**Figure S 32.** *In Situ*  $^1\text{H}$  NMR spectrum (300.2 MHz) of  $[\text{KMn}(\text{L}^2)_2]$  (**2**) with diphenyl acetylene in  $\text{C}_6\text{D}_6$  at 300 K. (\* solvent,  $^{\text{DPA}}$  diphenyl acetylene,  $^{\text{L}^2}$  released  $\text{KL}^2$  during the reaction)

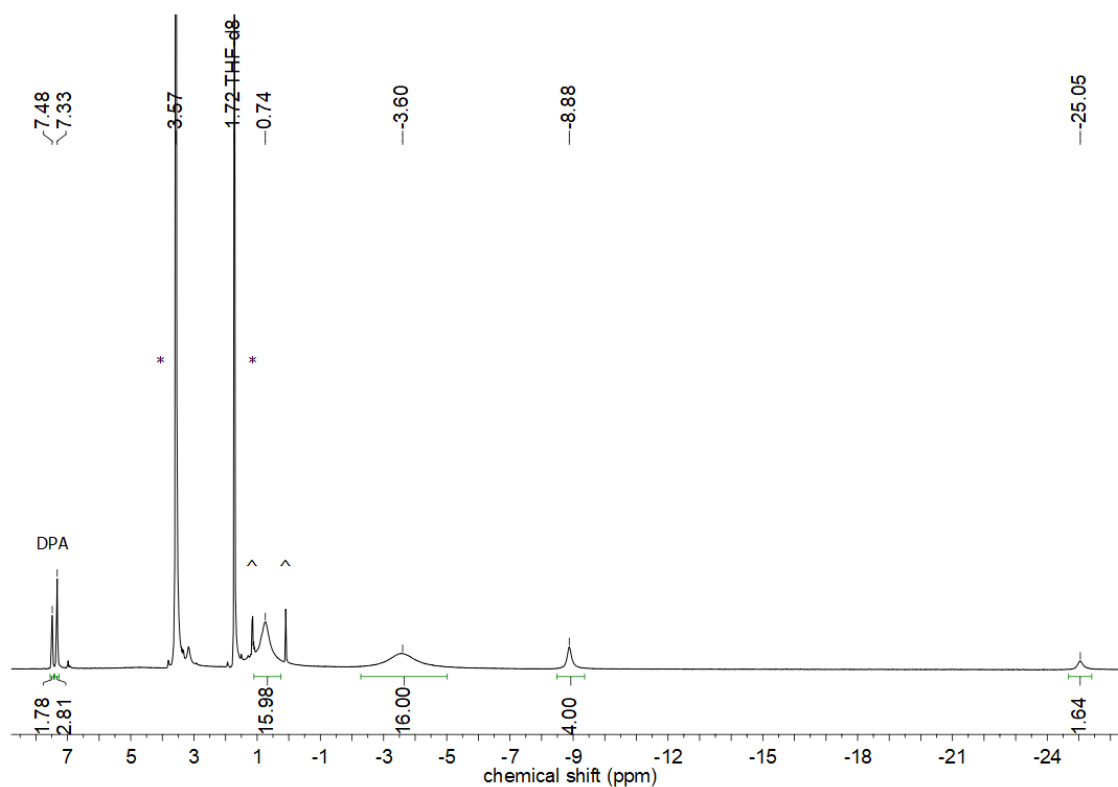

**Figure S 33.** *In Situ*  $^1\text{H}$  NMR spectrum (300.2 MHz) of  $[\text{K}\{18\text{c}6\}][\text{Fe}(\text{L}^2)_2]$  with diphenyl acetylene in  $\text{THF-}d_8$  at 300 K. (\* solvent,  $^{\text{DPA}}$  diphenyl acetylene, ^ impurities)

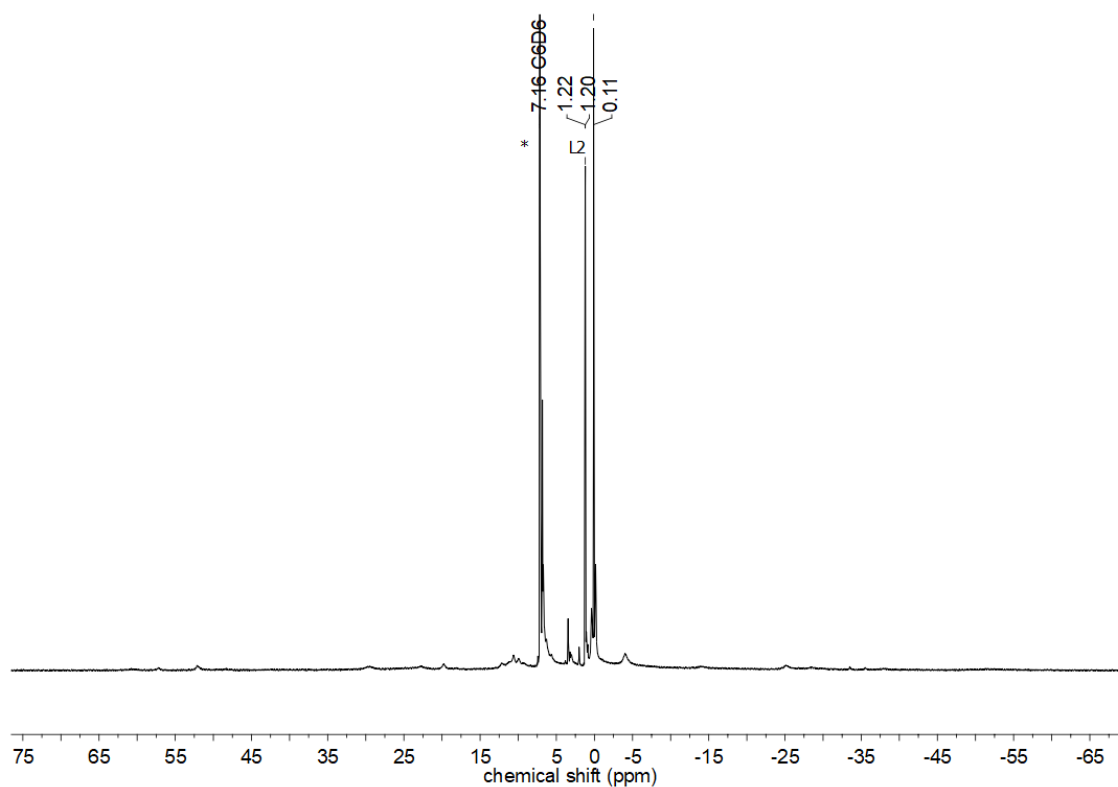

**Figure S 34.** *In Situ*  $^1\text{H}$  NMR spectrum (300.2 MHz) of  $[\text{KFe}(\text{L}^2)_2]$  (**3**) with diphenyl acetylene in  $\text{C}_6\text{D}_6$  at 300 K. (\* solvent,  $\text{L}^2$  released  $\text{KL}^2$  during the reaction)

## 2 UV/Vis spectra

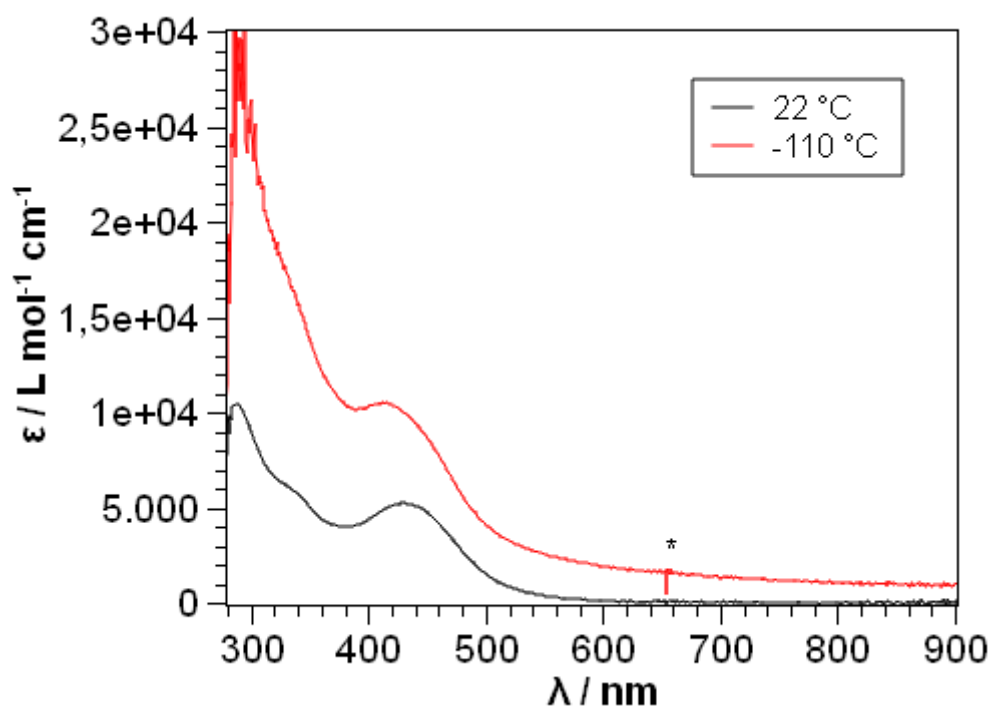

**Figure S 35.** UV/Vis spectrum of [KCr(L<sup>1</sup>)<sub>2</sub>] (1) in toluene. The signal caused by detector exchange is indicated by \*.

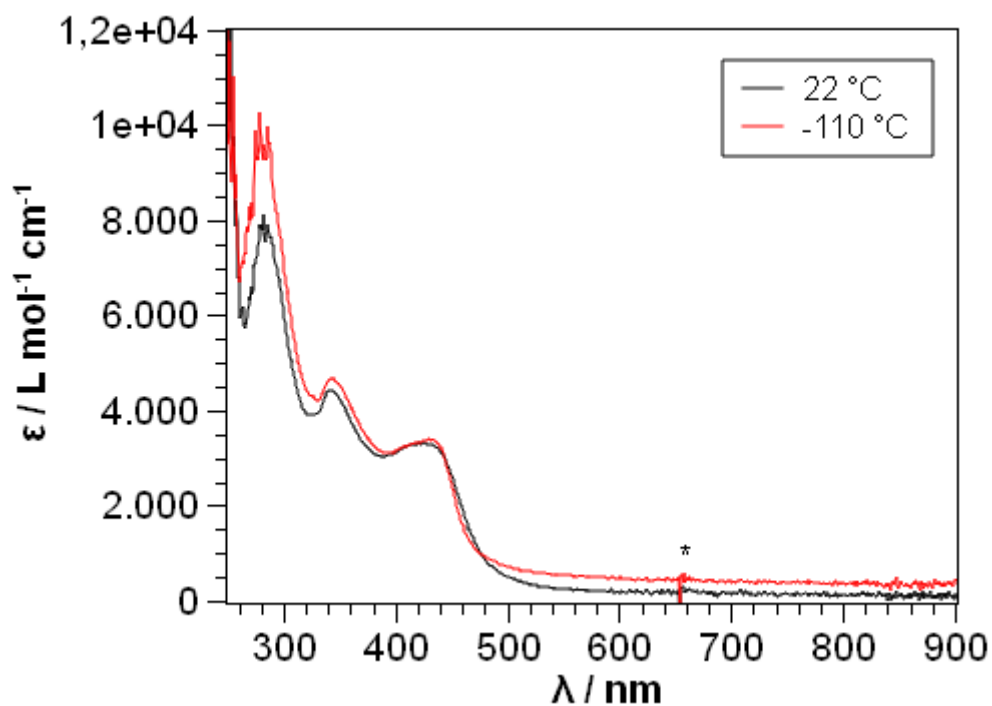

**Figure S 36.** UV/Vis spectrum of [KCr(L<sup>1</sup>)<sub>2</sub>] (1) in THF. The signal caused by detector exchange is indicated by \*.

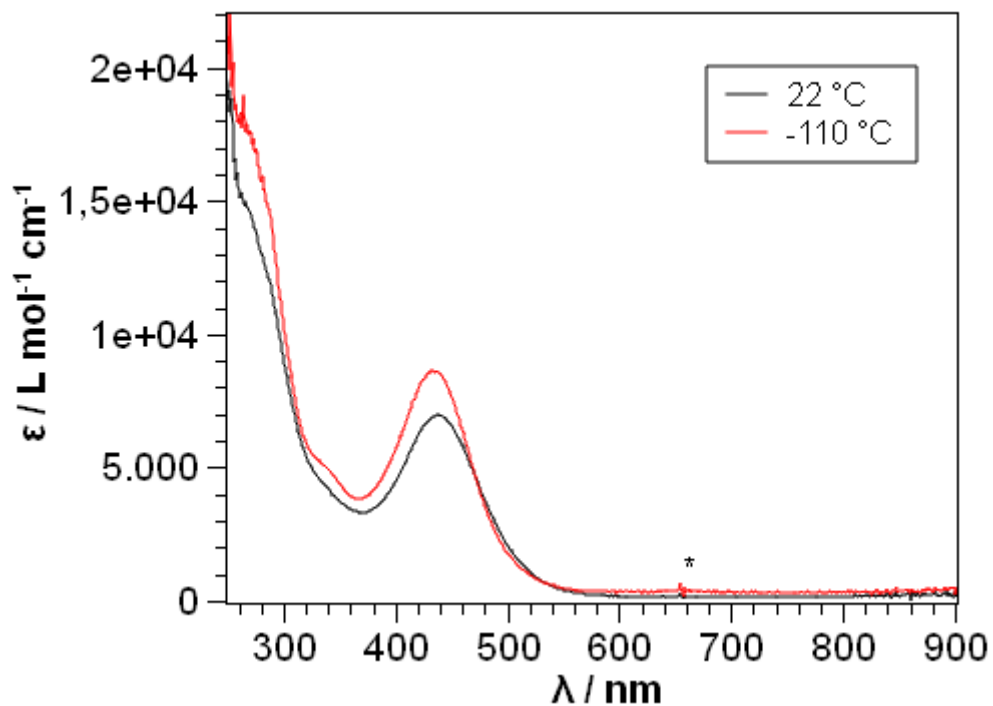

**Figure S 37.** UV/Vis spectrum of  $[\text{KCr}(\text{L}^1)_2]$  (**1**) in  $\text{Et}_2\text{O}$ . The signal caused by detector exchange is indicated by \*.

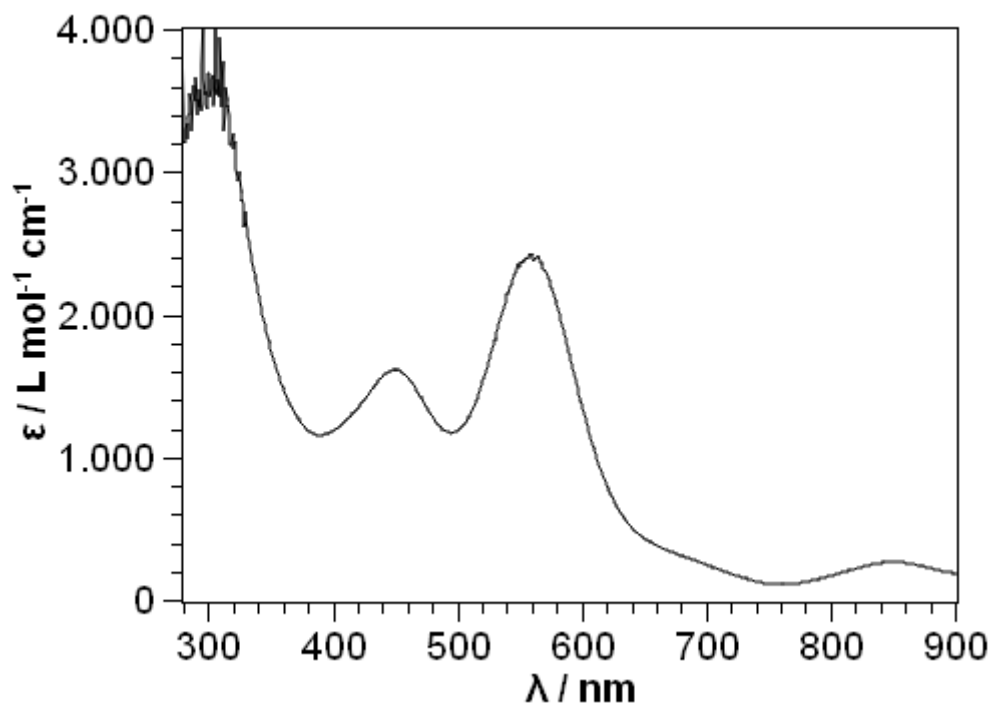

**Figure S 38.** UV/Vis spectrum of  $[\text{KMn}(\text{L}^2)_2]$  (**2**) in  $\text{Et}_2\text{O}$ .

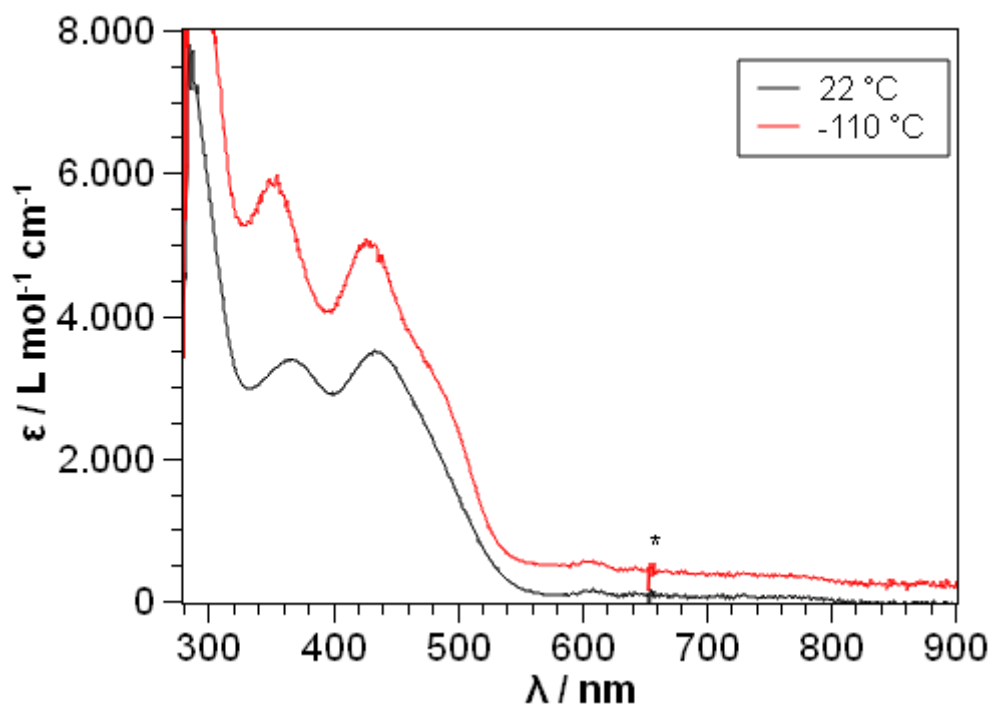

**Figure S 39.** UV/Vis spectrum of  $[\text{KFe}(\text{L}^2)_2]$  (**3**) in toluene. The signal caused by detector exchange is indicated by \*.

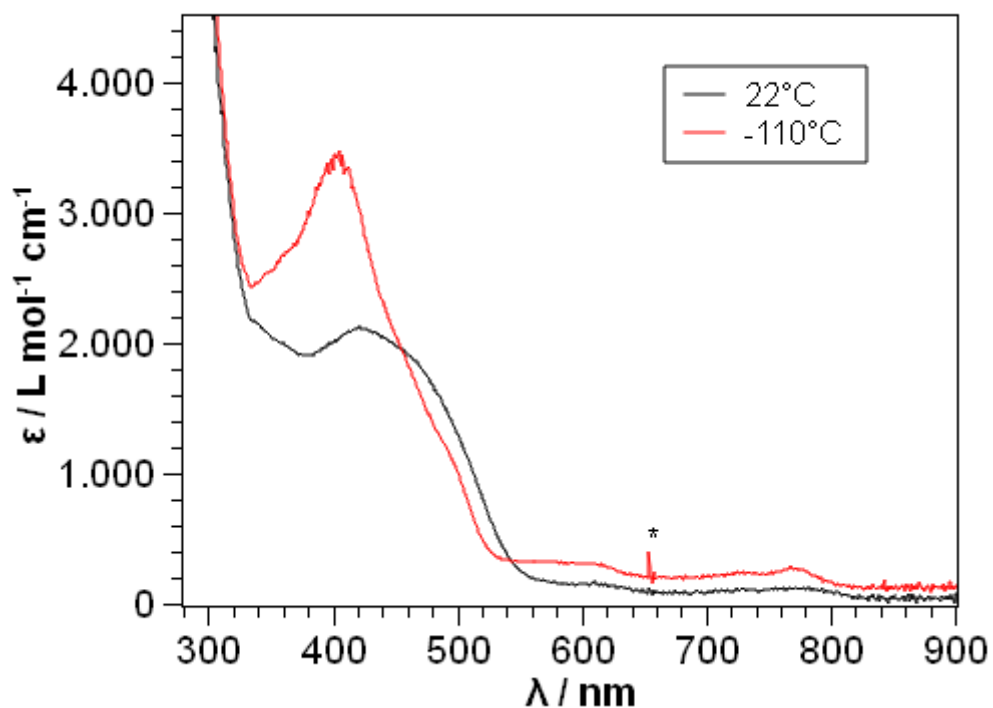

**Figure S 40.** UV/Vis spectrum of  $[\text{KFe}(\text{L}^2)_2]$  (**3**) in THF. The signal caused by detector exchange is indicated by \*.

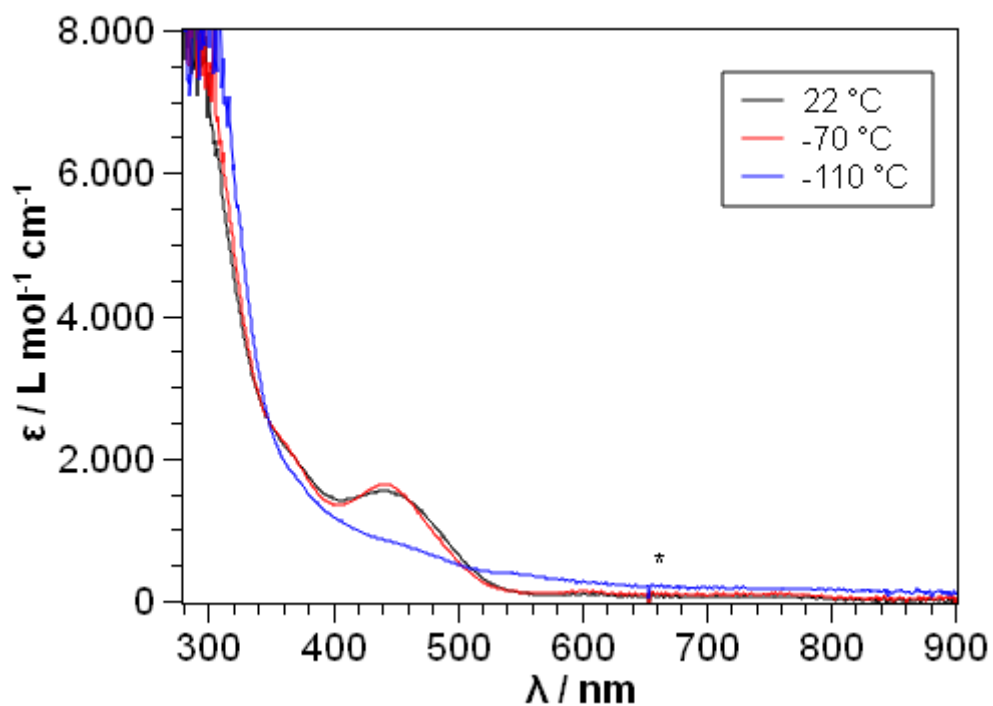

**Figure S 41.** UV/Vis spectrum of [KFe(L<sup>2</sup>)<sub>2</sub>] (3) in Et<sub>2</sub>O. The signal caused by detector exchange is indicated by \*.

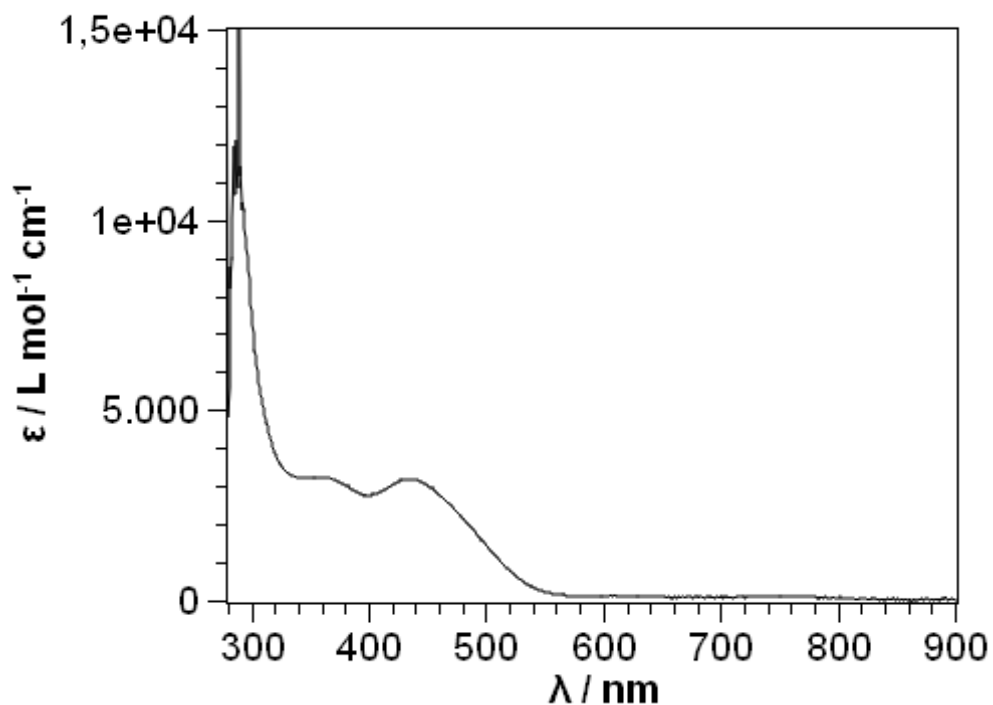

**Figure S 42.** UV/Vis spectrum of [K(DMAP)<sub>2</sub>Fe(L<sup>2</sup>)<sub>2</sub>] (3.2DMAP) in toluene.



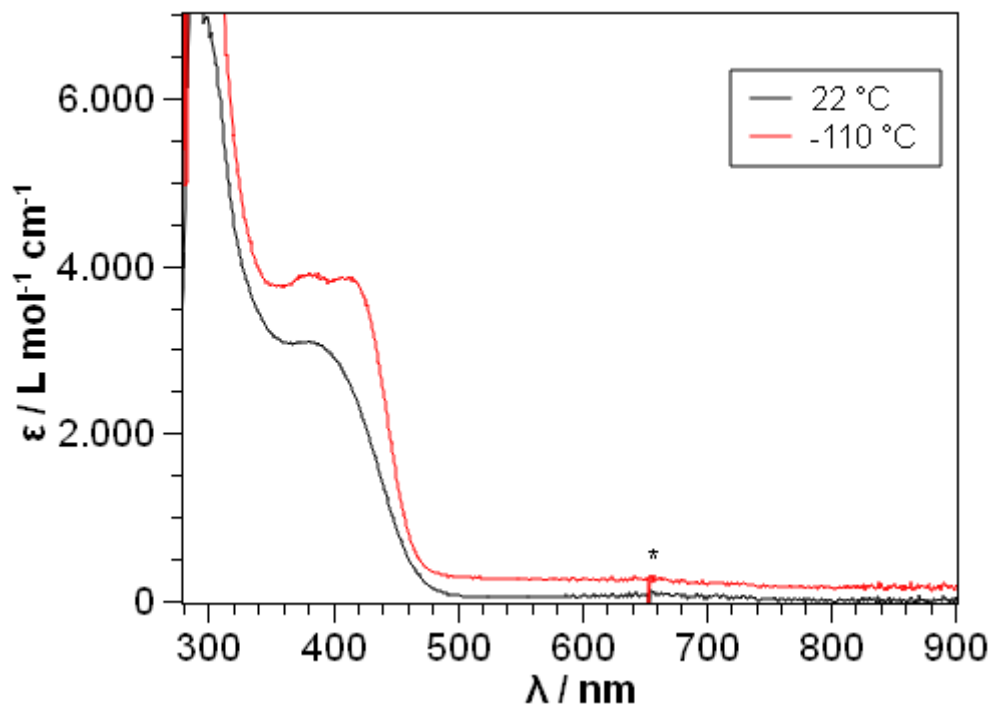

**Figure S 43.** UV/Vis spectrum of  $[\text{KCo}(\text{L}^2)_2]$  (**4**) in toluene. The signal caused by detector exchange is indicated by \*.

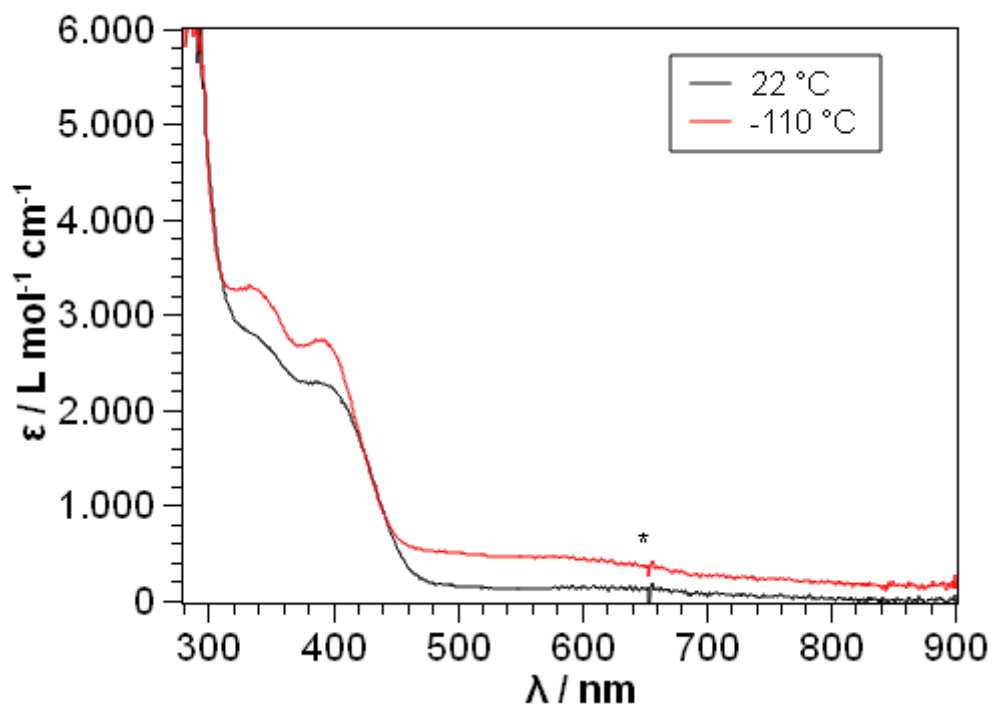

**Figure S 44.** UV/Vis spectrum of  $[\text{KCo}(\text{L}^2)_2]$  (**4**) in THF. The signal caused by detector exchange is indicated by \*.

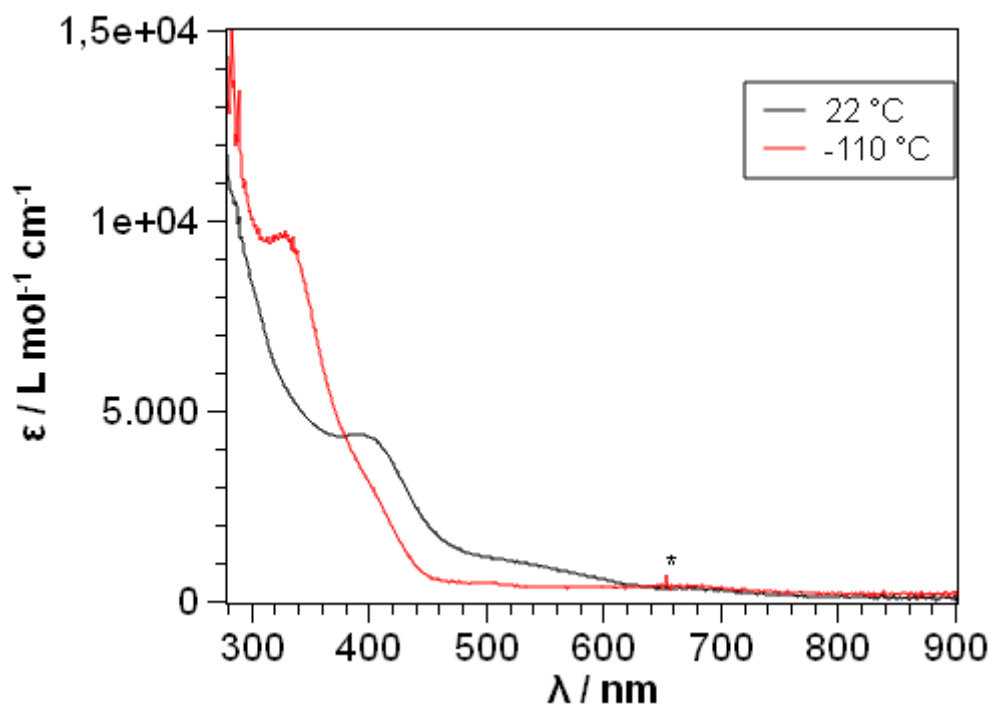

**Figure S 45.** UV/Vis spectrum of  $[\text{KCo}(\text{L}^2)_2]$  (**4**) in  $\text{Et}_2\text{O}$ . The signal caused by detector exchange is indicated by \*.

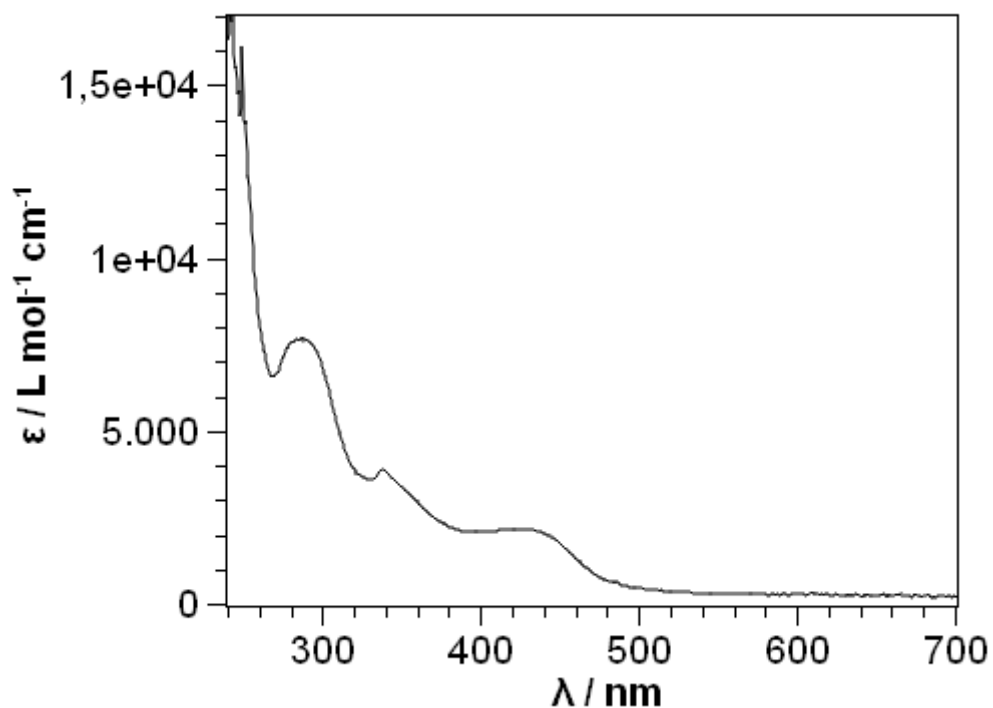

**Figure S 46.** UV/Vis spectrum of  $[\text{K}\{18\text{c}6\}][\text{Cr}(\text{L}^1)_2]$  (**5**) in THF.

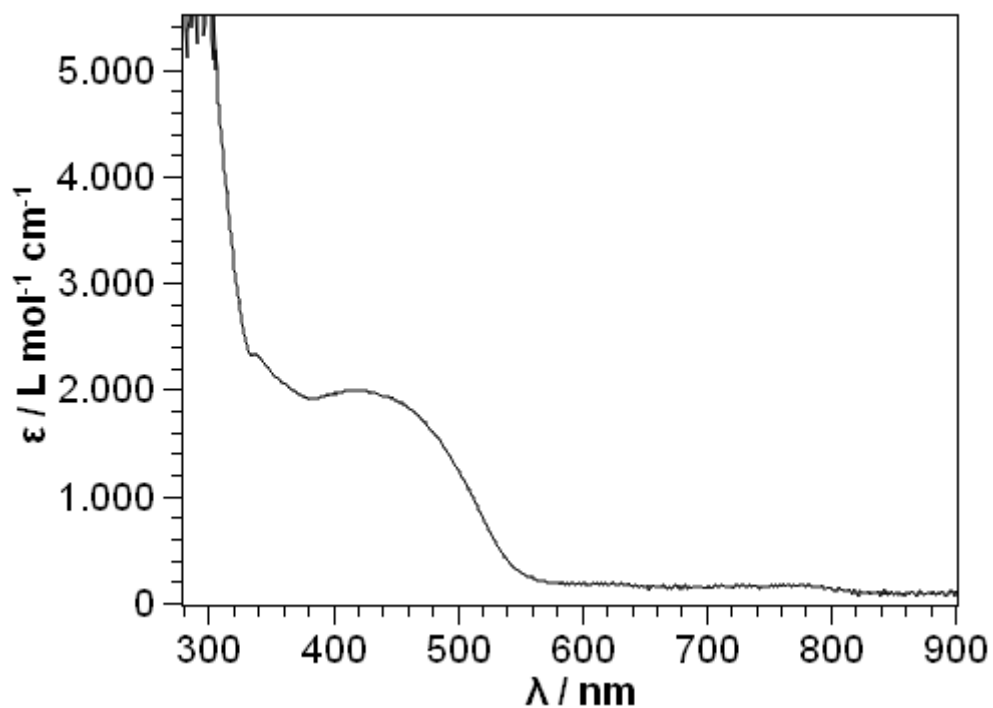

**Figure S 47.** UV/Vis spectrum of  $[\text{Li}\{12\text{c}4\}_2][\text{Fe}(\text{L}^2)_2]$  (**6**) in THF.

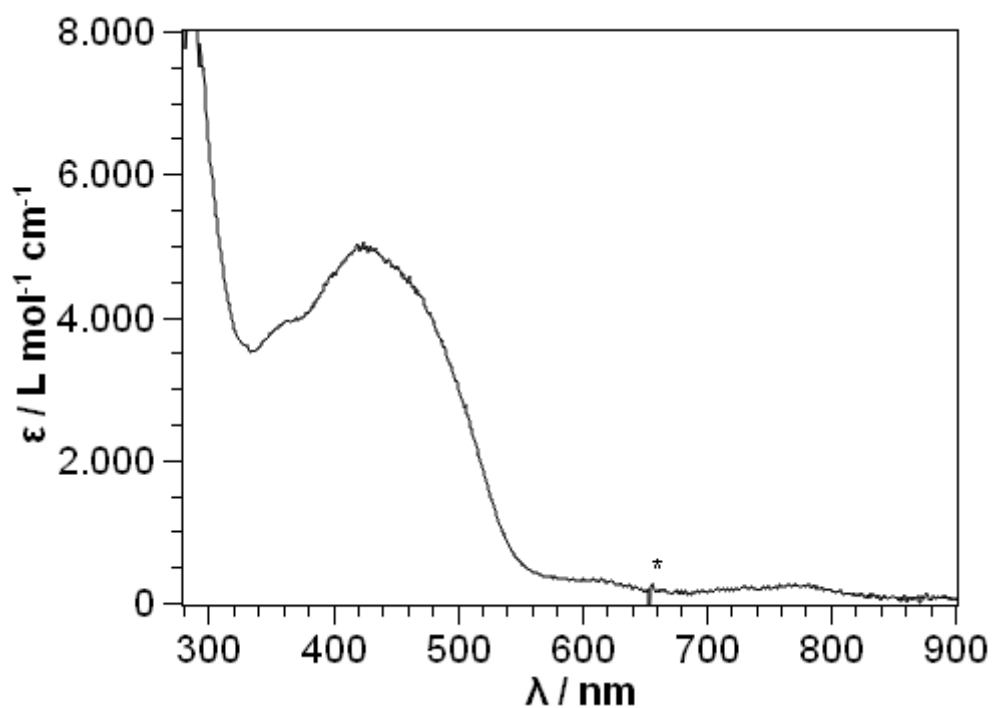

**Figure S 48.** UV/Vis spectrum of  $[\text{Na}\{18\text{c}6\}][\text{Fe}(\text{L}^2)_2]$  (**7**) in THF. The signal caused by detector exchange is indicated by \*.

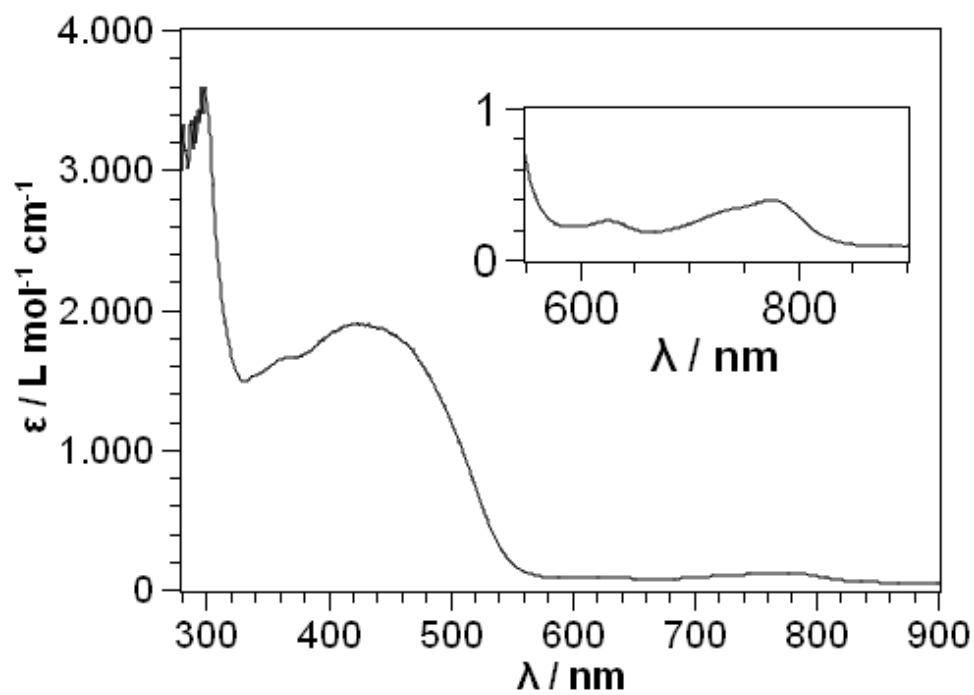

**Figure S 49.** UV/Vis spectrum of  $[\text{NBu}_4][\text{Fe}(\text{L}^2)_2]$  (**8**) in THF.

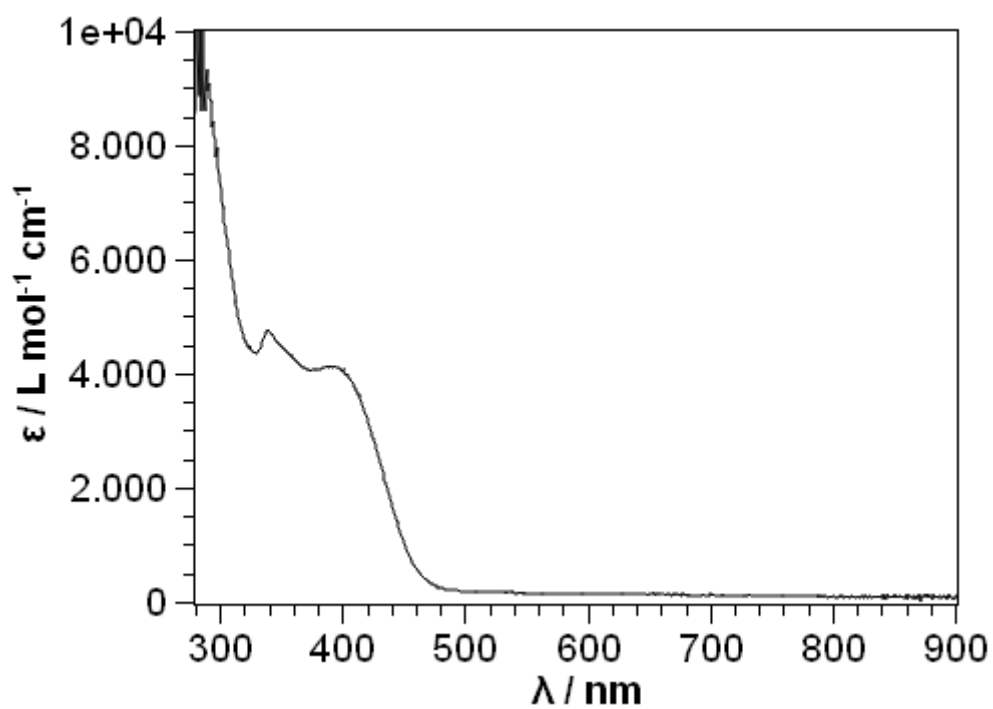

**Figure S 50.** UV/Vis spectrum of  $[\text{NBu}_4][\text{Co}(\text{L}^2)_2]$  (**9**) in THF.

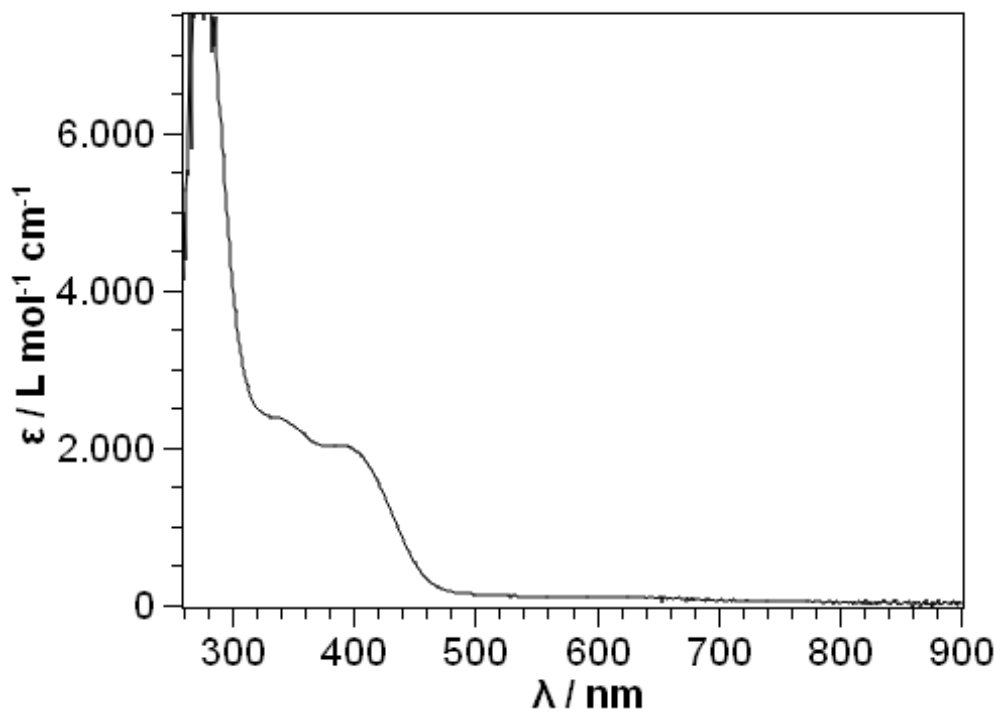

**Figure S 51.** UV/Vis spectrum of [K{18c6}][Co(L<sup>2</sup>)<sub>2</sub>] in THF.

**Table S 1.** Location of UV/Vis absorption maxima in compounds **1 – 9** and [K{18c6}][M(L<sup>2</sup>)<sub>2</sub>] (M = Fe, Co, L<sup>2</sup> = -N(Dipp)SiMe<sub>3</sub>) in the range from 280 – 900 nm. \*UV/Vis spectrum was recorded but no absorption coefficients were given in the original report.

|           |                                                            | solvent           | T                                  | $\lambda(\epsilon) / \text{nm}(\text{Lmol}^{-1}\text{cm}^{-1})$ |
|-----------|------------------------------------------------------------|-------------------|------------------------------------|-----------------------------------------------------------------|
| <b>Cr</b> | <b>1</b>                                                   | toluene           | r.t.                               | 431 (5210)                                                      |
|           |                                                            |                   | -100 °C                            | 419 (10430)                                                     |
|           |                                                            | THF               | r.t.                               | 286 (>7930), 343 (4440), 426 (3320)                             |
|           |                                                            |                   | -100 °C                            | 286 (9980), 343 (4680), 428 (3370)                              |
|           |                                                            | Et <sub>2</sub> O | r.t.                               | 435 (6940)                                                      |
|           |                                                            |                   | -100 °C                            | 433 (8670)                                                      |
| <b>5</b>  | THF                                                        | r.t.              | 288 (7710), 338 (3880), 421 (2160) |                                                                 |
| <b>Mn</b> | <b>2</b>                                                   | Et <sub>2</sub> O | r.t.                               | 448 (1610), 565 (2410), 849 (2650)                              |
| <b>Fe</b> | <b>3</b>                                                   | toluene           | r.t.                               | 368 (3380), 432 (3490), 602 (140)                               |
|           |                                                            |                   | -100 °C                            | 355 (5970), 430 (5040), 606 (560)                               |
|           |                                                            | THF               | r.t.                               | 421 (2120), 610 (160), 773 (120)                                |
|           |                                                            |                   | -100 °C                            | 408 (3430), 610 (310), 771 (480)                                |
|           |                                                            | Et <sub>2</sub> O | r.t.                               | 442 (1540), 601 (100)                                           |
|           |                                                            |                   | -100 °C                            | no maximum                                                      |
|           | <b>3.2DMAP</b>                                             | toluene           | r.t.                               | 360 (3230), 434 (3190), 607 (130)                               |
|           | <b>6</b>                                                   | THF               | r.t.                               | 422 (1990), 771 (170)                                           |
|           | <b>7</b>                                                   | THF               | r.t.                               | 420 (5020), 613 (320), 771 (260)                                |
|           | <b>8</b>                                                   | THF               | r.t.                               | 364 (1660), 420 (1900)                                          |
|           | <b>K{18c6}[Fe(L<sup>2</sup>)<sub>2</sub>]<sup>1</sup></b>  | THF               | r.t.                               | 428 (4000), 626 (100)                                           |
| <b>Co</b> | <b>4</b>                                                   | toluene           | r.t.                               | 385 (3080)                                                      |
|           |                                                            |                   | -100 °C                            | 387 (3910), 410 (3850)                                          |
|           |                                                            | THF               | r.t.                               | 336 (2800), 385 (2300)                                          |
|           |                                                            |                   | -100 °C                            | 334 (3300), 388 (2740)                                          |
|           |                                                            | Et <sub>2</sub> O | r.t.                               | 393 (3560)                                                      |
|           |                                                            |                   | -100 °C                            | 334 (9540)                                                      |
|           | <b>9</b>                                                   | THF               | r.t.                               | 340 (4770), 390 (4120)                                          |
|           | <b>K{18c6}[Co(L<sup>2</sup>)<sub>2</sub>]<sup>*1</sup></b> | THF               | r.t.                               | 337 (2380), 391 (2030), 629 (100)                               |

### 3 IR spectra

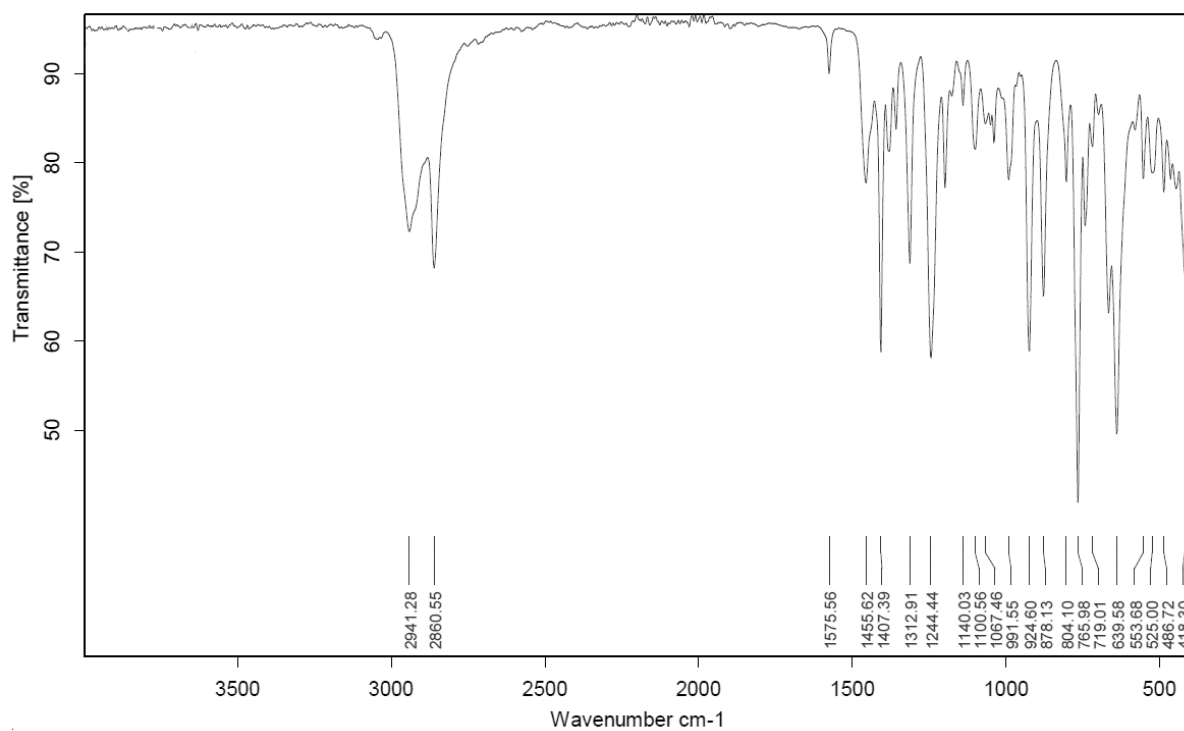

Figure S 52. IR spectrum of [KCr(L<sup>1</sup>)<sub>2</sub>]<sub>n</sub> (1).

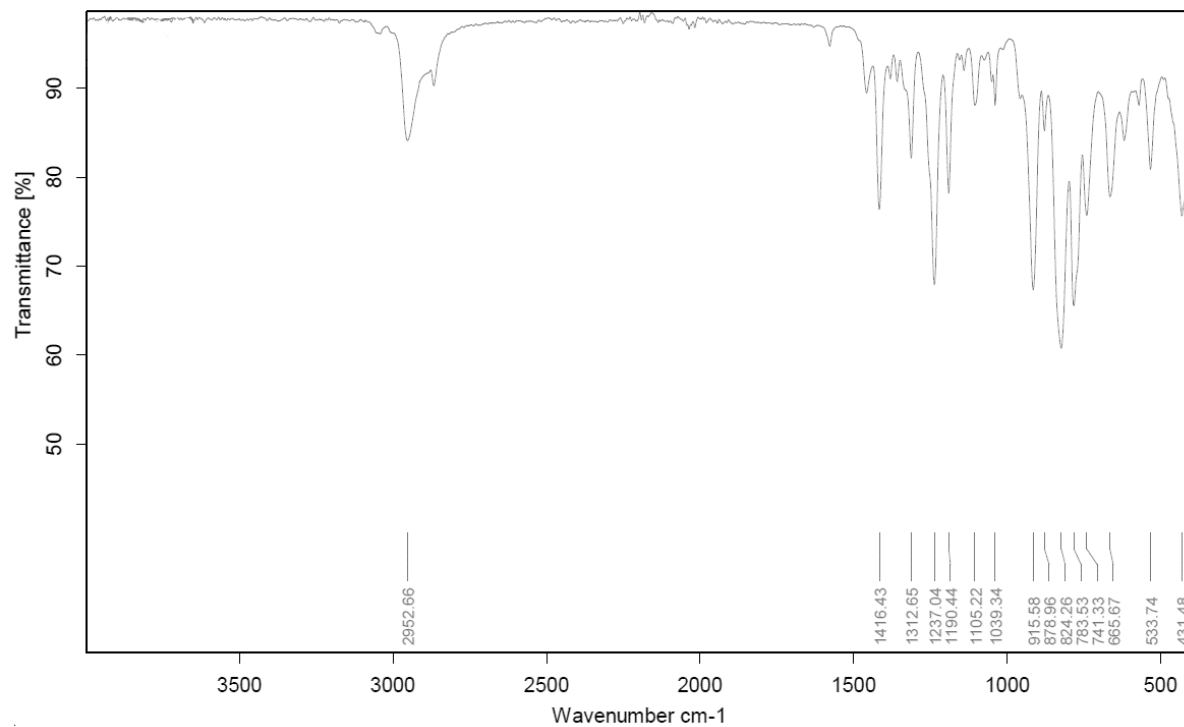

Figure S 53. IR spectrum of [KMn(L<sup>2</sup>)<sub>2</sub>] (2).

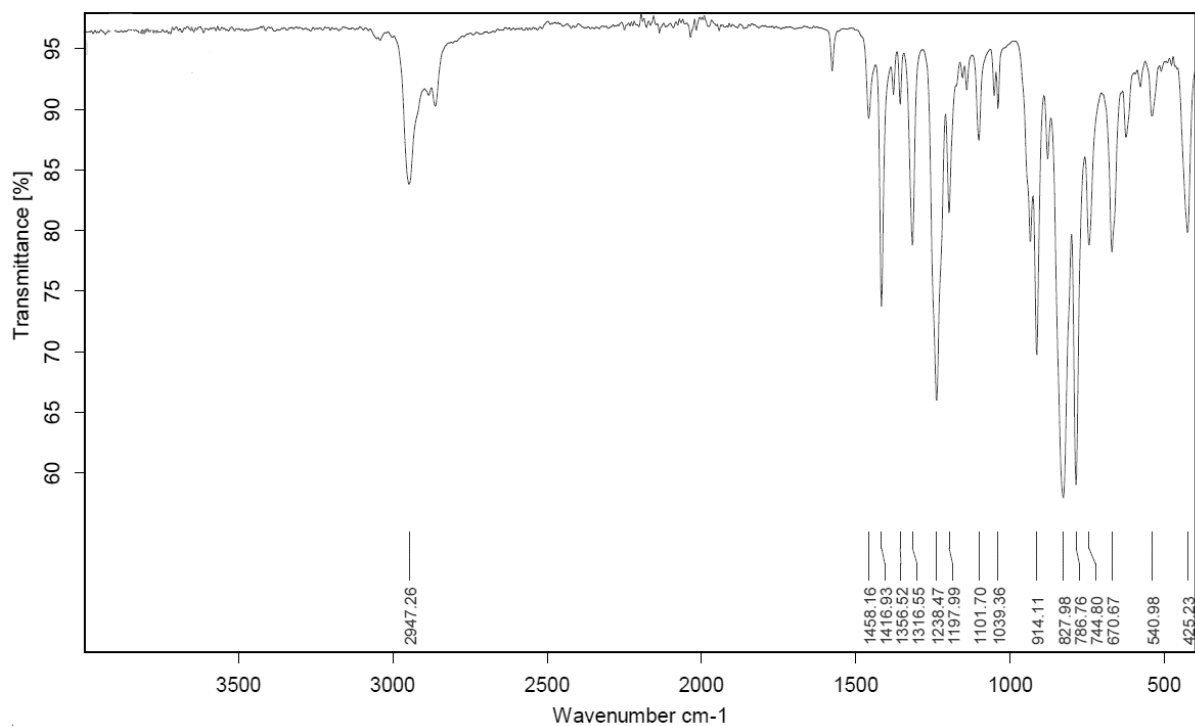

**Figure S 54.** IR spectrum of [KFe(L<sup>2</sup>)<sub>2</sub>] (3).

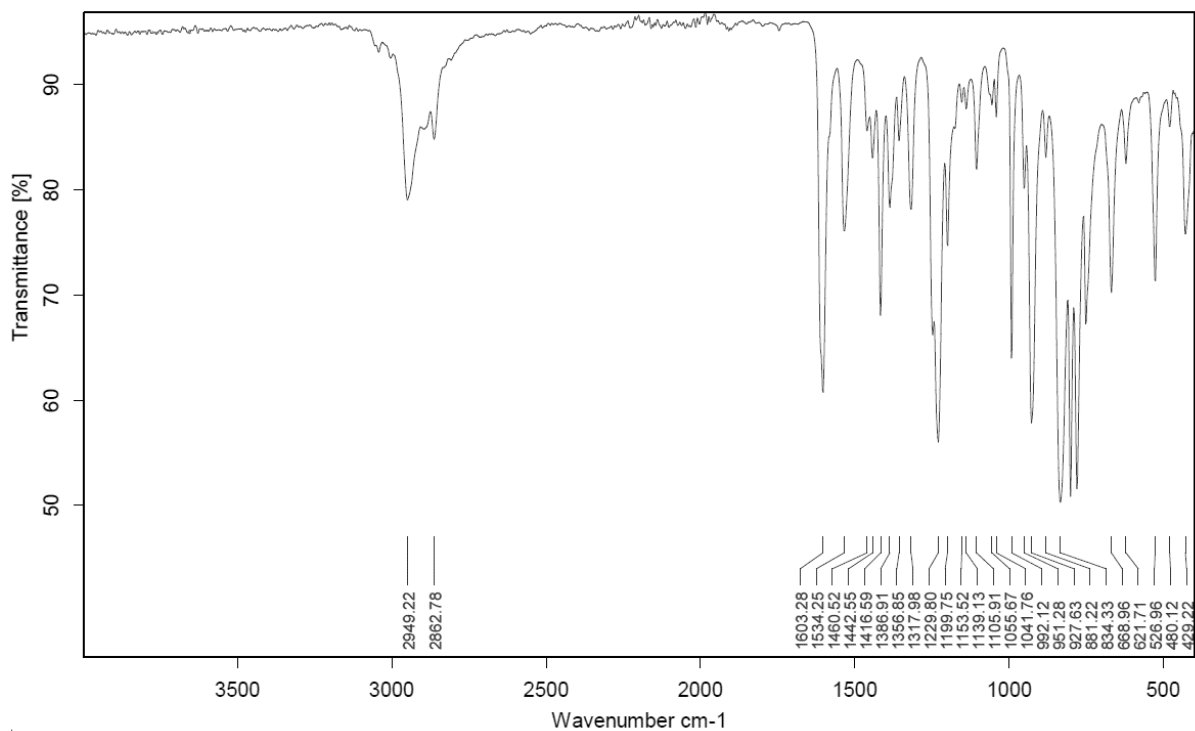

**Figure S 55.** IR spectrum of [K(DMAP)<sub>2</sub>Fe(L<sup>2</sup>)<sub>2</sub>] (3.2DMAP).



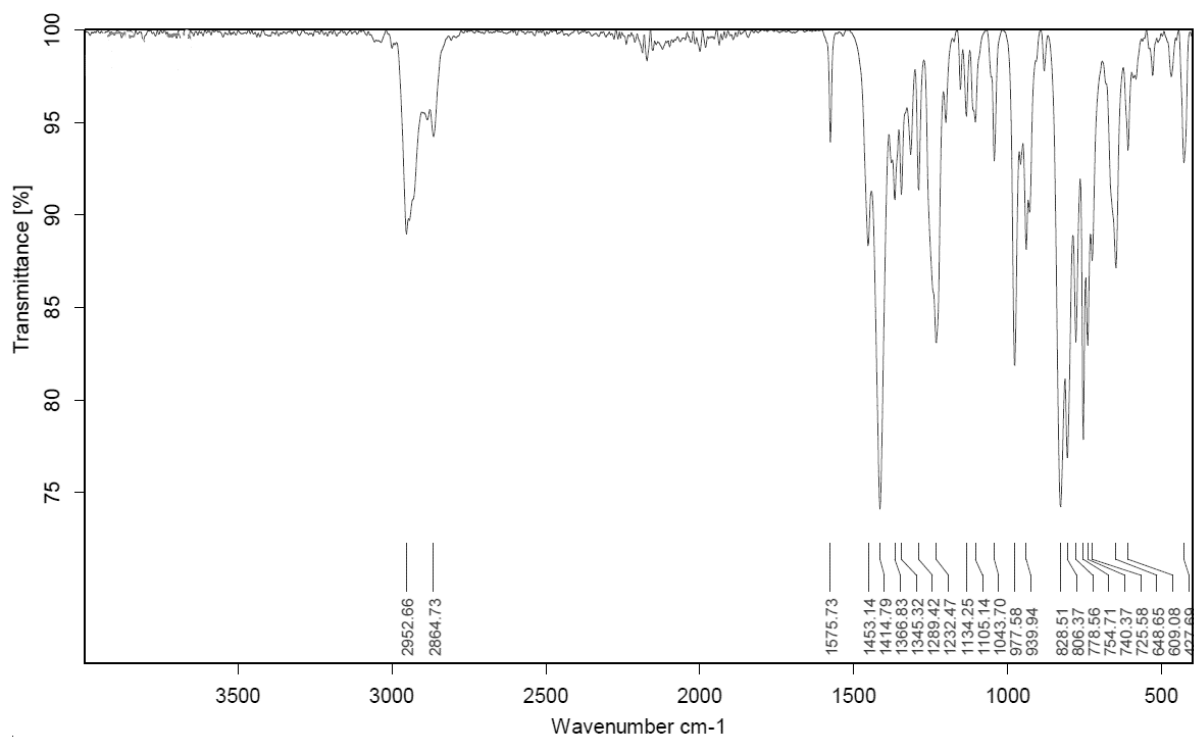

**Figure S 56.** IR spectrum of [KCo(L<sup>2</sup>)<sub>2</sub>] (4).

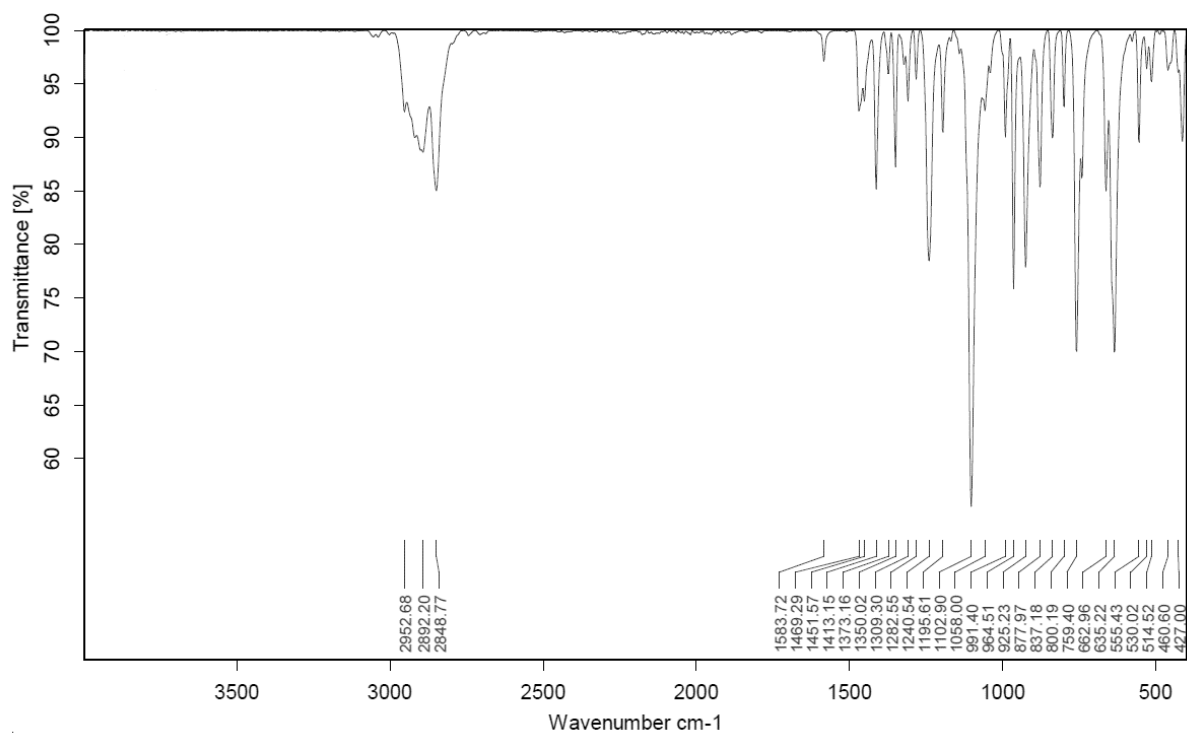

**Figure S 57.** IR spectrum of [K{18c6}(thf)<sub>2</sub>][Cr(L<sup>1</sup>)<sub>2</sub>] (5).

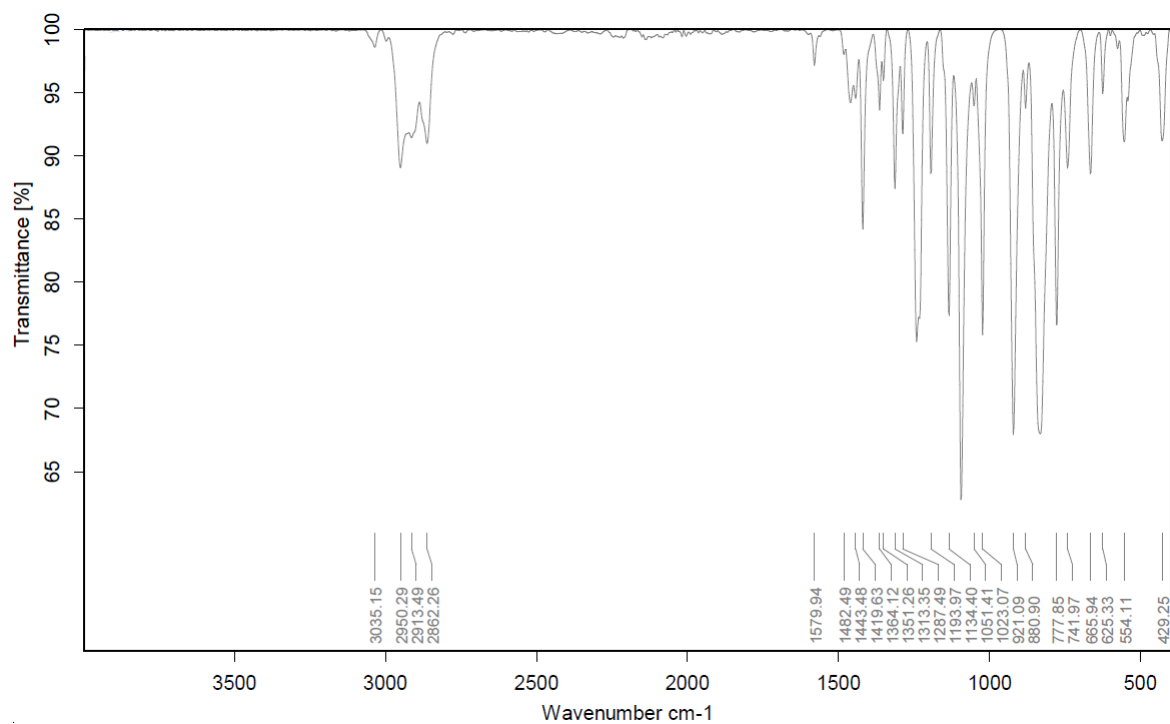

**Figure S 58.** IR spectrum of [Li{12c4}][Fe(L<sup>2</sup>)<sub>2</sub>] (6).

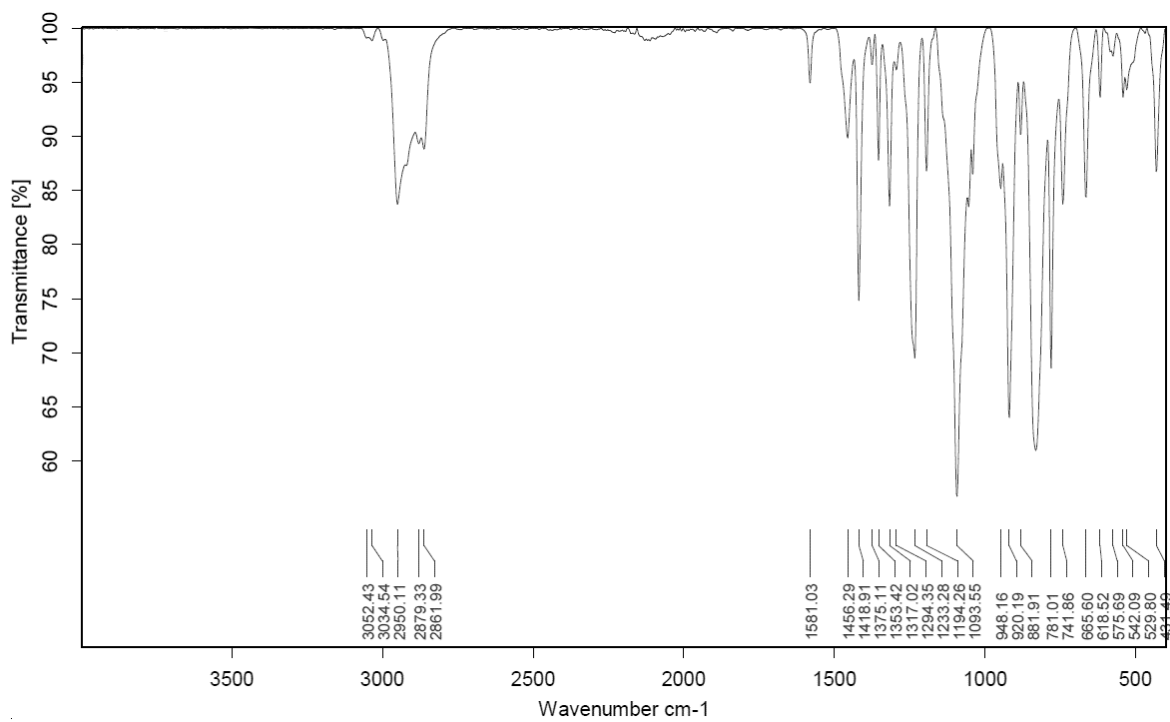

**Figure S 59.** IR spectrum of [Na{18c6}][Fe(L<sup>2</sup>)<sub>2</sub>] (7).

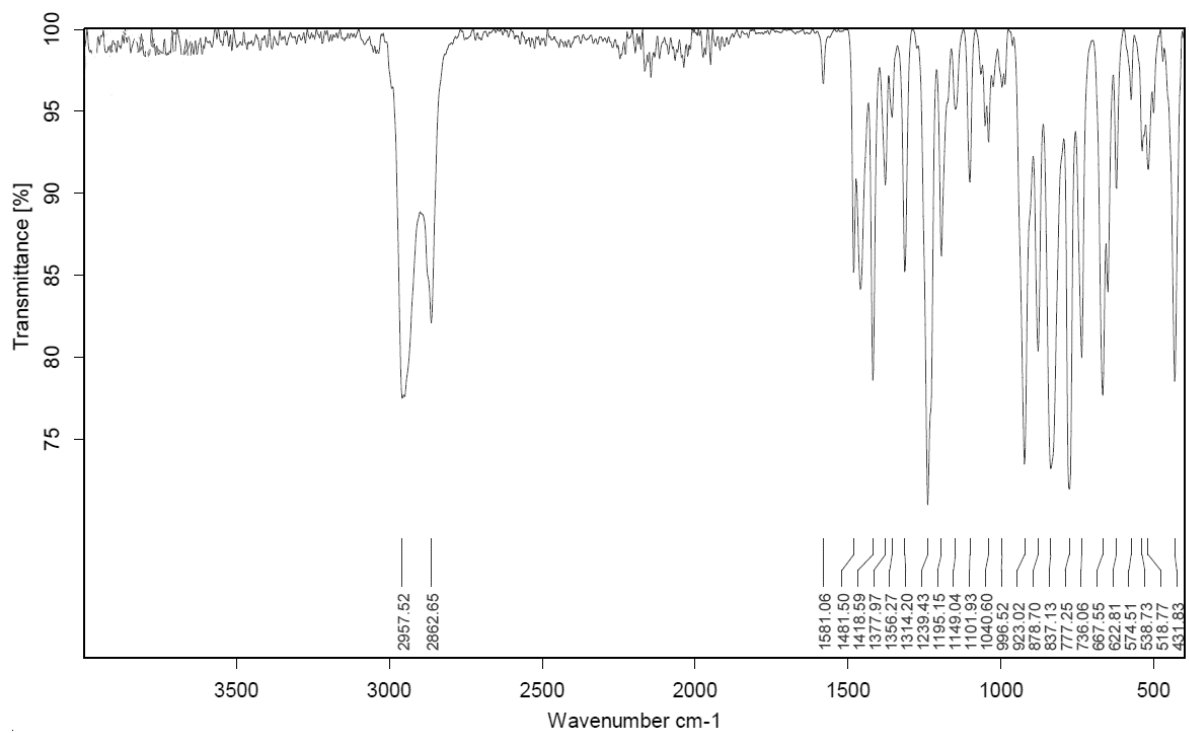

**Figure S 60.** IR spectrum of  $[\text{NBu}_4][\text{Fe}(\text{L}^2)_2]$  (**8**).

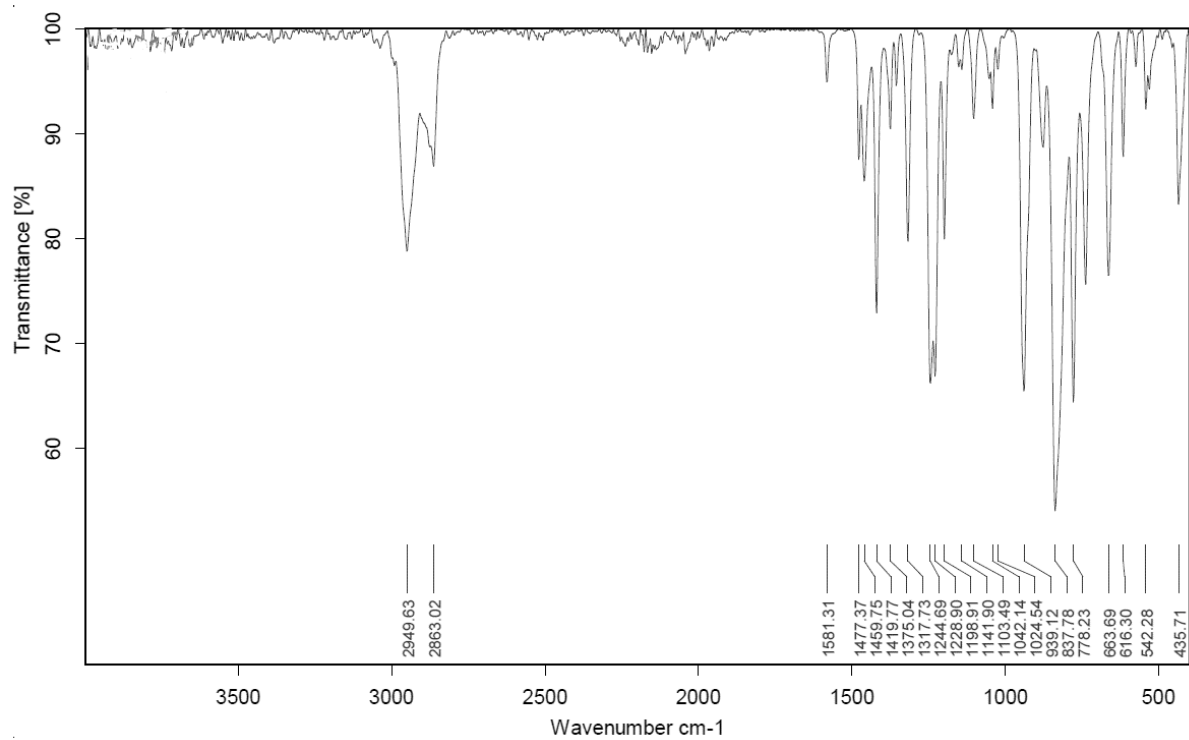

**Figure S 61.** IR spectrum of  $[\text{NBu}_4][\text{Co}(\text{L}^2)_2]$  (**9**).

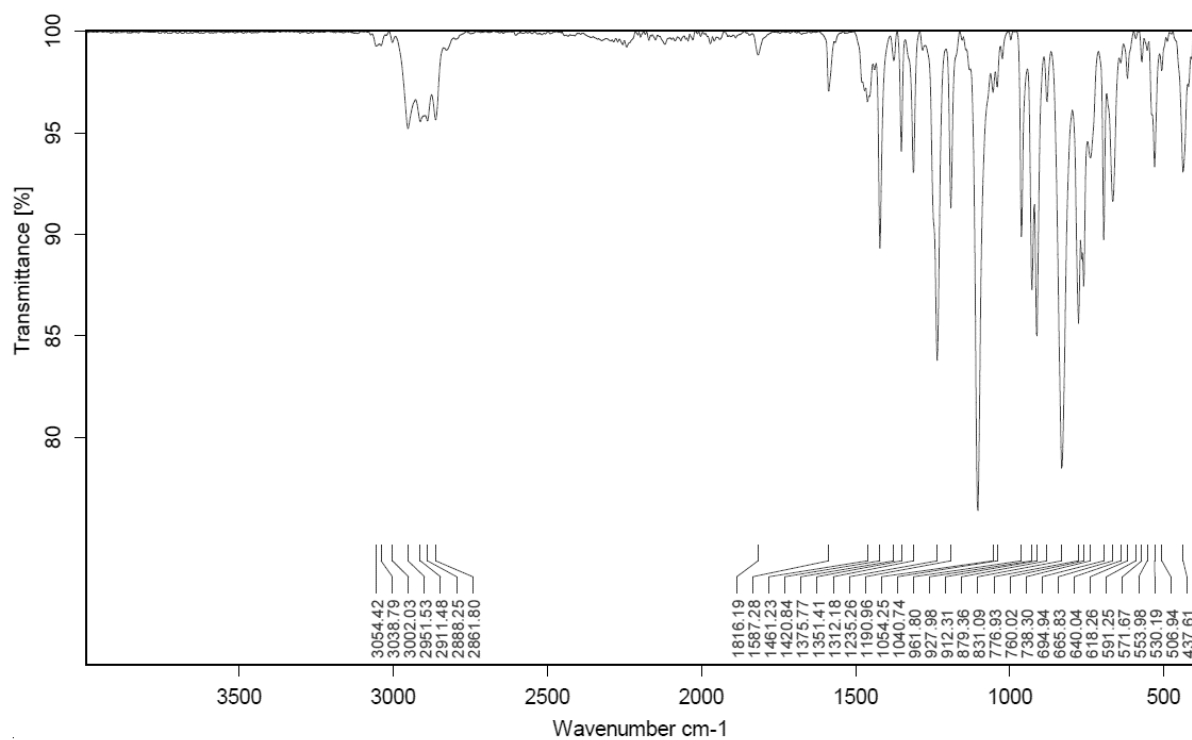

**Figure S 62.** IR spectrum of [K{18c6}][Fe(L<sup>2</sup>)<sub>2</sub>](η<sup>2</sup>-PhCCPh) (10).

## 4 X-Ray Diffraction Analysis and Molecular Structures

### [KCr(L<sup>1</sup>)<sub>2</sub>] (1)

**Table S 2.** Crystal data and structure refinement of **1**

|                                             |                                                                   |
|---------------------------------------------|-------------------------------------------------------------------|
| Empirical formula                           | C <sub>42</sub> H <sub>76</sub> CrKN <sub>2</sub> Si <sub>2</sub> |
| Formula weight                              | 756.32                                                            |
| Temperature/K                               | 99.99                                                             |
| Crystal system                              | orthorhombic                                                      |
| Space group                                 | Pbcn                                                              |
| a/Å                                         | 22.7750(14)                                                       |
| b/Å                                         | 22.3023(13)                                                       |
| c/Å                                         | 17.1996(10)                                                       |
| α/°                                         | 90                                                                |
| β/°                                         | 90                                                                |
| γ/°                                         | 90                                                                |
| Volume/Å <sup>3</sup>                       | 8736.3(9)                                                         |
| Z                                           | 8                                                                 |
| ρ <sub>calc</sub> /cm <sup>3</sup>          | 1.150                                                             |
| μ/mm <sup>-1</sup>                          | 0.441                                                             |
| F(000)                                      | 3304.0                                                            |
| Crystal size/mm <sup>3</sup>                | 0.157 × 0.124 × 0.109                                             |
| Radiation                                   | MoKα (λ = 0.71073)                                                |
| 2θ range for data collection/°              | 4.354 to 49.998                                                   |
| Index ranges                                | -27 ≤ h ≤ 27, -26 ≤ k ≤ 26, -20 ≤ l ≤ 20                          |
| Reflections collected                       | 119181                                                            |
| Independent reflections                     | 7685 [R <sub>int</sub> = 0.1694, R <sub>sigma</sub> = 0.0597]     |
| Data/restraints/parameters                  | 7685/36/453                                                       |
| Goodness-of-fit on F <sup>2</sup>           | 1.043                                                             |
| Final R indexes [I ≥ 2σ (I)]                | R <sub>1</sub> = 0.0562, wR <sub>2</sub> = 0.1031                 |
| Final R indexes [all data]                  | R <sub>1</sub> = 0.0895, wR <sub>2</sub> = 0.1112                 |
| Largest diff. peak/hole / e Å <sup>-3</sup> | 0.35/-0.41                                                        |

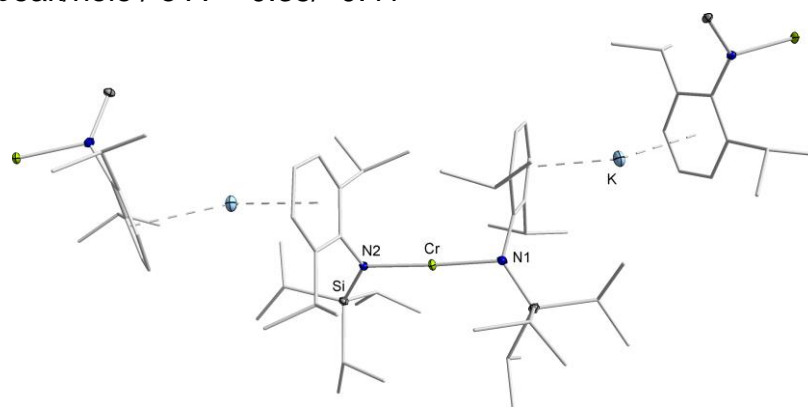

**Figure S 63.** Molecular structure of [KCr<sup>I</sup>(L<sup>1</sup>)<sub>2</sub>]<sub>n</sub> (**1**). All hydrogen atoms are omitted for clarity.

**Table S 3.** Crystal data and structure refinement of 1.3THF

|                                             |                                                                                  |
|---------------------------------------------|----------------------------------------------------------------------------------|
| Empirical formula                           | C <sub>54</sub> H <sub>98</sub> CrKN <sub>2</sub> O <sub>3</sub> Si <sub>2</sub> |
| Formula weight                              | 970.62                                                                           |
| Temperature/K                               | 100.0                                                                            |
| Crystal system                              | triclinic                                                                        |
| Space group                                 | P-1                                                                              |
| a/Å                                         | 11.886(2)                                                                        |
| b/Å                                         | 14.190(2)                                                                        |
| c/Å                                         | 17.464(3)                                                                        |
| α/°                                         | 93.330(5)                                                                        |
| β/°                                         | 95.457(5)                                                                        |
| γ/°                                         | 97.740(5)                                                                        |
| Volume/Å <sup>3</sup>                       | 2898.0(8)                                                                        |
| Z                                           | 2                                                                                |
| ρ <sub>calc</sub> /cm <sup>3</sup>          | 1.112                                                                            |
| μ/mm <sup>-1</sup>                          | 0.350                                                                            |
| F(000)                                      | 1062.0                                                                           |
| Crystal size/mm <sup>3</sup>                | 0.3 × 0.2 × 0.1                                                                  |
| Radiation                                   | MoKα (λ = 0.71073)                                                               |
| 2θ range for data collection/°              | 4.394 to 29.706                                                                  |
| Index ranges                                | -8 ≤ h ≤ 8, -10 ≤ k ≤ 10, -12 ≤ l ≤ 11                                           |
| Reflections collected                       | 23343                                                                            |
| Independent reflections                     | 2232 [R <sub>int</sub> = 0.0445, R <sub>sigma</sub> = 0.0224]                    |
| Data/restraints/parameters                  | 2232/1424/433                                                                    |
| Goodness-of-fit on F <sup>2</sup>           | 1.182                                                                            |
| Final R indexes [I ≥ 2σ (I)]                | R <sub>1</sub> = 0.1311, wR <sub>2</sub> = 0.2766                                |
| Final R indexes [all data]                  | R <sub>1</sub> = 0.1331, wR <sub>2</sub> = 0.2776                                |
| Largest diff. peak/hole / e Å <sup>-3</sup> | 0.69/-0.39                                                                       |

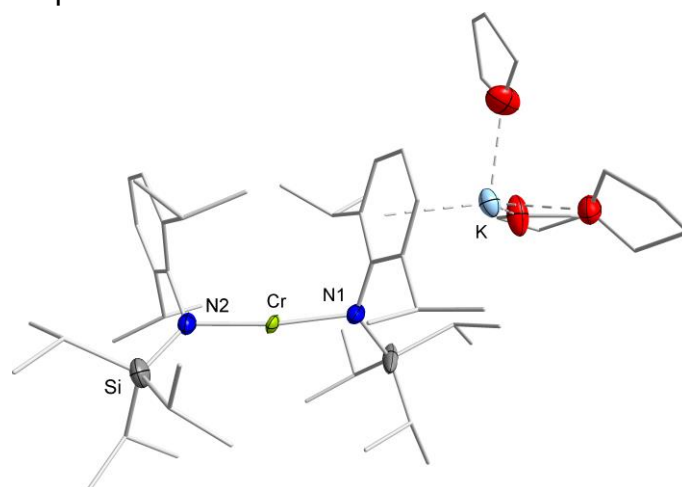**Figure S 64.** Molecular structure of [K(THF)<sub>3</sub>Cr(L<sup>1</sup>)<sub>2</sub>] (1.3THF). All hydrogen atoms are omitted for clarity. Disorders were found for one THF molecule (part 1: 63%, part 2: 37%) and two *iso*-propyl groups of a Si(*i*Pr)<sub>3</sub> unit (part 1/2: 50%).

**[KMn(L<sup>2</sup>)<sub>2</sub>] (2)****Table S 4.** Crystal data and structure refinement of **2**

|                                             |                                                                   |
|---------------------------------------------|-------------------------------------------------------------------|
| Empirical formula                           | C <sub>30</sub> H <sub>52</sub> KMnN <sub>2</sub> Si <sub>2</sub> |
| Formula weight                              | 590.97                                                            |
| Temperature/K                               | 100.01                                                            |
| Crystal system                              | monoclinic                                                        |
| Space group                                 | P2 <sub>1</sub> /n                                                |
| a/Å                                         | 11.6778(6)                                                        |
| b/Å                                         | 17.5423(9)                                                        |
| c/Å                                         | 17.8495(8)                                                        |
| α/°                                         | 90                                                                |
| β/°                                         | 108.652(2)                                                        |
| γ/°                                         | 90                                                                |
| Volume/Å <sup>3</sup>                       | 3464.5(3)                                                         |
| Z                                           | 4                                                                 |
| ρ <sub>calc</sub> /cm <sup>3</sup>          | 1.1329                                                            |
| μ/mm <sup>-1</sup>                          | 0.590                                                             |
| F(000)                                      | 1275.2                                                            |
| Crystal size/mm <sup>3</sup>                | 0.236 × 0.179 × 0.132                                             |
| Radiation                                   | Mo Kα (λ = 0.71073)                                               |
| 2θ range for data collection/°              | 4.36 to 53.36                                                     |
| Index ranges                                | -14 ≤ h ≤ 14, -22 ≤ k ≤ 22, -22 ≤ l ≤ 22                          |
| Reflections collected                       | 76754                                                             |
| Independent reflections                     | 7299 [R <sub>int</sub> = 0.1314, R <sub>sigma</sub> = 0.0575]     |
| Data/restraints/parameters                  | 7299/0/533                                                        |
| Goodness-of-fit on F <sup>2</sup>           | 1.011                                                             |
| Final R indexes [I ≥ 2σ (I)]                | R <sub>1</sub> = 0.0357, wR <sub>2</sub> = 0.0767                 |
| Final R indexes [all data]                  | R <sub>1</sub> = 0.0509, wR <sub>2</sub> = 0.0824                 |
| Largest diff. peak/hole / e Å <sup>-3</sup> | 0.84/-0.51                                                        |

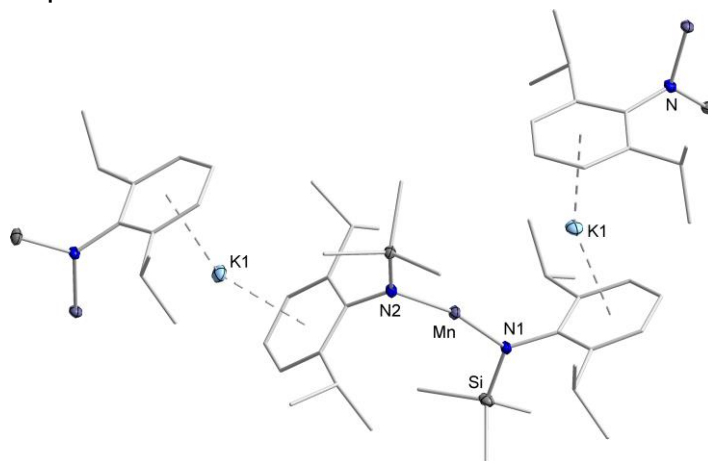**Figure S 65.** Molecular structure of [KMn<sup>I</sup>(L<sup>2</sup>)<sub>2</sub>]<sub>n</sub> (**2**). All hydrogen atoms are omitted for clarity.

**[KFe(L<sup>2</sup>)<sub>2</sub>] (3)****Table S 5.** Crystal data and structure refinement of **3**

|                                             |                                                                   |
|---------------------------------------------|-------------------------------------------------------------------|
| Empirical formula                           | C <sub>30</sub> H <sub>52</sub> FeKN <sub>2</sub> Si <sub>2</sub> |
| Formula weight                              | 591.86                                                            |
| Temperature/K                               | 100.0                                                             |
| Crystal system                              | triclinic                                                         |
| Space group                                 | P-1                                                               |
| a/Å                                         | 11.8776(6)                                                        |
| b/Å                                         | 14.0736(7)                                                        |
| c/Å                                         | 14.4037(7)                                                        |
| α/°                                         | 115.309(2)                                                        |
| β/°                                         | 91.001(2)                                                         |
| γ/°                                         | 110.473(2)                                                        |
| Volume/Å <sup>3</sup>                       | 1999.11(18)                                                       |
| Z                                           | 2                                                                 |
| ρ <sub>calc</sub> /cm <sup>3</sup>          | 0.983                                                             |
| μ/mm <sup>-1</sup>                          | 0.558                                                             |
| F(000)                                      | 638.0                                                             |
| Crystal size/mm <sup>3</sup>                | 0.5 × 0.386 × 0.278                                               |
| Radiation                                   | MoKα (λ = 0.71073)                                                |
| 2θ range for data collection/°              | 3.734 to 52                                                       |
| Index ranges                                | -14 ≤ h ≤ 14, -17 ≤ k ≤ 17, -17 ≤ l ≤ 17                          |
| Reflections collected                       | 72350                                                             |
| Independent reflections                     | 7861 [R <sub>int</sub> = 0.0405, R <sub>sigma</sub> = 0.0193]     |
| Data/restraints/parameters                  | 7861/0/363                                                        |
| Goodness-of-fit on F <sup>2</sup>           | 1.086                                                             |
| Final R indexes [I ≥ 2σ (I)]                | R <sub>1</sub> = 0.0296, wR <sub>2</sub> = 0.0836                 |
| Final R indexes [all data]                  | R <sub>1</sub> = 0.0341, wR <sub>2</sub> = 0.0851                 |
| Largest diff. peak/hole / e Å <sup>-3</sup> | 0.31/-0.26                                                        |

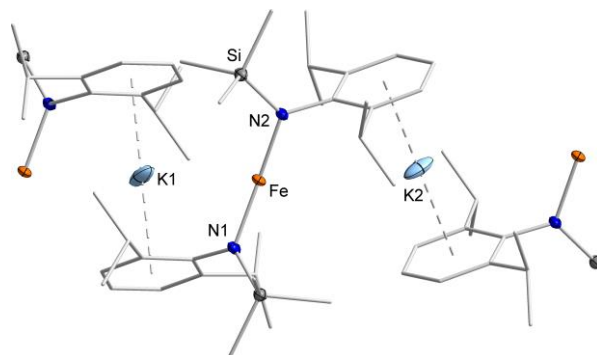

**Figure S 66.** Molecular structure of [KFe(L<sup>2</sup>)<sub>2</sub>]<sub>n</sub> (**3**). All hydrogen atoms are omitted for clarity. Disordering the potassium ion over two positions did not lead to a better, stable structure refinement. one free *n*-pentane molecule is heavily disordered over multiple positions. Attempts to model the disorders did not lead to satisfactory. It was thus squeezed.



**Table S 6.** Crystal data and structure refinement of **3**.Et<sub>2</sub>O

|                                             |                                                                                                              |
|---------------------------------------------|--------------------------------------------------------------------------------------------------------------|
| Empirical formula                           | C <sub>34</sub> H <sub>62</sub> Fe <sub>1</sub> K <sub>1</sub> N <sub>2</sub> O <sub>1</sub> Si <sub>2</sub> |
| Formula weight                              | 666.00                                                                                                       |
| Temperature/K                               | 100                                                                                                          |
| Crystal system                              | monoclinic                                                                                                   |
| Space group                                 | P 1 2 <sub>1</sub> /n 1                                                                                      |
| a/Å                                         | 10.4002(6)                                                                                                   |
| b/Å                                         | 16.5542(9)                                                                                                   |
| c/Å                                         | 22.9563(13)                                                                                                  |
| α/°                                         | 90                                                                                                           |
| β/°                                         | 95.379(2)                                                                                                    |
| γ/°                                         | 90                                                                                                           |
| Volume/Å <sup>3</sup>                       | 3934.9(4)                                                                                                    |
| Z                                           | 4                                                                                                            |
| ρ <sub>calc</sub> /cm <sup>3</sup>          | 1.124                                                                                                        |
| μ/mm <sup>-1</sup>                          | 0.576                                                                                                        |
| F(000)                                      | 1444.000                                                                                                     |
| Crystal size/mm <sup>3</sup>                | 0.15 × 0.15 × 0.15                                                                                           |
| Radiation                                   | MoKα (λ = 0.71073)                                                                                           |
| 2θ range for data collection/°              | 2 to 32                                                                                                      |
| Index ranges                                | -15 ≤ h ≤ 15, 0 ≤ k ≤ 24, 0 ≤ l ≤ 16                                                                         |
| Reflections collected                       | 98693                                                                                                        |
| Independent reflections                     | 8758                                                                                                         |
| Data/restraints/parameters                  | 7182/0/370                                                                                                   |
| Goodness-of-fit on F <sup>2</sup>           | 1.057                                                                                                        |
| Final R indexes [I ≥ 2σ (I)]                | R1 = 0.0299, wR2 = 0.0296                                                                                    |
| Final R indexes [all data]                  | R1 = 0.0405, wR2 = 0.0439                                                                                    |
| Largest diff. peak/hole / e Å <sup>-3</sup> | 0.84/-0.36                                                                                                   |

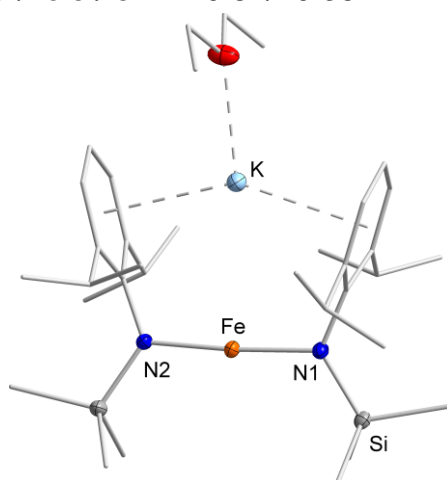**Figure S 67.** Molecular structure of [K(Et<sub>2</sub>O)Fe(L<sup>2</sup>)<sub>2</sub>] (**3**.Et<sub>2</sub>O). All hydrogen atoms are omitted for clarity. Some data are probably incomplete due to strategy errors.

**Table S 7.** Crystal data and structure refinement of **3.2DMAP**

|                                             |                                                                                                  |
|---------------------------------------------|--------------------------------------------------------------------------------------------------|
| Empirical formula                           | C <sub>176</sub> H <sub>288</sub> Fe <sub>4</sub> K <sub>4</sub> N <sub>24</sub> Si <sub>8</sub> |
| Formula weight                              | 3344.81                                                                                          |
| Temperature/K                               | 100                                                                                              |
| Crystal system                              | monoclinic                                                                                       |
| Space group                                 | C2/c                                                                                             |
| a/Å                                         | 20.857(3)                                                                                        |
| b/Å                                         | 13.086(2)                                                                                        |
| c/Å                                         | 19.863(3)                                                                                        |
| α/°                                         | 90                                                                                               |
| β/°                                         | 117.192(10)                                                                                      |
| γ/°                                         | 90                                                                                               |
| Volume/Å <sup>3</sup>                       | 4822.1(14)                                                                                       |
| Z                                           | 1                                                                                                |
| ρ <sub>calc</sub> /cm <sup>3</sup>          | 1.152                                                                                            |
| μ/mm <sup>-1</sup>                          | 0.483                                                                                            |
| F(000)                                      | 1804.0                                                                                           |
| Crystal size/mm <sup>3</sup>                | 0.687 × 0.104 × 0.098                                                                            |
| Radiation                                   | MoKα (λ = 0.71073)                                                                               |
| 2θ range for data collection/°              | 3.808 to 50                                                                                      |
| Index ranges                                | -24 ≤ h ≤ 21, -15 ≤ k ≤ 15, -23 ≤ l ≤ 23                                                         |
| Reflections collected                       | 18133                                                                                            |
| Independent reflections                     | 4259 [R <sub>int</sub> = 0.0940, R <sub>sigma</sub> = 0.0594]                                    |
| Data/restraints/parameters                  | 4259/0/254                                                                                       |
| Goodness-of-fit on F <sup>2</sup>           | 0.938                                                                                            |
| Final R indexes [I ≥ 2σ (I)]                | R <sub>1</sub> = 0.0634, wR <sub>2</sub> = 0.1572                                                |
| Final R indexes [all data]                  | R <sub>1</sub> = 0.0848, wR <sub>2</sub> = 0.1679                                                |
| Largest diff. peak/hole / e Å <sup>-3</sup> | 0.54/-0.78                                                                                       |

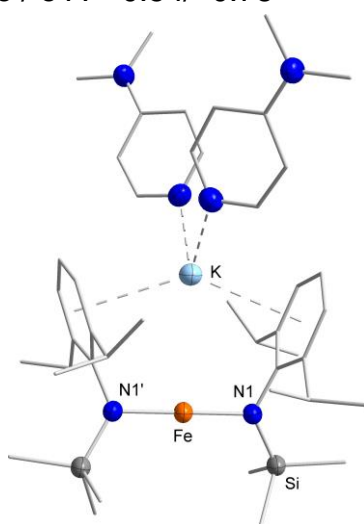**Figure S 68.** Molecular structure of [K(DMAP)<sub>2</sub>Fe(L<sup>2</sup>)<sub>2</sub>] (**3.2DMAP**). All hydrogen atoms are omitted for clarity.

**[K(C<sub>7</sub>H<sub>8</sub>)Co(L<sup>2</sup>)<sub>2</sub>] (4)****Table S 8.** Crystal data and structure refinement of **4**

|                                             |                                                                   |
|---------------------------------------------|-------------------------------------------------------------------|
| Empirical formula                           | C <sub>37</sub> H <sub>60</sub> CoKN <sub>2</sub> Si <sub>2</sub> |
| Formula weight                              | 687.08                                                            |
| Temperature/K                               | 100.0                                                             |
| Crystal system                              | monoclinic                                                        |
| Space group                                 | C2/c                                                              |
| a/Å                                         | 24.6815(11)                                                       |
| b/Å                                         | 25.6246(11)                                                       |
| c/Å                                         | 15.9053(7)                                                        |
| α/°                                         | 90                                                                |
| β/°                                         | 128.3810(10)                                                      |
| γ/°                                         | 90                                                                |
| Volume/Å <sup>3</sup>                       | 7885.5(6)                                                         |
| Z                                           | 8                                                                 |
| ρ <sub>calc</sub> /cm <sup>3</sup>          | 1.157                                                             |
| μ/mm <sup>-1</sup>                          | 0.627                                                             |
| F(000)                                      | 2960.0                                                            |
| Crystal size/mm <sup>3</sup>                | 0.567 × 0.191 × 0.143                                             |
| Radiation                                   | MoKα (λ = 0.71073)                                                |
| 2θ range for data collection/°              | 4.558 to 52.212                                                   |
| Index ranges                                | -30 ≤ h ≤ 30, -31 ≤ k ≤ 31, -17 ≤ l ≤ 19                          |
| Reflections collected                       | 141451                                                            |
| Independent reflections                     | 7826 [R <sub>int</sub> = 0.0701, R <sub>sigma</sub> = 0.0234]     |
| Data/restraints/parameters                  | 7826/0/414                                                        |
| Goodness-of-fit on F <sup>2</sup>           | 1.211                                                             |
| Final R indexes [I ≥ 2σ (I)]                | R <sub>1</sub> = 0.0399, wR <sub>2</sub> = 0.0788                 |
| Final R indexes [all data]                  | R <sub>1</sub> = 0.0508, wR <sub>2</sub> = 0.0817                 |
| Largest diff. peak/hole / e Å <sup>-3</sup> | 0.28/-0.31                                                        |

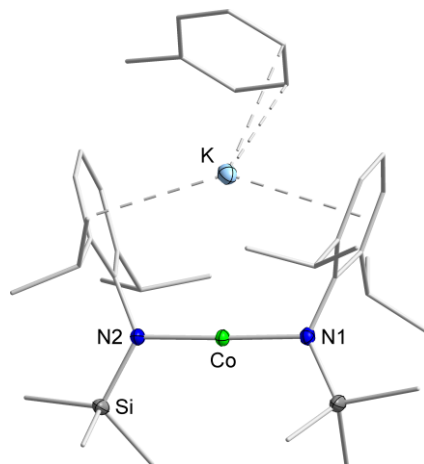**Figure S 69.** Molecular structure of [K(C<sub>7</sub>H<sub>8</sub>)Co(L<sup>2</sup>)<sub>2</sub>] (**4**). All hydrogen atoms are omitted for clarity.

## [K{18c6}(THF)<sub>2</sub>][Cr(L<sup>1</sup>)<sub>2</sub>] (5)

**Table S 9.** Crystal data and structure refinement of **5**

|                                             |                                                                                   |
|---------------------------------------------|-----------------------------------------------------------------------------------|
| Empirical formula                           | C <sub>62</sub> H <sub>116</sub> CrKN <sub>2</sub> O <sub>8</sub> Si <sub>2</sub> |
| Formula weight                              | 1164.82                                                                           |
| Temperature/K                               | 100.0                                                                             |
| Crystal system                              | orthorhombic                                                                      |
| Space group                                 | Pbca                                                                              |
| a/Å                                         | 17.2978(7)                                                                        |
| b/Å                                         | 23.0874(9)                                                                        |
| c/Å                                         | 34.2506(14)                                                                       |
| α/°                                         | 90                                                                                |
| β/°                                         | 90                                                                                |
| γ/°                                         | 90                                                                                |
| Volume/Å <sup>3</sup>                       | 13678.4(10)                                                                       |
| Z                                           | 8                                                                                 |
| ρ <sub>calc</sub> /cm <sup>3</sup>          | 1.131                                                                             |
| μ/mm <sup>-1</sup>                          | 0.312                                                                             |
| F(000)                                      | 5096.0                                                                            |
| Crystal size/mm <sup>3</sup>                | 0.338 × 0.243 × 0.16                                                              |
| Radiation                                   | MoKα (λ = 0.71073)                                                                |
| 2θ range for data collection/°              | 4.256 to 52.23                                                                    |
| Index ranges                                | -21 ≤ h ≤ 21, -28 ≤ k ≤ 28, -41 ≤ l ≤ 42                                          |
| Reflections collected                       | 239756                                                                            |
| Independent reflections                     | 13578 [R <sub>int</sub> = 0.0914, R <sub>sigma</sub> = 0.0297]                    |
| Data/restraints/parameters                  | 13578/2/722                                                                       |
| Goodness-of-fit on F <sup>2</sup>           | 1.054                                                                             |
| Final R indexes [I ≥ 2σ (I)]                | R <sub>1</sub> = 0.0364, wR <sub>2</sub> = 0.0724                                 |
| Final R indexes [all data]                  | R <sub>1</sub> = 0.0544, wR <sub>2</sub> = 0.0782                                 |
| Largest diff. peak/hole / e Å <sup>-3</sup> | 0.28/-0.24                                                                        |

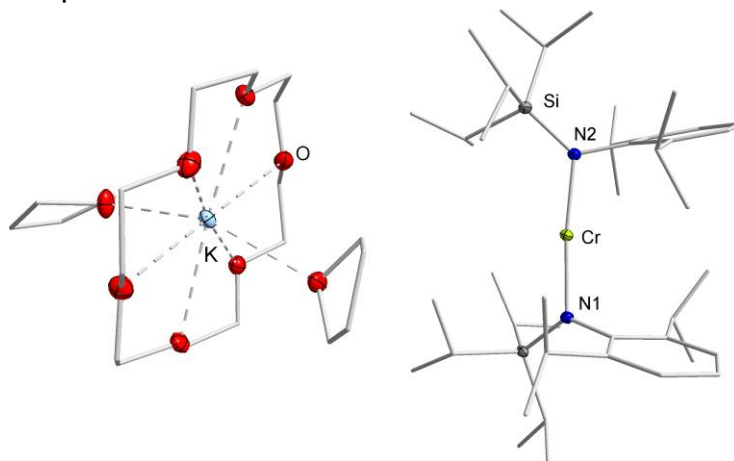

**Figure S 70.** Molecular structure of [K{18c6}(THF)<sub>2</sub>][Cr(L<sup>1</sup>)<sub>2</sub>] (**5**). All hydrogen atoms and a disorder in one THF molecule are omitted for clarity.

**[Li{12c4}<sub>2</sub>][Fe(L<sup>2</sup>)<sub>2</sub>] (6)****Table S 10.** Crystal data and structure refinement of **6**

|                                             |                                                                                   |
|---------------------------------------------|-----------------------------------------------------------------------------------|
| Empirical formula                           | C <sub>46</sub> H <sub>84</sub> FeLiN <sub>2</sub> O <sub>8</sub> Si <sub>2</sub> |
| Formula weight                              | 912.12                                                                            |
| Temperature/K                               | 100.0                                                                             |
| Crystal system                              | triclinic                                                                         |
| Space group                                 | P-1                                                                               |
| a/Å                                         | 11.6888(8)                                                                        |
| b/Å                                         | 14.5127(10)                                                                       |
| c/Å                                         | 16.4126(12)                                                                       |
| α/°                                         | 70.550(2)                                                                         |
| β/°                                         | 83.481(2)                                                                         |
| γ/°                                         | 77.315(2)                                                                         |
| Volume/Å <sup>3</sup>                       | 2558.7(3)                                                                         |
| Z                                           | 2                                                                                 |
| ρ <sub>calc</sub> /cm <sup>3</sup>          | 1.184                                                                             |
| μ/mm <sup>-1</sup>                          | 0.390                                                                             |
| F(000)                                      | 990.0                                                                             |
| Crystal size/mm <sup>3</sup>                | 0.395 × 0.248 × 0.242                                                             |
| Radiation                                   | MoKα (λ = 0.71073)                                                                |
| 2θ range for data collection/°              | 4.346 to 61.008                                                                   |
| Index ranges                                | -14 ≤ h ≤ 16, -20 ≤ k ≤ 20, -23 ≤ l ≤ 23                                          |
| Reflections collected                       | 50692                                                                             |
| Independent reflections                     | 14042 [R <sub>int</sub> = 0.0418, R <sub>sigma</sub> = 0.0499]                    |
| Data/restraints/parameters                  | 14042/471/564                                                                     |
| Goodness-of-fit on F <sup>2</sup>           | 1.098                                                                             |
| Final R indexes [I ≥ 2σ (I)]                | R <sub>1</sub> = 0.0826, wR <sub>2</sub> = 0.1912                                 |
| Final R indexes [all data]                  | R <sub>1</sub> = 0.0979, wR <sub>2</sub> = 0.1996                                 |
| Largest diff. peak/hole / e Å <sup>-3</sup> | 1.46/-0.85                                                                        |

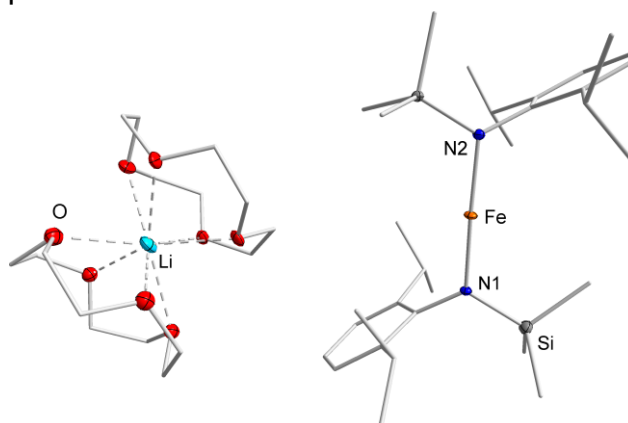**Figure S 71.** Molecular structure of [Li{12c4}<sub>2</sub>][Fe(L<sup>2</sup>)<sub>2</sub>] (**6**). All hydrogen atoms are omitted for clarity. The structure was refined as a twin, twin ratio refined to 0.0863(9).

**[Na{18c6}(Et<sub>2</sub>O)][Fe(L<sup>2</sup>)<sub>2</sub>] (7)****Table S 11.** Crystal data and structure refinement of **7**

|                                             |                                                                                   |
|---------------------------------------------|-----------------------------------------------------------------------------------|
| Empirical formula                           | C <sub>46</sub> H <sub>86</sub> FeN <sub>2</sub> NaO <sub>7</sub> Si <sub>2</sub> |
| Formula weight                              | 914.18                                                                            |
| Temperature/K                               | 100.0                                                                             |
| Crystal system                              | triclinic                                                                         |
| Space group                                 | P-1                                                                               |
| a/Å                                         | 12.392(3)                                                                         |
| b/Å                                         | 13.002(3)                                                                         |
| c/Å                                         | 18.053(3)                                                                         |
| α/°                                         | 71.086(15)                                                                        |
| β/°                                         | 76.889(16)                                                                        |
| γ/°                                         | 70.636(15)                                                                        |
| Volume/Å <sup>3</sup>                       | 2572.7(10)                                                                        |
| Z                                           | 2                                                                                 |
| ρ <sub>calc</sub> /cm <sup>3</sup>          | 1.180                                                                             |
| μ/mm <sup>-1</sup>                          | 0.395                                                                             |
| F(000)                                      | 994.0                                                                             |
| Crystal size/mm <sup>3</sup>                | 0.893 × 0.503 × 0.2                                                               |
| Radiation                                   | MoKα (λ = 0.71073)                                                                |
| 2θ range for data collection/°              | 3.45 to 53.888                                                                    |
| Index ranges                                | -15 ≤ h ≤ 14, -16 ≤ k ≤ 16, -23 ≤ l ≤ 22                                          |
| Reflections collected                       | 23621                                                                             |
| Independent reflections                     | 10961 [R <sub>int</sub> = 0.2177, R <sub>sigma</sub> = 0.1943]                    |
| Data/restraints/parameters                  | 10961/54/578                                                                      |
| Goodness-of-fit on F <sup>2</sup>           | 0.909                                                                             |
| Final R indexes [I ≥ 2σ (I)]                | R <sub>1</sub> = 0.0828, wR <sub>2</sub> = 0.2018                                 |
| Final R indexes [all data]                  | R <sub>1</sub> = 0.1415, wR <sub>2</sub> = 0.2306                                 |
| Largest diff. peak/hole / e Å <sup>-3</sup> | 1.03/-0.86                                                                        |

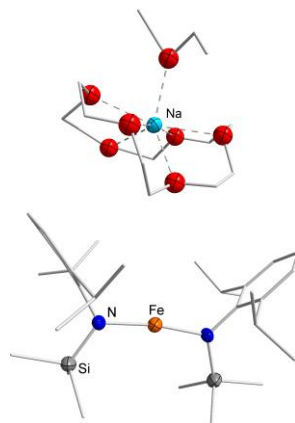**Figure S 72.** Molecular structure of [Na{18c6}(Et<sub>2</sub>O)][Fe(L<sup>2</sup>)<sub>2</sub>] (**7**). All hydrogen atoms are omitted for clarity. A disorder of the 18-crown-6 unit with occupations of 50% for both part 1 (depicted) and part 2 is found.

**[NBu<sub>4</sub>][Fe(L<sup>2</sup>)<sub>2</sub>] (8)****Table S 12.** Crystal data and structure refinement of **8**

|                                             |                                                                                   |
|---------------------------------------------|-----------------------------------------------------------------------------------|
| Empirical formula                           | C <sub>184</sub> H <sub>352</sub> Fe <sub>4</sub> N <sub>12</sub> Si <sub>8</sub> |
| Formula weight                              | 3180.87                                                                           |
| Temperature/K                               | 100                                                                               |
| Crystal system                              | monoclinic                                                                        |
| Space group                                 | P2 <sub>1</sub> /n                                                                |
| a/Å                                         | 18.298(2)                                                                         |
| b/Å                                         | 13.8270(10)                                                                       |
| c/Å                                         | 21.446(3)                                                                         |
| α/°                                         | 90                                                                                |
| β/°                                         | 114.323(10)                                                                       |
| γ/°                                         | 90                                                                                |
| Volume/Å <sup>3</sup>                       | 4944.3(10)                                                                        |
| Z                                           | 1                                                                                 |
| ρ <sub>calc</sub> /cm <sup>3</sup>          | 1.068                                                                             |
| μ/mm <sup>-1</sup>                          | 0.385                                                                             |
| F(000)                                      | 1756.0                                                                            |
| Crystal size/mm <sup>3</sup>                | 0.372 × 0.246 × 0.173                                                             |
| Radiation                                   | MoKα (λ = 0.71073)                                                                |
| 2θ range for data collection/°              | 4.862 to 53.478                                                                   |
| Index ranges                                | -23 ≤ h ≤ 23, -17 ≤ k ≤ 17, -26 ≤ l ≤ 27                                          |
| Reflections collected                       | 44120                                                                             |
| Independent reflections                     | 10436 [R <sub>int</sub> = 0.0915, R <sub>sigma</sub> = 0.0680]                    |
| Data/restraints/parameters                  | 10436/0/487                                                                       |
| Goodness-of-fit on F <sup>2</sup>           | 0.994                                                                             |
| Final R indexes [I ≥ 2σ (I)]                | R <sub>1</sub> = 0.0394, wR <sub>2</sub> = 0.0746                                 |
| Final R indexes [all data]                  | R <sub>1</sub> = 0.0793, wR <sub>2</sub> = 0.0839                                 |
| Largest diff. peak/hole / e Å <sup>-3</sup> | 0.24/-0.35                                                                        |

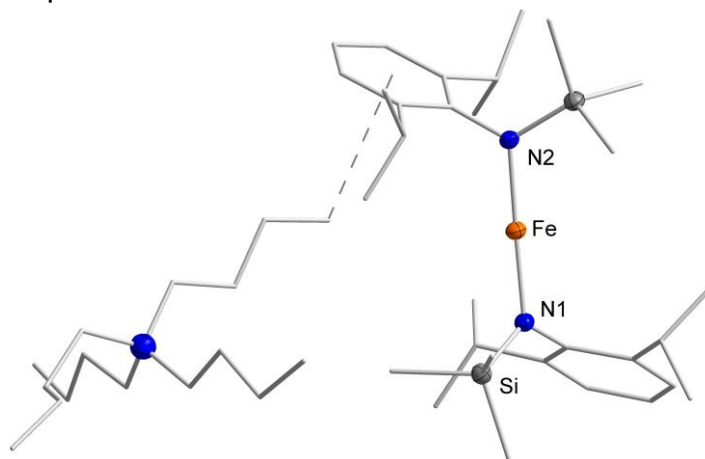**Figure S 73.** Molecular structure of [NBu<sub>4</sub>][Fe(L<sup>2</sup>)<sub>2</sub>] (**8**). All hydrogen atoms are omitted for clarity.

**[NBu<sub>4</sub>][Co(L<sup>2</sup>)<sub>2</sub>] (9)****Table S 13.** Crystal data and structure refinement of **9**

|                                             |                                                                                   |
|---------------------------------------------|-----------------------------------------------------------------------------------|
| Empirical formula                           | C <sub>184</sub> H <sub>352</sub> Co <sub>4</sub> N <sub>12</sub> Si <sub>8</sub> |
| Formula weight                              | 3193.20                                                                           |
| Temperature/K                               | 100                                                                               |
| Crystal system                              | orthorhombic                                                                      |
| Space group                                 | P2 <sub>1</sub> 2 <sub>1</sub> 2 <sub>1</sub>                                     |
| a/Å                                         | 10.7553(6)                                                                        |
| b/Å                                         | 19.9389(8)                                                                        |
| c/Å                                         | 22.5989(11)                                                                       |
| α/°                                         | 90                                                                                |
| β/°                                         | 90                                                                                |
| γ/°                                         | 90                                                                                |
| Volume/Å <sup>3</sup>                       | 4846.3(4)                                                                         |
| Z                                           | 1                                                                                 |
| ρ <sub>calc</sub> /cm <sup>3</sup>          | 1.094                                                                             |
| μ/mm <sup>-1</sup>                          | 0.435                                                                             |
| F(000)                                      | 1760.0                                                                            |
| Crystal size/mm <sup>3</sup>                | 0.432 × 0.293 × 0.185                                                             |
| Radiation                                   | MoKα (λ = 0.71073)                                                                |
| 2θ range for data collection/°              | 3.604 to 49.998                                                                   |
| Index ranges                                | -12 ≤ h ≤ 12, -23 ≤ k ≤ 23, -26 ≤ l ≤ 26                                          |
| Reflections collected                       | 36221                                                                             |
| Independent reflections                     | 8508 [R <sub>int</sub> = 0.0503, R <sub>sigma</sub> = 0.0302]                     |
| Data/restraints/parameters                  | 8508/0/488                                                                        |
| Goodness-of-fit on F <sup>2</sup>           | 1.040                                                                             |
| Final R indexes [I ≥ 2σ (I)]                | R <sub>1</sub> = 0.0286, wR <sub>2</sub> = 0.0720                                 |
| Final R indexes [all data]                  | R <sub>1</sub> = 0.0317, wR <sub>2</sub> = 0.0731                                 |
| Largest diff. peak/hole / e Å <sup>-3</sup> | 0.25/-0.20                                                                        |
| Flack parameter                             | 0.152(12)                                                                         |

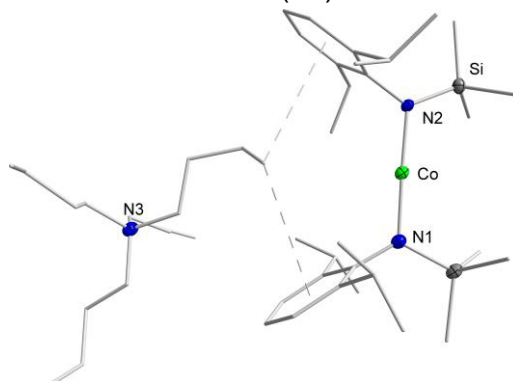**Figure S 74.** Molecular structure of [NBu<sub>4</sub>][Co(L<sup>2</sup>)<sub>2</sub>] (**9**). All hydrogen atoms are omitted for clarity. The structure was refined as an inversion twin, twin ratio refined to 0.152(12).



**[K{18c6}(THF)<sub>2</sub>][Fe(L<sup>2</sup>)<sub>2</sub>](η<sup>2</sup>-PhCCPh) (10)**

**Table S 17.** Crystal data and structure refinement of **10**

|                                             |                                                                                    |
|---------------------------------------------|------------------------------------------------------------------------------------|
| Empirical formula                           | C <sub>64</sub> H <sub>102</sub> N <sub>2</sub> O <sub>8</sub> Si <sub>2</sub> KFe |
| Formula weight                              | 1178.60                                                                            |
| Temperature/K                               | 100.0                                                                              |
| Crystal system                              | triclinic                                                                          |
| Space group                                 | P-1                                                                                |
| a/Å                                         | 11.0677(6)                                                                         |
| b/Å                                         | 13.4596(7)                                                                         |
| c/Å                                         | 22.1320(11)                                                                        |
| α/°                                         | 83.532(2)                                                                          |
| β/°                                         | 88.471(2)                                                                          |
| γ/°                                         | 87.653(2)                                                                          |
| Volume/Å <sup>3</sup>                       | 3272.4(3)                                                                          |
| Z                                           | 2                                                                                  |
| ρ <sub>calc</sub> /cm <sup>3</sup>          | 1.196                                                                              |
| μ/mm <sup>-1</sup>                          | 0.383                                                                              |
| F(000)                                      | 1274.0                                                                             |
| Crystal size/mm <sup>3</sup>                | 0.312 × 0.239 × 0.072                                                              |
| Radiation                                   | MoKα (λ = 0.71073)                                                                 |
| 2θ range for data collection/°              | 4.528 to 50.626                                                                    |
| Index ranges                                | -12 ≤ h ≤ 13, -16 ≤ k ≤ 16, -26 ≤ l ≤ 26                                           |
| Reflections collected                       | 117177                                                                             |
| Independent reflections                     | 11928 [R <sub>int</sub> = 0.0554, R <sub>sigma</sub> = 0.0299]                     |
| Data/restraints/parameters                  | 11928/0/720                                                                        |
| Goodness-of-fit on F <sup>2</sup>           | 1.043                                                                              |
| Final R indexes [I ≥ 2σ (I)]                | R <sub>1</sub> = 0.0367, wR <sub>2</sub> = 0.0731                                  |
| Final R indexes [all data]                  | R <sub>1</sub> = 0.0508, wR <sub>2</sub> = 0.0773                                  |
| Largest diff. peak/hole / e Å <sup>-3</sup> | 0.36/-0.33                                                                         |

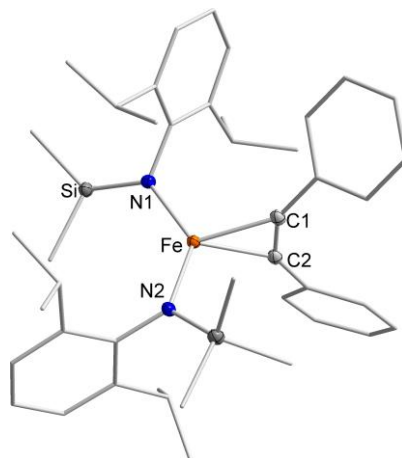

**Figure S 75.** Molecular structure of [K{18c6}(THF)<sub>2</sub>][Fe(L<sup>2</sup>)<sub>2</sub>](η<sup>2</sup>-PhCCPh) (**10**). All hydrogen atoms and the K{18c6}(THF)<sub>2</sub> cation are omitted for clarity.

**[K(Et<sub>2</sub>O)Fe(η<sup>6</sup>-HPB)(η<sup>2</sup>-PhCCPh)] (11.Et<sub>2</sub>O)**

**Table S 15.** Crystal data and structure refinement of **11.Et<sub>2</sub>O**

|                                             |                                                               |
|---------------------------------------------|---------------------------------------------------------------|
| Empirical formula                           | C <sub>60</sub> H <sub>50</sub> FeKO                          |
| Formula weight                              | 881.95                                                        |
| Temperature/K                               | 110.0                                                         |
| Crystal system                              | monoclinic                                                    |
| Space group                                 | P2 <sub>1</sub> /n                                            |
| a/Å                                         | 19.3467(7)                                                    |
| b/Å                                         | 11.2945(4)                                                    |
| c/Å                                         | 21.4705(9)                                                    |
| α/°                                         | 90                                                            |
| β/°                                         | 102.4730(13)                                                  |
| γ/°                                         | 90                                                            |
| Volume/Å <sup>3</sup>                       | 4580.8(3)                                                     |
| Z                                           | 4                                                             |
| ρ <sub>calc</sub> /cm <sup>3</sup>          | 1.279                                                         |
| μ/mm <sup>-1</sup>                          | 0.462                                                         |
| F(000)                                      | 1852.0                                                        |
| Crystal size/mm <sup>3</sup>                | 0.26 × 0.08 × 0.07                                            |
| Radiation                                   | MoKα (λ = 0.71073)                                            |
| 2θ range for data collection/°              | 4.312 to 50.652                                               |
| Index ranges                                | -23 ≤ h ≤ 23, -13 ≤ k ≤ 13, -25 ≤ l ≤ 25                      |
| Reflections collected                       | 115901                                                        |
| Independent reflections                     | 8348 [R <sub>int</sub> = 0.0574, R <sub>sigma</sub> = 0.0218] |
| Data/restraints/parameters                  | 8348/0/594                                                    |
| Goodness-of-fit on F <sup>2</sup>           | 1.029                                                         |
| Final R indexes [I ≥ 2σ (I)]                | R <sub>1</sub> = 0.0368, wR <sub>2</sub> = 0.0870             |
| Final R indexes [all data]                  | R <sub>1</sub> = 0.0470, wR <sub>2</sub> = 0.0920             |
| Largest diff. peak/hole / e Å <sup>-3</sup> | 0.59/-0.50                                                    |

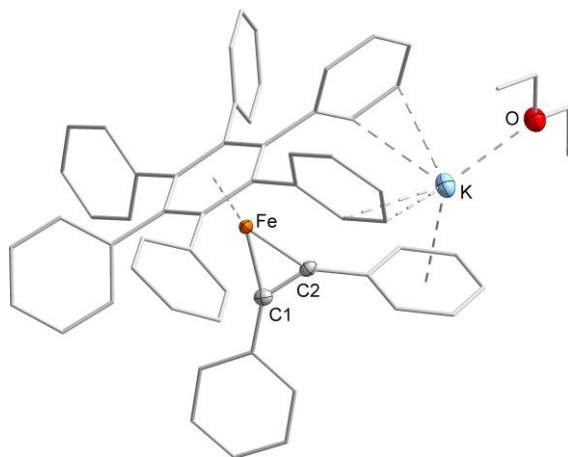

**Figure S 76.** Molecular structure of [K(Et<sub>2</sub>O)Fe(η<sup>6</sup>-HPB)(η<sup>2</sup>-PhCCPh)] (**11.Et<sub>2</sub>O**). All hydrogen atoms are omitted for clarity.

**[KFe( $\eta^6$ -HPB)( $\eta^2$ -PhCCPh)] (11)****Table S 16.** Crystal data and structure refinement of **11**

|                                             |                                                               |
|---------------------------------------------|---------------------------------------------------------------|
| Empirical formula                           | C <sub>56</sub> H <sub>40</sub> FeK                           |
| Formula weight                              | 807.83                                                        |
| Temperature/K                               | 99.99                                                         |
| Crystal system                              | monoclinic                                                    |
| Space group                                 | P2 <sub>1</sub> /c                                            |
| a/Å                                         | 10.4506(4)                                                    |
| b/Å                                         | 18.1974(7)                                                    |
| c/Å                                         | 23.8299(9)                                                    |
| $\alpha$ /°                                 | 90                                                            |
| $\beta$ /°                                  | 97.1120(10)                                                   |
| $\gamma$ /°                                 | 90                                                            |
| Volume/Å <sup>3</sup>                       | 4497.0(3)                                                     |
| Z                                           | 4                                                             |
| $\rho_{\text{calc}}$ /cm <sup>3</sup>       | 1.193                                                         |
| $\mu$ /mm <sup>-1</sup>                     | 0.463                                                         |
| F(000)                                      | 1684.0                                                        |
| Crystal size/mm <sup>3</sup>                | 0.194 × 0.135 × 0.075                                         |
| Radiation                                   | MoK $\alpha$ ( $\lambda$ = 0.71073)                           |
| 2 $\theta$ range for data collection/°      | 4.476 to 52.172                                               |
| Index ranges                                | -11 ≤ h ≤ 12, -22 ≤ k ≤ 22, -29 ≤ l ≤ 29                      |
| Reflections collected                       | 70523                                                         |
| Independent reflections                     | 8887 [R <sub>int</sub> = 0.0621, R <sub>sigma</sub> = 0.0363] |
| Data/restraints/parameters                  | 8887/0/550                                                    |
| Goodness-of-fit on F <sup>2</sup>           | 1.045                                                         |
| Final R indexes [ $I \geq 2\sigma(I)$ ]     | R <sub>1</sub> = 0.0411, wR <sub>2</sub> = 0.0897             |
| Final R indexes [all data]                  | R <sub>1</sub> = 0.0572, wR <sub>2</sub> = 0.0952             |
| Largest diff. peak/hole / e Å <sup>-3</sup> | 0.31/-0.36                                                    |

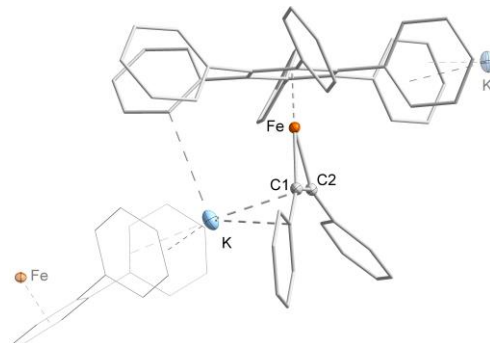

**Figure S 77.** Molecular structure of [KFe( $\eta^6$ -HPB)( $\eta^2$ -PhCCPh)] (**11**). All hydrogen atoms and a disorder in one phenyl ring (part 1: 75%, depicted; part 2: 25%) are omitted for clarity. A free diethyl ether molecule is located on a symmetry element and is heavily disordered over multiple positions. Attempts to model the disorder did not lead to satisfactory results and further gave higher R-values. It was thus squeezed.

**Table S 19.** Crystal data and structure refinement of **12**

|                                             |                                                                                                               |
|---------------------------------------------|---------------------------------------------------------------------------------------------------------------|
| Empirical formula                           | C <sub>74</sub> H <sub>103</sub> K <sub>2</sub> Mn <sub>2</sub> N <sub>2</sub> O <sub>4</sub> Si <sub>2</sub> |
| Formula weight                              | 1328.84                                                                                                       |
| Temperature/K                               | 100.0                                                                                                         |
| Crystal system                              | triclinic                                                                                                     |
| Space group                                 | P-1                                                                                                           |
| a/Å                                         | 12.905(11)                                                                                                    |
| b/Å                                         | 13.215(8)                                                                                                     |
| c/Å                                         | 14.360(9)                                                                                                     |
| α/°                                         | 104.35(5)                                                                                                     |
| β/°                                         | 107.84(6)                                                                                                     |
| γ/°                                         | 105.11(6)                                                                                                     |
| Volume/Å <sup>3</sup>                       | 2103(3)                                                                                                       |
| Z                                           | 1                                                                                                             |
| ρ <sub>calc</sub> /cm <sup>3</sup>          | 1.049                                                                                                         |
| μ/mm <sup>-1</sup>                          | 0.468                                                                                                         |
| F(000)                                      | 709.0                                                                                                         |
| Crystal size/mm <sup>3</sup>                | 0.942 × 0.456 × 0.229                                                                                         |
| Radiation                                   | MoKα (λ = 0.71073)                                                                                            |
| 2θ range for data collection/°              | 3.188 to 49.994                                                                                               |
| Index ranges                                | -15 ≤ h ≤ 15, -15 ≤ k ≤ 15, -17 ≤ l ≤ 17                                                                      |
| Reflections collected                       | 15985                                                                                                         |
| Independent reflections                     | 7390 [R <sub>int</sub> = 0.1069, R <sub>sigma</sub> = 0.0991]                                                 |
| Data/restraints/parameters                  | 7390/3/409                                                                                                    |
| Goodness-of-fit on F <sup>2</sup>           | 0.949                                                                                                         |
| Final R indexes [ I  ≥ 2σ (I)]              | R <sub>1</sub> = 0.0868, wR <sub>2</sub> = 0.2314                                                             |
| Final R indexes [all data]                  | R <sub>1</sub> = 0.1224, wR <sub>2</sub> = 0.2483                                                             |
| Largest diff. peak/hole / e Å <sup>-3</sup> | 0.86/-0.64                                                                                                    |

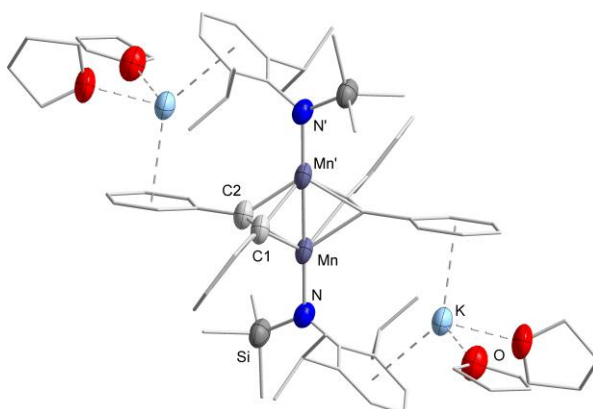

**Figure S 78.** Molecular structure of **12**. All hydrogen atoms and disorders in one *iso*-propyl group and one trimethylsilyl group are omitted for clarity. Two free toluene molecules are heavily disordered over multiple positions. Attempts to model the disorders did not lead to satisfactory results and further gave higher R-values. They were thus squeezed.

**Table S 18.** Crystal data and structure refinement of **13**

|                                             |                                                                               |
|---------------------------------------------|-------------------------------------------------------------------------------|
| Empirical formula                           | C <sub>78</sub> H <sub>70</sub> K <sub>2</sub> Mn <sub>2</sub> O <sub>2</sub> |
| Formula weight                              | 1227.42                                                                       |
| Temperature/K                               | 100.0                                                                         |
| Crystal system                              | monoclinic                                                                    |
| Space group                                 | P2 <sub>1</sub> /c                                                            |
| a/Å                                         | 17.6490(9)                                                                    |
| b/Å                                         | 18.4355(9)                                                                    |
| c/Å                                         | 19.6687(11)                                                                   |
| α/°                                         | 90                                                                            |
| β/°                                         | 93.540(2)                                                                     |
| γ/°                                         | 90                                                                            |
| Volume/Å <sup>3</sup>                       | 6387.4(6)                                                                     |
| Z                                           | 4                                                                             |
| ρ <sub>calc</sub> /cm <sup>3</sup>          | 1.276                                                                         |
| μ/mm <sup>-1</sup>                          | 0.573                                                                         |
| F(000)                                      | 2568.0                                                                        |
| Crystal size/mm <sup>3</sup>                | 0.729 × 0.113 × 0.103                                                         |
| Radiation                                   | MoKα (λ = 0.71073)                                                            |
| 2θ range for data collection/°              | 4.418 to 50.202                                                               |
| Index ranges                                | -18 ≤ h ≤ 21, -21 ≤ k ≤ 21, -23 ≤ l ≤ 23                                      |
| Reflections collected                       | 37162                                                                         |
| Independent reflections                     | 11297 [R <sub>int</sub> = 0.0750, R <sub>sigma</sub> = 0.0891]                |
| Data/restraints/parameters                  | 11297/1548/879                                                                |
| Goodness-of-fit on F <sup>2</sup>           | 1.040                                                                         |
| Final R indexes [I ≥ 2σ (I)]                | R <sub>1</sub> = 0.0829, wR <sub>2</sub> = 0.1868                             |
| Final R indexes [all data]                  | R <sub>1</sub> = 0.1366, wR <sub>2</sub> = 0.2107                             |
| Largest diff. peak/hole / e Å <sup>-3</sup> | 0.70/-0.77                                                                    |

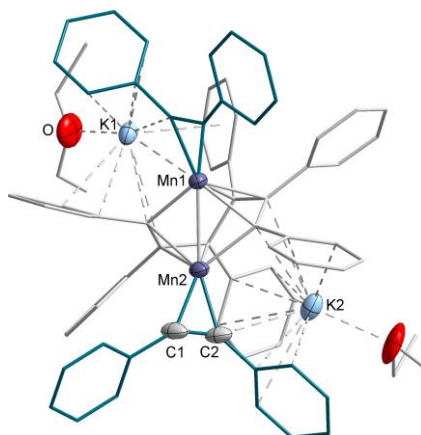**Figure S 79.** Molecular structure of **13**. All hydrogen atoms are omitted for clarity. Disorders in both diethyl ether adducts and two phenyl rings with occupations of 50% for both part 1 (depicted) and part 2 are found.

## [K{18c6}][Fe(L<sup>2</sup>)<sub>2</sub>] x Et<sub>2</sub>O

**Table S 14.** Crystal data and structure refinement of [K{18c6}][Fe(L<sup>2</sup>)<sub>2</sub>] x Et<sub>2</sub>O

|                                             |                                                                                                                 |
|---------------------------------------------|-----------------------------------------------------------------------------------------------------------------|
| Empirical formula                           | C <sub>184</sub> H <sub>344</sub> Fe <sub>4</sub> K <sub>4</sub> N <sub>8</sub> O <sub>28</sub> Si <sub>8</sub> |
| Formula weight                              | 3721.17                                                                                                         |
| Temperature/K                               | 100                                                                                                             |
| Crystal system                              | monoclinic                                                                                                      |
| Space group                                 | P2 <sub>1</sub> /n                                                                                              |
| a/Å                                         | 10.3333(7)                                                                                                      |
| b/Å                                         | 34.0397(14)                                                                                                     |
| c/Å                                         | 15.5254(9)                                                                                                      |
| α/°                                         | 90                                                                                                              |
| β/°                                         | 95.062(5)                                                                                                       |
| γ/°                                         | 90                                                                                                              |
| Volume/Å <sup>3</sup>                       | 5439.6(5)                                                                                                       |
| Z                                           | 1                                                                                                               |
| ρ <sub>calc</sub> /cm <sup>3</sup>          | 1.136                                                                                                           |
| μ/mm <sup>-1</sup>                          | 0.442                                                                                                           |
| F(000)                                      | 2020.0                                                                                                          |
| Crystal size/mm <sup>3</sup>                | 0.888 × 0.304 × 0.225                                                                                           |
| Radiation                                   | MoKα (λ = 0.71073)                                                                                              |
| 2θ range for data collection/°              | 4.944 to 53.622                                                                                                 |
| Index ranges                                | -13 ≤ h ≤ 13, -43 ≤ k ≤ 43, -19 ≤ l ≤ 18                                                                        |
| Reflections collected                       | 42532                                                                                                           |
| Independent reflections                     | 11480 [R <sub>int</sub> = 0.0441, R <sub>sigma</sub> = 0.0347]                                                  |
| Data/restraints/parameters                  | 11480/0/548                                                                                                     |
| Goodness-of-fit on F <sup>2</sup>           | 1.046                                                                                                           |
| Final R indexes [I ≥ 2σ (I)]                | R <sub>1</sub> = 0.0422, wR <sub>2</sub> = 0.1070                                                               |
| Final R indexes [all data]                  | R <sub>1</sub> = 0.0648, wR <sub>2</sub> = 0.1172                                                               |
| Largest diff. peak/hole / e Å <sup>-3</sup> | 0.59/-0.69                                                                                                      |

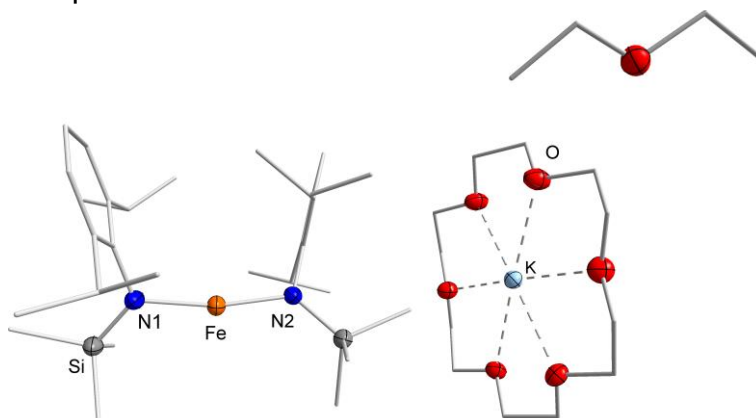

**Figure S 80.** Molecular structure of [K{18c6}][Fe(L<sup>2</sup>)<sub>2</sub>] x Et<sub>2</sub>O. All hydrogen atoms are omitted for clarity.

## References

(1) Lin, C.-Y.; Fettingner, J. C.; Grandjean, F.; Long, G. J.; Power, P. P. Synthesis, Structure, and Magnetic and Electrochemical Properties of Quasi-Linear and Linear Iron(I), Cobalt(I), and Nickel(I) Amido Complexes // Synthesis, structure, and magnetic and electrochemical properties of quasi-linear and linear iron(I), cobalt(I), and nickel(I) amido complexes. *Inorg. Chem.* **2014**, *53*, 9400–9406.
